# Supplementary material for: KIFC1 promotes proliferation and pseudo-bipolar division of ESCC through the transportation of Aurora B kinase
Source: Aging (Albany NY). 2023 Nov 8;15(21):12633–50. doi: 10.18632/aging.205203 (PMC10683620; doi:10.18632/aging.205203)
Supplement: Supplementary Table 1 [file aging-15-205203-s002.xlsx]

## Sheet: IgG-KIFC1
Supplementary Table 1. Proteins pulldown by anti-KIFC1 antibody.
Protein IDs	Majority protein IDs	Protein names	Gene names	Fasta headers	Number of proteins	Peptides	Razor + unique peptides	Unique peptides	Sequence coverage [%]	Mol. weight [kDa]	Sequence length	Score	Peptides IgG	Peptides KIFC1	Razor + unique peptides IgG	Razor + unique peptides KIFC1	Unique peptides IgG	Unique peptides KIFC1	Sequence coverage IgG [%]	Sequence coverage KIFC1 [%]	Intensity	Intensity IgG	Intensity KIFC1	iBAQ	iBAQ IgG	iBAQ KIFC1
Q53G76;P60709;Q53GK6;Q1KLZ0;Q53G99;B4E335;Q8WVW5;E7EVS6;B4DW52;A0A6Q8PFE4;A0A2R8Y793;Q6PJ43;B7ZAP6;B3KWQ3;A0A2R8YGF8;Q96DE1;A0A6Q8PH58;Q96FU6;G5E9R0;V9HVZ7;C9JZR7;C9JUM1;A5GZ75;F1BXA6;A4UCT3;A5A3E0;Q6S8J3;C9JTX5;P0CG38;Q9UE89;L0R5C4;Q562Y6;A0A2R8YFE2;Q562Z7;P0CG39;Q9BYX7;Q562N8;Q562S0;Q562X9;Q562N0;Q562L9;Q562R8;Q562L6;Q562Y8;Q562L5;Q562M5;A0A2R8YEA7;Q562M3;Q562P9;Q562U1;Q562P0;Q562Z4;Q562N6;Q562…	Q53G76;P60709;Q53GK6;Q1KLZ0;Q53G99;B4E335;Q8WVW5;E7EVS6;B4DW52;A0A6Q8PFE4;A0A2R8Y793;Q6PJ43;B7ZAP6;B3KWQ3	Beta actin variant (Fragment);Actin, cytoplasmic 1	;ACTB	tr|Q53G76|Q53G76_HUMAN Beta actin variant (Fragment) OS=Homo sapiens OX=9606 PE=2 SV=1;sp|P60709|ACTB_HUMAN Actin, cytoplasmic 1 OS=Homo sapiens OX=9606 GN=ACTB PE=1 SV=1;tr|Q53GK6|Q53GK6_HUMAN Beta actin variant (Fragment) OS=Homo sapiens OX=9606 PE=2 SV=	60	19	19	1	68	41.72	375	323.31	9	18	9	18	0	1	31.5	60.3	8314300000	648190000	7666100000	262980000	23911000	239060000	9.99791
Q5TEC6;A0A590UJL8	Q5TEC6;A0A590UJL8	Histone H3-7;Histone H3-7 (Fragment)	H3-7	sp|Q5TEC6|H37_HUMAN Histone H3-7 OS=Homo sapiens OX=9606 GN=H3-7 PE=1 SV=1;tr|A0A590UJL8|A0A590UJL8_HUMAN Histone H3-7 (Fragment) OS=Homo sapiens OX=9606 GN=H3-7 PE=1 SV=1	2	5	5	1	29.4	15.43	136	34.906	4	5	4	5	1	1	22.8	29.4	1746700000	133860000	1612800000	218330000	16733000	201600000	12.048
P62807;O60814;B4DR52;I6L9F7;U3KQK0;A8K9J7;A0A024RCL8;A0A024RCJ9;B2R4S9;A0A024QZZ7;P57053;P58876;Q5QNW6;Q93079;Q99877;Q99879;Q99880;Q0D2M2;Q96A08;A0A2R8Y619;L0R4T3	P62807;O60814;B4DR52;I6L9F7;U3KQK0;A8K9J7;A0A024RCL8;A0A024RCJ9;B2R4S9;A0A024QZZ7;P57053;P58876;Q5QNW6;Q93079;Q99877;Q99879;Q99880;Q0D2M2;Q96A08	Histone H2B type 1-C/E/F/G/I;Histone H2B type 1-K;Histone H2B;	H2BC10;H2BC12;	sp|P62807|H2B1C_HUMAN Histone H2B type 1-C/E/F/G/I OS=Homo sapiens OX=9606 GN=H2BC10 PE=1 SV=4;sp|O60814|H2B1K_HUMAN Histone H2B type 1-K OS=Homo sapiens OX=9606 GN=H2BC12 PE=1 SV=3;tr|B4DR52|B4DR52_HUMAN Histone H2B OS=Homo sapiens OX=9606 PE=1 SV=1;tr|I6	21	6	6	2	46	13.906	126	72.848	2	6	2	6	1	2	19.8	46	2137400000	14172000	2123200000	186340000	1288400	185050000	143.628
A0A2R8Y851;P62273;A0A2R8Y6P7;A0A087WTT6	A0A2R8Y851;P62273;A0A2R8Y6P7;A0A087WTT6	40S ribosomal protein S29;	RPS29;	tr|A0A2R8Y851|A0A2R8Y851_HUMAN 40S ribosomal protein S29 OS=Homo sapiens OX=9606 GN=RPS29 PE=1 SV=1;sp|P62273|RS29_HUMAN 40S ribosomal protein S29 OS=Homo sapiens OX=9606 GN=RPS29 PE=1 SV=2;tr|A0A2R8Y6P7|A0A2R8Y6P7_HUMAN 40S ribosomal protein S29 (Fragment	4	4	4	4	29.9	10.256	87	33.786	3	4	3	4	3	4	21.8	29.9	1506700000	163760000	1342900000	165600000	19739000	145860000	7.38943
F8W1R7;G3V1V0;P60660;J3KND3;G8JLA2;B7Z6Z4;F8VPF3;G3V1Y7;Q6IBG5;F8VZU9;F8W180;F8VXL3;H0YI43	F8W1R7;G3V1V0;P60660;J3KND3;G8JLA2;B7Z6Z4;F8VPF3;G3V1Y7;Q6IBG5	Myosin light polypeptide 6	MYL6;	tr|F8W1R7|F8W1R7_HUMAN Myosin light polypeptide 6 OS=Homo sapiens OX=9606 GN=MYL6 PE=1 SV=1;tr|G3V1V0|G3V1V0_HUMAN Myosin light polypeptide 6 OS=Homo sapiens OX=9606 GN=MYL6 PE=1 SV=1;sp|P60660|MYL6_HUMAN Myosin light polypeptide 6 OS=Homo sapiens OX=9606	13	7	7	4	51	16.29	145	62.23	3	7	3	7	1	4	22.8	51	1654700000	30365000	1624300000	139420000	2760500	136660000	49.5055
P50238;K4DIB9;H3BRQ4	P50238	Cysteine-rich protein 1	CRIP1	sp|P50238|CRIP1_HUMAN Cysteine-rich protein 1 OS=Homo sapiens OX=9606 GN=CRIP1 PE=1 SV=3	3	5	5	5	67.5	8.5328	77	72.83	3	5	3	5	3	5	54.5	67.5	1237100000	475840000	761230000	91859000	7564000	84295000	11.1442
Q59GN2;P62891;D6W5G5;Q96EH5	Q59GN2;P62891;D6W5G5;Q96EH5	Putative 60S ribosomal protein L39-like 5;60S ribosomal protein L39;HCG1991833, isoform CRA_a	RPL39P5;RPL39;	sp|Q59GN2|R39L5_HUMAN Putative 60S ribosomal protein L39-like 5 OS=Homo sapiens OX=9606 GN=RPL39P5 PE=5 SV=2;sp|P62891|RL39_HUMAN 60S ribosomal protein L39 OS=Homo sapiens OX=9606 GN=RPL39 PE=1 SV=2;tr|D6W5G5|D6W5G5_HUMAN HCG1991833, isoform CRA_a OS=Homo	4	2	2	2	31.4	6.3225	51	17.119	1	2	1	2	1	2	19.6	31.4	91469000	5494300	85975000	61093000	5494300	61093000	11.1193
A0A024R1N1;P35579;A0A8I5KWT8;A0A0U4BW16;Q86XU5;Q6ZNL4;B4E3S1;Q5BKV1;A0A8I5KU92;A0A8I5KYI1;A0A8I5KZ38;P35580;Q99529;B1AH99;B1PS43;A0A024QZJ4;A0A024QZJ6;P35749;A0A7R6KYT5;Q7Z7R0;Q9UMJ0;O14729;O14794;Q2PS10;Q68D89;A1L2Z2;B4E177;Q59EV3;REV__Q9UKV3;B4DRV3;B4E0I9;A0A6E1W127;B4DFX9;REV__E7EQT4;V9HWC1;G1UI33;A8CLL2;REV__S4R3H4;A0A8I5KTT7;Q16086;Q66K75;A5YM51;A7E2Y1;P13535;Q9UKX3;Q9UKX2;P11055;P12883;P128…	A0A024R1N1;P35579;A0A8I5KWT8;A0A0U4BW16;Q86XU5	Myosin, heavy polypeptide 9, non-muscle, isoform CRA_a;Myosin-9	MYH9;	tr|A0A024R1N1|A0A024R1N1_HUMAN Myosin, heavy polypeptide 9, non-muscle, isoform CRA_a OS=Homo sapiens OX=9606 GN=MYH9 PE=3 SV=1;sp|P35579|MYH9_HUMAN Myosin-9 OS=Homo sapiens OX=9606 GN=MYH9 PE=1 SV=4;tr|A0A8I5KWT8|A0A8I5KWT8_HUMAN Myosin-9 OS=Homo sapiens	54	125	125	121	50.7	226.53	1960	323.31	8	125	8	125	7	121	5.5	50.7	12074000000	108710000	11965000000	60768000	295080	60472000	204.934
P16403	P16403	Histone H1.2	H1-2	sp|P16403|H12_HUMAN Histone H1.2 OS=Homo sapiens OX=9606 GN=H1-2 PE=1 SV=2	1	12	12	4	37.6	21.364	213	96.775	6	12	6	12	0	4	17.8	37.6	909090000	157860000	751240000	70896000	12134000	58762000	4.84276
F8WB16;Q20BG7;Q2I0A6;Q2I096;Q20BI7;Q20BG9;Q8WZ74	F8WB16;Q20BG7;Q2I0A6;Q2I096;Q20BI7;Q20BG9;Q8WZ74	Cortactin-binding protein 2;Cortactin-binding protein 2 (Fragment);	CTTNBP2;	tr|F8WB16|F8WB16_HUMAN Cortactin-binding protein 2 OS=Homo sapiens OX=9606 GN=CTTNBP2 PE=1 SV=1;tr|Q20BG7|Q20BG7_HUMAN Cortactin-binding protein 2 (Fragment) OS=Homo sapiens OX=9606 GN=CTTNBP2 PE=4 SV=1;tr|Q2I0A6|Q2I0A6_HUMAN Cortactin-binding protein 2 OS	7	1	1	1	2	69.052	640	6.1454	0	1	0	1	0	1	0	2	2102800000	0	2102800000	51289000	0	51289000
Q53HL1;J3QRS3;P19105;O14950;Q2F834;Q71U02;Q6IBG1;A0A384NY64;P24844	Q53HL1;J3QRS3;P19105;O14950	Myosin regulatory light chain MRCL3 variant (Fragment);Myosin regulatory light chain 12A;	;MYL12A	tr|Q53HL1|Q53HL1_HUMAN Myosin regulatory light chain MRCL3 variant (Fragment) OS=Homo sapiens OX=9606 PE=2 SV=1;tr|J3QRS3|J3QRS3_HUMAN Myosin regulatory light chain 12A OS=Homo sapiens OX=9606 GN=MYL12A PE=1 SV=1;sp|P19105|ML12A_HUMAN Myosin regulatory lig	9	3	3	3	17.5	19.793	171	53.898	0	3	0	3	0	3	0	17.5	397890000	0	397890000	36172000	0	36172000
K7EMH1;K7ERI7;Q7Z4W8;P35268;K7EP65;K7EKS7;K7ELC4;K7EJT5	K7EMH1;K7ERI7;Q7Z4W8;P35268;K7EP65;K7EKS7;K7ELC4	60S ribosomal protein L22 (Fragment);60S ribosomal protein L22;Heparin-binding protein HBp15	RPL22;	tr|K7EMH1|K7EMH1_HUMAN 60S ribosomal protein L22 (Fragment) OS=Homo sapiens OX=9606 GN=RPL22 PE=1 SV=1;tr|K7ERI7|K7ERI7_HUMAN 60S ribosomal protein L22 OS=Homo sapiens OX=9606 GN=RPL22 PE=1 SV=1;tr|Q7Z4W8|Q7Z4W8_HUMAN Heparin-binding protein HBp15 OS=Homo	8	5	5	5	43.8	10.422	89	32.22	1	5	1	5	1	5	13.5	43.8	147920000	0	147920000	19281000	0	19281000
P16401	P16401	Histone H1.5	H1-5	sp|P16401|H15_HUMAN Histone H1.5 OS=Homo sapiens OX=9606 GN=H1-5 PE=1 SV=3	1	7	6	6	22.1	22.58	226	38.546	0	7	0	6	0	6	0	22.1	231320000	0	231320000	18868000	0	18868000
B0YIW2;A3KPE2;P02656	B0YIW2;A3KPE2;P02656	Apolipoprotein C-III	APOC3	tr|B0YIW2|B0YIW2_HUMAN Apolipoprotein C-III OS=Homo sapiens OX=9606 GN=APOC3 PE=1 SV=1;tr|A3KPE2|A3KPE2_HUMAN Apolipoprotein C-III OS=Homo sapiens OX=9606 GN=APOC3 PE=2 SV=1;sp|P02656|APOC3_HUMAN Apolipoprotein C-III OS=Homo sapiens OX=9606 GN=APOC3 PE=1 S	3	1	1	1	13.7	12.815	117	15.482	1	1	1	1	1	1	13.7	13.7	171120000	5478100	165640000	18404000	608680	18404000	30.2359
Q5JR95;Q5JR94;P62241;Q9BS10	Q5JR95;Q5JR94;P62241;Q9BS10	40S ribosomal protein S8	RPS8;	tr|Q5JR95|Q5JR95_HUMAN 40S ribosomal protein S8 OS=Homo sapiens OX=9606 GN=RPS8 PE=1 SV=1;tr|Q5JR94|Q5JR94_HUMAN 40S ribosomal protein S8 OS=Homo sapiens OX=9606 GN=RPS8 PE=2 SV=1;sp|P62241|RS8_HUMAN 40S ribosomal protein S8 OS=Homo sapiens OX=9606 GN=RPS8	4	9	9	9	47.9	21.879	188	80.309	2	9	2	9	2	9	14.9	47.9	203050000	16152000	186900000	18139000	1615200	16524000	10.2303
E9PP36;E9PKU4;P62917;B4DVG7;E9PKZ0	E9PP36;E9PKU4;P62917;B4DVG7;E9PKZ0	60S ribosomal protein L8;60S ribosomal protein L8 (Fragment)	RPL8;	tr|E9PP36|E9PP36_HUMAN 60S ribosomal protein L8 OS=Homo sapiens OX=9606 GN=RPL8 PE=1 SV=1;tr|E9PKU4|E9PKU4_HUMAN 60S ribosomal protein L8 (Fragment) OS=Homo sapiens OX=9606 GN=RPL8 PE=1 SV=1;sp|P62917|RL8_HUMAN 60S ribosomal protein L8 OS=Homo sapiens OX=9	5	2	2	2	12.8	16.18	148	14.338	0	2	0	2	0	2	0	12.8	110540000	0	110540000	15792000	0	15792000
A0A087X2D0;B2R6F3;P84103	A0A087X2D0;B2R6F3;P84103	Serine/arginine-rich-splicing factor 3;Epididymis secretory sperm binding protein;	SRSF3;SFRS3;	tr|A0A087X2D0|A0A087X2D0_HUMAN Serine/arginine-rich-splicing factor 3 OS=Homo sapiens OX=9606 GN=SRSF3 PE=1 SV=1;tr|B2R6F3|B2R6F3_HUMAN Epididymis secretory sperm binding protein OS=Homo sapiens OX=9606 GN=SFRS3 PE=2 SV=1;sp|P84103|SRSF3_HUMAN Serine/argin	3	3	3	3	44.2	10.32	95	45.642	0	3	0	3	0	3	0	44.2	122720000	0	122720000	15118000	0	15118000
Q562R1	Q562R1	Beta-actin-like protein 2	ACTBL2	sp|Q562R1|ACTBL_HUMAN Beta-actin-like protein 2 OS=Homo sapiens OX=9606 GN=ACTBL2 PE=1 SV=2	1	3	1	1	12	42.003	376	-2	2	3	0	1	0	1	7.2	12	258040000	0	258040000	10752000	0	10752000
P67936;V9HW56;A0A2R8Y5V9;A0A2R8YGX3;B4DVY2;A0A2R8YH90;A0A2R8YE05;B4DTB1;K7ENT6;A0A2R8YHD2;A0A2R8YEU4;P07951;V9HW25;Q5TCU3;A7XZE4;B4DGC2;A0A5F9UN72;B4DTK3;A0A494C0G0;H0YL80;A0A590UK79;B4E3P1;A0A590UJB9;U3KQK2;K7EPB9	P67936;V9HW56;A0A2R8Y5V9;A0A2R8YGX3;B4DVY2;A0A2R8YH90;A0A2R8YE05;B4DTB1;K7ENT6;A0A2R8YHD2;A0A2R8YEU4	Tropomyosin alpha-4 chain;Epididymis secretory protein Li 108	TPM4;HEL-S-108;	sp|P67936|TPM4_HUMAN Tropomyosin alpha-4 chain OS=Homo sapiens OX=9606 GN=TPM4 PE=1 SV=3;tr|V9HW56|V9HW56_HUMAN Epididymis secretory protein Li 108 OS=Homo sapiens OX=9606 GN=HEL-S-108 PE=1 SV=1;tr|A0A2R8Y5V9|A0A2R8Y5V9_HUMAN Tropomyosin alpha-4 chain OS=H	25	15	15	9	41.9	28.521	248	117.65	1	15	1	15	1	9	4.4	41.9	306110000	0	306110000	9904300	0	9904300
Q9Y3U8;J3QSB5	Q9Y3U8	60S ribosomal protein L36	RPL36	sp|Q9Y3U8|RL36_HUMAN 60S ribosomal protein L36 OS=Homo sapiens OX=9606 GN=RPL36 PE=1 SV=3	2	3	3	3	21.9	12.254	105	20.103	0	3	0	3	0	3	0	21.9	63326000	0	63326000	9852800	0	9852800
J3KRB3;A0A087WWH0;J3QS96;A0A087WXM6;J3QQT2;J3KRX5;A0A024R261;A0A0A6YYL6;P18621;J3QLC8;A0A0A0MRF8;A0A087WY81;J3KSJ0;A4D1R6;A4D1R5	J3KRB3;A0A087WWH0;J3QS96;A0A087WXM6;J3QQT2;J3KRX5;A0A024R261;A0A0A6YYL6;P18621;J3QLC8;A0A0A0MRF8;A0A087WY81	60S ribosomal protein L17 (Fragment);	RPL17;	tr|J3KRB3|J3KRB3_HUMAN 60S ribosomal protein L17 (Fragment) OS=Homo sapiens OX=9606 GN=RPL17 PE=1 SV=3;tr|A0A087WWH0|A0A087WWH0_HUMAN 60S ribosomal protein L17 (Fragment) OS=Homo sapiens OX=9606 GN=RPL17 PE=1 SV=6;tr|J3QS96|J3QS96_HUMAN 60S ribosomal prote	15	6	6	6	45	14.894	129	51.501	2	6	2	6	2	6	14.7	45	182480000	22234000	160250000	10051000	1621500	8430000	5.19889
F8WCJ6	F8WCJ6	NADH dehydrogenase [ubiquinone] 1 beta subcomplex subunit 2, mitochondrial	NDUFB2	tr|F8WCJ6|F8WCJ6_HUMAN NADH dehydrogenase [ubiquinone] 1 beta subcomplex subunit 2, mitochondrial OS=Homo sapiens OX=9606 GN=NDUFB2 PE=4 SV=1	1	1	1	1	52.9	3.54	34	11.382	0	1	0	1	0	1	0	52.9	24898000	0	24898000	8299200	0	8299200
L0R512	L0R512	Alternative protein NCAM2	NCAM2	tr|L0R512|L0R512_HUMAN Alternative protein NCAM2 OS=Homo sapiens OX=9606 GN=NCAM2 PE=4 SV=1	1	1	1	1	21.4	4.7347	42	6.2331	0	1	0	1	0	1	0	21.4	24286000	0	24286000	8095200	0	8095200
J3QR09;J3KTE4;A0A7I2YQG2;P84098;Q8IWR8;Q53G49;A0A7I2V638;A0A7I2V4U6;A0A7I2V2L0;A0A7I2V512	J3QR09;J3KTE4;A0A7I2YQG2;P84098;Q8IWR8;Q53G49	Ribosomal protein L19	RPL19;	tr|J3QR09|J3QR09_HUMAN Ribosomal protein L19 OS=Homo sapiens OX=9606 GN=RPL19 PE=1 SV=1;tr|J3KTE4|J3KTE4_HUMAN Ribosomal protein L19 OS=Homo sapiens OX=9606 GN=RPL19 PE=1 SV=1;tr|A0A7I2YQG2|A0A7I2YQG2_HUMAN Ribosomal protein L19 OS=Homo sapiens OX=9606 GN=	10	5	5	5	27.5	23.134	193	31.895	1	5	1	5	1	5	4.7	27.5	102030000	2834200	99193000	7928600	314910	7928600	25.1774
Q9NZT1;Q53H37	Q9NZT1;Q53H37	Calmodulin-like protein 5;Calmodulin-like skin protein variant (Fragment)	CALML5;	sp|Q9NZT1|CALL5_HUMAN Calmodulin-like protein 5 OS=Homo sapiens OX=9606 GN=CALML5 PE=1 SV=2;tr|Q53H37|Q53H37_HUMAN Calmodulin-like skin protein variant (Fragment) OS=Homo sapiens OX=9606 PE=2 SV=1	2	6	6	6	61	15.892	146	55.909	0	6	0	6	0	6	0	61	75048000	0	75048000	7461500	0	7461500
A0A024RCJ2;Q8N257;Q16778;P33778;P23527;P06899;Q6DRA6;Q6DN03	A0A024RCJ2;Q8N257;Q16778;P33778;P23527;P06899	Histone H2B;Histone H2B type 3-B;Histone H2B type 2-E	HIST1H2BJ;H2BC26;H2BC21	tr|A0A024RCJ2|A0A024RCJ2_HUMAN Histone H2B OS=Homo sapiens OX=9606 GN=HIST1H2BJ PE=3 SV=1;sp|Q8N257|H2B3B_HUMAN Histone H2B type 3-B OS=Homo sapiens OX=9606 GN=H2BC26 PE=1 SV=3;sp|Q16778|H2B2E_HUMAN Histone H2B type 2-E OS=Homo sapiens OX=9606 GN=H2BC21 PE	8	5	1	1	44.4	13.904	126	12.306	1	5	0	1	0	1	11.9	44.4	91633000	0	91633000	7074600	0	7074600
P47929	P47929	Galectin-7	LGALS7B	sp|P47929|LEG7_HUMAN Galectin-7 OS=Homo sapiens OX=9606 GN=LGALS7B PE=1 SV=2	1	5	5	5	43.4	15.075	136	39.967	0	5	0	5	0	5	0	43.4	120250000	0	120250000	6935100	0	6935100
P49207;A1LUY1;Q5MK14	P49207;A1LUY1	60S ribosomal protein L34	RPL34	sp|P49207|RL34_HUMAN 60S ribosomal protein L34 OS=Homo sapiens OX=9606 GN=RPL34 PE=1 SV=3;tr|A1LUY1|A1LUY1_HUMAN 60S ribosomal protein L34 OS=Homo sapiens OX=9606 GN=RPL34 PE=3 SV=1	3	3	3	3	21.4	13.293	117	18.044	0	3	0	3	0	3	0	21.4	37359000	0	37359000	6226600	0	6226600
A8K3K1;P68133;P68032;A6NL76;B7Z6P1;P62736;Q7Z7J6;D2JYH4;P63267;B3KUD3;A0A804HKV3;Q13707;B3KW67;B4DUI8;B7Z6I1;F6UVQ4;F6QUT6;C9JFL5;B8ZZJ2;F8WB63;B3KPP5;F8WCH0;Q562X2;Q562Q9;Q562T8;A0A173GMX0;K4EP00;Q562R5;Q562X7;Q562L3;Q562P8;Q562Q0;Q562X0;Q562Q4;Q562Q2;G8FSY7;Q562Q8;Q562R0;Q562X4;Q562Y4;Q562R6;Q562W2;Q562T0;Q562T3;Q562T4;Q562T5;Q562T6;Q562X1;Q562U0;K4EQ44;K4ENJ5;Q562X6;Q562Q6	A8K3K1;P68133;P68032;A6NL76;B7Z6P1;P62736;Q7Z7J6;D2JYH4;P63267;B3KUD3;A0A804HKV3;Q13707;B3KW67;B4DUI8;B7Z6I1;F6UVQ4;F6QUT6;C9JFL5;B8ZZJ2;F8WB63	cDNA FLJ78096, highly similar to Homo sapiens actin, alpha, cardiac muscle (ACTC), mRNA;Actin, alpha skeletal muscle;	;ACTA1	tr|A8K3K1|A8K3K1_HUMAN cDNA FLJ78096, highly similar to Homo sapiens actin, alpha, cardiac muscle (ACTC), mRNA OS=Homo sapiens OX=9606 PE=2 SV=1;sp|P68133|ACTS_HUMAN Actin, alpha skeletal muscle OS=Homo sapiens OX=9606 GN=ACTA1 PE=1 SV=1;sp|P68032|ACTC_HUM	53	10	1	1	26.8	42.047	377	7.054	7	10	0	1	0	1	18.8	26.8	140210000	0	140210000	6095900	0	6095900
A0A0S2Z4G4;A0A0S2Z4I4;B2RDE1;A0A087WWU8;A0A0S2Z4G8;Q5HYB6;J3KN67;P06753;M1VPF4;A0A2R2Y2Q3;A0A494C0P6;B4DWT5;Q8NAG3;Q8NAH0;B4DQ80;Q5VU62;D6R904;Q6LDX7;Q8NI98;Q5VU61;A0A494C034;A0A024R4K5	A0A0S2Z4G4;A0A0S2Z4I4;B2RDE1;A0A087WWU8;A0A0S2Z4G8;Q5HYB6;J3KN67;P06753;M1VPF4;A0A2R2Y2Q3;A0A494C0P6;B4DWT5;Q8NAG3;Q8NAH0;B4DQ80	Tropomyosin 3 isoform 1 (Fragment);Tropomyosin 3 isoform 3 (Fragment);	TPM3;	tr|A0A0S2Z4G4|A0A0S2Z4G4_HUMAN Tropomyosin 3 isoform 1 (Fragment) OS=Homo sapiens OX=9606 GN=TPM3 PE=2 SV=1;tr|A0A0S2Z4I4|A0A0S2Z4I4_HUMAN Tropomyosin 3 isoform 3 (Fragment) OS=Homo sapiens OX=9606 GN=TPM3 PE=2 SV=1;tr|B2RDE1|B2RDE1_HUMAN cDNA, FLJ96568, h	22	13	7	7	36.7	29.032	248	43.029	0	13	0	7	0	7	0	36.7	206280000	0	206280000	5955800	0	5955800
B5MDF5;J3KQE5;P62826;H0YFC6;Q96QB7;Q0EFC9;B4DV51;F5H018	B5MDF5;J3KQE5;P62826;H0YFC6;Q96QB7;Q0EFC9;B4DV51;F5H018	GTP-binding nuclear protein Ran;GTP-binding nuclear protein Ran (Fragment);	RAN;	tr|B5MDF5|B5MDF5_HUMAN GTP-binding nuclear protein Ran OS=Homo sapiens OX=9606 GN=RAN PE=1 SV=1;tr|J3KQE5|J3KQE5_HUMAN GTP-binding nuclear protein Ran (Fragment) OS=Homo sapiens OX=9606 GN=RAN PE=1 SV=1;sp|P62826|RAN_HUMAN GTP-binding nuclear protein Ran O	8	2	2	2	9	26.224	233	12.66	1	2	1	2	1	2	4.7	9	73081000	7572100	65509000	6643700	688370	5955300	8.65131
P07910;G3V2Q1;B2R603;B3KX96;G3V4C1;A8K9A4;B2R5W2;B4DY08;G3V576;G3V4W0;G3V3K6;G3V5X6;B4DMJ1;G3V575;B4DSU6;G3V555;G3V251;D3DPI2;G3V4M8;B7ZW38;P0DMR1;O60812;A0A0G2JPF8;A0A0G2JNQ3;G3V2H6;B2RXH8;Q6PKD2;Q569J8;G3V5V7;G3V2D6;B4DQQ2	P07910;G3V2Q1;B2R603;B3KX96;G3V4C1;A8K9A4;B2R5W2;B4DY08;G3V576;G3V4W0;G3V3K6;G3V5X6;B4DMJ1;G3V575;B4DSU6;G3V555;G3V251;D3DPI2;G3V4M8;B7ZW38;P0DMR1;O60812;A0A0G2JPF8;A0A0G2JNQ3;G3V2H6;B2RXH8;Q6PKD2;Q569J8	Heterogeneous nuclear ribonucleoproteins C1/C2;	HNRNPC;	sp|P07910|HNRPC_HUMAN Heterogeneous nuclear ribonucleoproteins C1/C2 OS=Homo sapiens OX=9606 GN=HNRNPC PE=1 SV=4;tr|G3V2Q1|G3V2Q1_HUMAN Heterogeneous nuclear ribonucleoproteins C1/C2 OS=Homo sapiens OX=9606 GN=HNRNPC PE=1 SV=1;tr|B2R603|B2R603_HUMAN cDNA,	31	6	6	6	19.6	33.67	306	56.816	0	6	0	6	0	6	0	19.6	192820000	0	192820000	5816600	0	5816600
F8W1I5;A0A024RB31;A0A8Q3SIC5;B4E368;P14649;A0A8Q3SI90	F8W1I5;A0A024RB31;A0A8Q3SIC5;B4E368;P14649;A0A8Q3SI90	Myosin light chain 6B;Myosin, light polypeptide 6B, alkali, smooth muscle and non-muscle, isoform CRA_a;	MYL6B;	tr|F8W1I5|F8W1I5_HUMAN Myosin light chain 6B OS=Homo sapiens OX=9606 GN=MYL6B PE=1 SV=1;tr|A0A024RB31|A0A024RB31_HUMAN Myosin, light polypeptide 6B, alkali, smooth muscle and non-muscle, isoform CRA_a OS=Homo sapiens OX=9606 GN=MYL6B PE=4 SV=1;tr|A0A8Q3SIC	6	4	1	1	21.7	19.036	175	7.9395	3	4	1	1	1	1	18.3	21.7	70500000	3091400	67408000	5875000	257620	5617300	21.8046
A0A024RCS7;Q9BW19;B4E063;A0A1U9X7Y0;A0A1U9X7X5;B4DMA8;A2AB20;A0A140T9E6;A0A087X1W5	A0A024RCS7;Q9BW19;B4E063;A0A1U9X7Y0;A0A1U9X7X5;B4DMA8	Kinesin-like protein;Kinesin-like protein KIFC1	KIFC1;	tr|A0A024RCS7|A0A024RCS7_HUMAN Kinesin-like protein OS=Homo sapiens OX=9606 GN=KIFC1 PE=3 SV=1;sp|Q9BW19|KIFC1_HUMAN Kinesin-like protein KIFC1 OS=Homo sapiens OX=9606 GN=KIFC1 PE=1 SV=2;tr|B4E063|B4E063_HUMAN Kinesin-like protein OS=Homo sapiens OX=9606 P	9	21	21	21	29.9	73.747	673	150.97	0	21	0	21	0	21	0	29.9	295210000	0	295210000	5458400	0	5458400
B4DSW4;REV__H7BZ66;REV__Q03721	B4DSW4;REV__H7BZ66;REV__Q03721	cDNA FLJ51541, moderately similar to Transcription factor Sp8;Potassium voltage-gated channel subfamily C member 4;	;KCNC4	tr|B4DSW4|B4DSW4_HUMAN cDNA FLJ51541, moderately similar to Transcription factor Sp8 OS=Homo sapiens OX=9606 PE=2 SV=1;tr|H7BZ66|H7BZ66_HUMAN Potassium voltage-gated channel subfamily C member 4 OS=Homo sapiens OX=9606 GN=KCNC4 PE=1 SV=1;sp|Q03721|KCNC4_HU	3	1	1	1	3.8	16.433	157	25.551	0	1	0	1	0	1	0	3.8	44124000	0	44124000	4902700	0	4902700
F5H6E2;B7Z3E5;O00159;D3DTH7;I3L501;A1L180	F5H6E2;B7Z3E5;O00159;D3DTH7	Unconventional myosin-Ic;cDNA FLJ53573, highly similar to Myosin Ic	MYO1C;	tr|F5H6E2|F5H6E2_HUMAN Unconventional myosin-Ic OS=Homo sapiens OX=9606 GN=MYO1C PE=1 SV=1;tr|B7Z3E5|B7Z3E5_HUMAN cDNA FLJ53573, highly similar to Myosin Ic OS=Homo sapiens OX=9606 PE=2 SV=1;sp|O00159|MYO1C_HUMAN Unconventional myosin-Ic OS=Homo sapiens OX	6	15	15	6	17	118.99	1039	120.52	0	15	0	15	0	6	0	17	345740000	0	345740000	4782900	0	4782900
Q9BRL5;P0DP25;P0DP24;P0DP23;B4DJ51;B2RDW0;E7EMB3;G3V361;A0A590UJI2;Q96HY3;A8K1M2;A0A590UJC0;G3V226;F8WBR5;M0QZ52;G3V479	Q9BRL5;P0DP25;P0DP24;P0DP23;B4DJ51;B2RDW0;E7EMB3;G3V361;A0A590UJI2;Q96HY3;A8K1M2;A0A590UJC0;G3V226	CALM3 protein;Calmodulin-3;Calmodulin-2;	;CALM3;CALM2	tr|Q9BRL5|Q9BRL5_HUMAN CALM3 protein OS=Homo sapiens OX=9606 PE=1 SV=1;sp|P0DP25|CALM3_HUMAN Calmodulin-3 OS=Homo sapiens OX=9606 GN=CALM3 PE=1 SV=1;sp|P0DP24|CALM2_HUMAN Calmodulin-2 OS=Homo sapiens OX=9606 GN=CALM2 PE=1 SV=1;sp|P0DP23|CALM1_HUMAN Calmodu	16	6	6	6	42.2	16.506	147	40.78	0	6	0	6	0	6	0	42.2	203550000	0	203550000	4633700	0	4633700
Q9BSW5;H0YEN5;Q8J014;E9PQD7;Q3KQT6;P15880;O60249;Q8NI62;I3L404;A4D0Y7;E9PM36;E9PMM9;Q8N5L9;Q6IPX5	Q9BSW5;H0YEN5;Q8J014;E9PQD7;Q3KQT6;P15880;O60249;Q8NI62;I3L404;A4D0Y7;E9PM36;E9PMM9;Q8N5L9;Q6IPX5	RPS2 protein (Fragment);40S ribosomal protein S2 (Fragment);40S ribosomal protein S2	RPS2;	tr|Q9BSW5|Q9BSW5_HUMAN RPS2 protein (Fragment) OS=Homo sapiens OX=9606 GN=RPS2 PE=2 SV=2;tr|H0YEN5|H0YEN5_HUMAN 40S ribosomal protein S2 (Fragment) OS=Homo sapiens OX=9606 GN=RPS2 PE=1 SV=1;tr|Q8J014|Q8J014_HUMAN 40S ribosomal protein S2 OS=Homo sapiens OX	14	2	2	2	23.7	10.541	97	12.57	0	2	0	2	0	2	0	23.7	36805000	0	36805000	4600600	0	4600600
Q96DV6;A2A3R6;P62753;A2A3R5;Q9BZU1;A2A3R7	Q96DV6;A2A3R6;P62753;A2A3R5	40S ribosomal protein S6	RPS6;	tr|Q96DV6|Q96DV6_HUMAN 40S ribosomal protein S6 OS=Homo sapiens OX=9606 GN=RPS6 PE=2 SV=1;tr|A2A3R6|A2A3R6_HUMAN 40S ribosomal protein S6 OS=Homo sapiens OX=9606 GN=RPS6 PE=2 SV=1;sp|P62753|RS6_HUMAN 40S ribosomal protein S6 OS=Homo sapiens OX=9606 GN=RPS6	6	3	3	3	12.4	28.708	249	19.144	2	2	2	2	2	2	9.2	8	61616000	3807000	57809000	4597700	150850	4446900	29.479
H3BT71;P38159;H3BR27;H0Y6E7;A8K8A6;O75526;A0A1B0GUK8;Q2VIN3;Q96E39;H3BNC1;B4E352;Q8N7X1	H3BT71;P38159;H3BR27;H0Y6E7;A8K8A6;O75526;A0A1B0GUK8;Q2VIN3;Q96E39	RNA-binding motif protein, X chromosome;	RBMX;	tr|H3BT71|H3BT71_HUMAN RNA-binding motif protein, X chromosome OS=Homo sapiens OX=9606 GN=RBMX PE=1 SV=1;sp|P38159|RBMX_HUMAN RNA-binding motif protein, X chromosome OS=Homo sapiens OX=9606 GN=RBMX PE=1 SV=3;tr|H3BR27|H3BR27_HUMAN RNA-binding motif protein	12	6	6	6	17.9	32.197	296	43.393	0	6	0	6	0	6	0	17.9	116290000	0	116290000	4275100	0	4275100
A0A590UJP7;V9HVZ0;Q13247;A0A590UK80;A0A590UJK4;A0A590UK01;Q59GY3;A8K588;A8K644;Q59EF5;Q53F45;A0A0D9SEM4;B4DJK0;B5BU15;Q59EK7;A0A024R6D8;B4DEM8;B4DUA4;Q13243;Q08170	A0A590UJP7;V9HVZ0;Q13247;A0A590UK80;A0A590UJK4;A0A590UK01;Q59GY3;A8K588	Serine/arginine-rich-splicing factor 6;Epididymis secretory protein Li 91;	SRSF6;HEL-S-91;	tr|A0A590UJP7|A0A590UJP7_HUMAN Serine/arginine-rich-splicing factor 6 OS=Homo sapiens OX=9606 GN=SRSF6 PE=1 SV=1;tr|V9HVZ0|V9HVZ0_HUMAN Epididymis secretory protein Li 91 OS=Homo sapiens OX=9606 GN=HEL-S-91 PE=2 SV=1;sp|Q13247|SRSF6_HUMAN Serine/arginine-r	20	4	4	4	13.8	32.026	276	28.443	0	4	0	4	0	4	0	13.8	71718000	0	71718000	3984300	0	3984300
Q5VVD0;P62913;Q5VVC8;Q08ES8	Q5VVD0;P62913;Q5VVC8;Q08ES8	60S ribosomal protein L11	RPL11;	tr|Q5VVD0|Q5VVD0_HUMAN 60S ribosomal protein L11 OS=Homo sapiens OX=9606 GN=RPL11 PE=2 SV=1;sp|P62913|RL11_HUMAN 60S ribosomal protein L11 OS=Homo sapiens OX=9606 GN=RPL11 PE=1 SV=2;tr|Q5VVC8|Q5VVC8_HUMAN 60S ribosomal protein L11 OS=Homo sapiens OX=9606 G	4	5	5	5	28.7	20.252	178	30.721	0	5	0	5	0	5	0	28.7	39710000	0	39710000	3971000	0	3971000
Q4KMR3;Q12965;H0YNQ8;H0YN00;B0I1T1;Q6ZNI9;Q4LE34;O00160;H0YNB0	Q4KMR3;Q12965	MYO1E variant protein;Unconventional myosin-Ie	MYO1E	tr|Q4KMR3|Q4KMR3_HUMAN MYO1E variant protein OS=Homo sapiens OX=9606 GN=MYO1E PE=2 SV=1;sp|Q12965|MYO1E_HUMAN Unconventional myosin-Ie OS=Homo sapiens OX=9606 GN=MYO1E PE=1 SV=2	9	20	20	20	19	127.06	1108	180.96	0	20	0	20	0	20	0	19	400700000	0	400700000	3779500	0	3779500
A0A2I7N9Y9;J3KSR8;B7Z570;Q59FA2;A8K1L8;J3KTL2;Q07955	A0A2I7N9Y9;J3KSR8;B7Z570;Q59FA2;A8K1L8;J3KTL2;Q07955	Serine and arginine rich splicing factor 1 transcript variant 5 (Fragment);Serine/arginine-rich-splicing factor 1 (Fragment)	SRSF1	tr|A0A2I7N9Y9|A0A2I7N9Y9_HUMAN Serine and arginine rich splicing factor 1 transcript variant 5 (Fragment) OS=Homo sapiens OX=9606 GN=SRSF1 PE=2 SV=1;tr|J3KSR8|J3KSR8_HUMAN Serine/arginine-rich-splicing factor 1 (Fragment) OS=Homo sapiens OX=9606 GN=SRSF1 P	7	1	1	1	10.5	13.336	114	6.9685	0	1	0	1	0	1	0	10.5	18776000	0	18776000	3755200	0	3755200
Q00839;A0A1W2PPS1;B4DLR3;B3KX72;A0A1X7SBS1;A0A1W2PP35;Q96BA7;Q5RI18;A0A1W2PPH7;A0A1W2PPL4;A0A1W2PP34;A0A1W2PQL0;Q7Z4Q5;A0A1W2PQD4;A0A1W2PQ74;A0A1W2PRZ7;A0A1W2PRI6;Q9UEL2;A0A1W2PP22;A0A1W2PPE9	Q00839;A0A1W2PPS1;B4DLR3;B3KX72;A0A1X7SBS1;A0A1W2PP35;Q96BA7;Q5RI18;A0A1W2PPH7;A0A1W2PPL4;A0A1W2PP34;A0A1W2PQL0;Q7Z4Q5;A0A1W2PQD4	Heterogeneous nuclear ribonucleoprotein U;	HNRNPU;	sp|Q00839|HNRPU_HUMAN Heterogeneous nuclear ribonucleoprotein U OS=Homo sapiens OX=9606 GN=HNRNPU PE=1 SV=6;tr|A0A1W2PPS1|A0A1W2PPS1_HUMAN Heterogeneous nuclear ribonucleoprotein U OS=Homo sapiens OX=9606 GN=HNRNPU PE=1 SV=1;tr|B4DLR3|B4DLR3_HUMAN cDNA FLJ	20	12	12	12	13.7	90.583	825	105	3	11	3	11	3	11	5.2	13.7	243000000	35191000	207810000	4346900	718190	3628700	5.05256
P02545;A0A6Q8PFJ0;A0A384MQX1;Q3BDU5;W8QEH3;A0A804HL68;A0A6Q8PHQ9;Q5I6Y5;Q8N519;A0A6Q8PF80;Q5TCI8;A0A6Q8PGH0;W5X314;A0A6Q8PF59;A0A6Q8PFM1;B4DFR3;A0A6Q8PFF5	P02545;A0A6Q8PFJ0;A0A384MQX1;Q3BDU5;W8QEH3;A0A804HL68;A0A6Q8PHQ9;Q5I6Y5;Q8N519;A0A6Q8PF80;Q5TCI8;A0A6Q8PGH0	Prelamin-A/C;Epididymis secretory sperm binding protein	LMNA;	sp|P02545|LMNA_HUMAN Prelamin-A/C OS=Homo sapiens OX=9606 GN=LMNA PE=1 SV=1;tr|A0A6Q8PFJ0|A0A6Q8PFJ0_HUMAN Prelamin-A/C OS=Homo sapiens OX=9606 GN=LMNA PE=1 SV=1;tr|A0A384MQX1|A0A384MQX1_HUMAN Epididymis secretory sperm binding protein OS=Homo sapiens OX=9	17	15	15	15	25.9	74.139	664	96.793	5	14	5	14	5	14	9.2	23.6	197450000	27911000	169540000	4132100	562520	3569600	6.34573
B4DMA2;B4DGL0;A0A024RD80;P08238;Q9H6X9;A8K3W9;Q6PK50;Q58FF7;Q58FF8;G3V2J8;Q14568;Q58FF6	B4DMA2;B4DGL0;A0A024RD80;P08238;Q9H6X9;A8K3W9	cDNA FLJ54023, highly similar to Heat shock protein HSP 90-beta;cDNA FLJ53619, highly similar to Heat shock protein HSP 90-beta;		tr|B4DMA2|B4DMA2_HUMAN cDNA FLJ54023, highly similar to Heat shock protein HSP 90-beta OS=Homo sapiens OX=9606 PE=2 SV=1;tr|B4DGL0|B4DGL0_HUMAN cDNA FLJ53619, highly similar to Heat shock protein HSP 90-beta OS=Homo sapiens OX=9606 PE=2 SV=1;tr|A0A024RD80|	12	9	9	6	14.7	79.194	686	78.498	0	9	0	9	0	6	0	14.7	150560000	0	150560000	3534200	0	3534200
Q8IUL9;Q52MT0;B3VL86;Q9UP81;Q14473;B3VL05;Q9UBV6;Q4TZM4;B3VL31;F8W6P5;Q9BWU5;P68871;Q0Z944;Q9GZL9;Q9BWV6;A0A2R8Y7R2;Q6V0K9;Q3LR79;B5ANL9;D9YZU5;A0A481SHK9;Q8IZI0;A9YUX2;Q14484;C8C504;D5FZW3;Q9BXA2;E9M263;E9NGZ5;A0A2S1CVU8;B2M1S8;B7UCU6;Q9H1I6;Q9UM85;Q9UNL6;E7CYP2;A0A2R8Y7X9;Q14403;D9YZU8;D9YZU9;D3GKD8;E9PFT6;D3GKD9;D9YZU7;A0N071;D1MGQ0;A0A515HFS3;A0A650ATW2;Q14474;A0A2R3Z0D6;A0A3G5AXY7;A0A140KFU0…	Q8IUL9;Q52MT0;B3VL86;Q9UP81;Q14473;B3VL05;Q9UBV6;Q4TZM4;B3VL31;F8W6P5;Q9BWU5;P68871;Q0Z944;Q9GZL9;Q9BWV6;A0A2R8Y7R2;Q6V0K9;Q3LR79;B5ANL9;D9YZU5;A0A481SHK9;Q8IZI0;A9YUX2;Q14484;C8C504;D5FZW3;Q9BXA2;E9M263;E9NGZ5;A0A2S1CVU8;B2M1S8;B7UCU6;Q9H1I6;Q9UM85;Q9UNL6;E7CYP2;A0A2R8Y7X9;Q14403;D9YZU8;D9YZU9;D3GKD8;E9PFT6;D3GKD9;D9YZU7;A0N071;D1MGQ0;A0A515HFS3;A0A650ATW2;Q14474;A0A2R3Z0D6;A0A3G5AXY7;A0A140KFU0…	Hemoglobin beta chain variant Hb.Sinai-Bel Air (Fragment);Beta globin (Fragment);Mutant beta-globin	HBB;	tr|Q8IUL9|Q8IUL9_HUMAN Hemoglobin beta chain variant Hb.Sinai-Bel Air (Fragment) OS=Homo sapiens OX=9606 GN=HBB PE=3 SV=1;tr|Q52MT0|Q52MT0_HUMAN Beta globin (Fragment) OS=Homo sapiens OX=9606 GN=HBB PE=3 SV=1;tr|B3VL86|B3VL86_HUMAN Mutant beta-globin OS=Ho	71	2	2	2	21.9	11.548	105	12.348	1	2	1	2	1	2	12.4	21.9	30064000	3198000	26866000	3758000	399750	3358300	8.401
P84090;A0A024R6D4;G3V279	P84090;A0A024R6D4;G3V279	Enhancer of rudimentary homolog	ERH;	sp|P84090|ERH_HUMAN Enhancer of rudimentary homolog OS=Homo sapiens OX=9606 GN=ERH PE=1 SV=1;tr|A0A024R6D4|A0A024R6D4_HUMAN Enhancer of rudimentary homolog OS=Homo sapiens OX=9606 GN=ERH PE=3 SV=1;tr|G3V279|G3V279_HUMAN Enhancer of rudimentary homolog OS=H	3	4	4	4	46.2	12.259	104	37.964	0	4	0	4	0	4	0	46.2	57430000	0	57430000	3336100	0	3336100
A0A7I2V3E1;B2R5W3;A0A024R3T8;P09874;B4E0E1;A0A7I2V5E9;A0A7I2V625;Q05D33;Q6PJL0;Q96P95	A0A7I2V3E1;B2R5W3;A0A024R3T8;P09874;B4E0E1	Poly [ADP-ribose] polymerase	PARP1;	tr|A0A7I2V3E1|A0A7I2V3E1_HUMAN Poly [ADP-ribose] polymerase OS=Homo sapiens OX=9606 GN=PARP1 PE=1 SV=1;tr|B2R5W3|B2R5W3_HUMAN Poly [ADP-ribose] polymerase OS=Homo sapiens OX=9606 PE=2 SV=1;tr|A0A024R3T8|A0A024R3T8_HUMAN Poly [ADP-ribose] polymerase OS=Homo	10	9	9	9	10.7	108.19	971	59.657	1	9	1	9	1	9	1.5	10.7	241110000	3834500	237270000	3396900	64992	3331900	51.2663
B4DUR8;B3KX11;Q2TU64;Q59H77;P49368;Q5SZX6	B4DUR8;B3KX11;Q2TU64;Q59H77;P49368	T-complex protein 1 subunit gamma	CCT3;	tr|B4DUR8|B4DUR8_HUMAN T-complex protein 1 subunit gamma OS=Homo sapiens OX=9606 GN=CCT3 PE=1 SV=1;tr|B3KX11|B3KX11_HUMAN T-complex protein 1 subunit gamma OS=Homo sapiens OX=9606 PE=2 SV=1;tr|Q2TU64|Q2TU64_HUMAN T-complex protein 1 subunit gamma OS=Homo s	6	3	3	3	6	55.674	500	17.828	0	3	0	3	0	3	0	6	109510000	0	109510000	3318600	0	3318600
A0A6Q8PFE7;A0A6Q8PF43;A0A6Q8PHJ6;A0A6Q8PHA6;A0A6Q8PH65;A0A6Q8PGY2;A0A6Q8PFK8;V9HW43;A0A6Q8PGK1;P04792;A0A8E9ZT92;B4DL87	A0A6Q8PFE7;A0A6Q8PF43;A0A6Q8PHJ6;A0A6Q8PHA6;A0A6Q8PH65;A0A6Q8PGY2;A0A6Q8PFK8;V9HW43;A0A6Q8PGK1;P04792;A0A8E9ZT92;B4DL87	Heat shock protein beta-1;	HSPB1;	tr|A0A6Q8PFE7|A0A6Q8PFE7_HUMAN Heat shock protein beta-1 OS=Homo sapiens OX=9606 GN=HSPB1 PE=1 SV=1;tr|A0A6Q8PF43|A0A6Q8PF43_HUMAN Heat shock protein beta-1 OS=Homo sapiens OX=9606 GN=HSPB1 PE=1 SV=1;tr|A0A6Q8PHJ6|A0A6Q8PHJ6_HUMAN Heat shock protein beta-1	12	2	2	2	21.3	13.827	122	14.258	0	2	0	2	0	2	0	21.3	62095000	0	62095000	3259900	0	3259900
A0A140TA66;A0A0G2JQ95;A0A096LP11;Q8ND56	A0A140TA66;A0A0G2JQ95;A0A096LP11;Q8ND56	Protein LSM14 homolog A (Fragment);	LSM14A;	tr|A0A140TA66|A0A140TA66_HUMAN Protein LSM14 homolog A (Fragment) OS=Homo sapiens OX=9606 GN=LSM14A PE=1 SV=1;tr|A0A0G2JQ95|A0A0G2JQ95_HUMAN Protein LSM14 homolog A (Fragment) OS=Homo sapiens OX=9606 GN=LSM14A PE=1 SV=1;tr|A0A096LP11|A0A096LP11_HUMAN Prote	4	1	1	1	10	8.6765	80	15.143	0	1	0	1	0	1	0	10	15884000	0	15884000	3176900	0	3176900
F8VUA6;Q0QEW2;G3V203;H0YHA7;A0A024QZD1;J3QQ67;Q07020;F8VYV2;B4DDY5;A0A075B7A0	F8VUA6;Q0QEW2;G3V203;H0YHA7;A0A024QZD1;J3QQ67;Q07020;F8VYV2;B4DDY5;A0A075B7A0	60S ribosomal protein L18 (Fragment);Ribosomal protein L18 (Fragment);60S ribosomal protein L18	RPL18;	tr|F8VUA6|F8VUA6_HUMAN 60S ribosomal protein L18 (Fragment) OS=Homo sapiens OX=9606 GN=RPL18 PE=1 SV=1;tr|Q0QEW2|Q0QEW2_HUMAN Ribosomal protein L18 (Fragment) OS=Homo sapiens OX=9606 GN=RPL18 PE=2 SV=1;tr|G3V203|G3V203_HUMAN 60S ribosomal protein L18 OS=Ho	10	2	2	2	16.2	14.529	130	12.14	0	2	0	2	0	2	0	16.2	29823000	0	29823000	3169000	0	3169000
G3V3A4;Q13573;B7Z9X2;B4DY36;A0A024R6E3;Q6I9S2;B4DEG7;G3V4X8;Q6P151;Q9ULA6;Q0D2M5;G3V5R3	G3V3A4;Q13573;B7Z9X2;B4DY36;A0A024R6E3;Q6I9S2;B4DEG7;G3V4X8;Q6P151;Q9ULA6	SNW domain-containing protein 1	SNW1;	tr|G3V3A4|G3V3A4_HUMAN SNW domain-containing protein 1 OS=Homo sapiens OX=9606 GN=SNW1 PE=1 SV=1;sp|Q13573|SNW1_HUMAN SNW domain-containing protein 1 OS=Homo sapiens OX=9606 GN=SNW1 PE=1 SV=1;tr|B7Z9X2|B7Z9X2_HUMAN SNW domain-containing protein 1 OS=Homo s	12	10	10	10	17.9	65.391	571	63.202	0	10	0	10	0	10	0	17.9	150710000	0	150710000	3067200	0	3067200
E9PLD3;A0A494BXY3;L0R588;E9PRG8	E9PLD3;A0A494BXY3;L0R588;E9PRG8	Ribonuclease P protein component;Uncharacterized protein C11orf98;Alternative protein C11orf48	;C11orf98	tr|E9PLD3|E9PLD3_HUMAN Ribonuclease P protein component OS=Homo sapiens OX=9606 PE=4 SV=1;tr|A0A494BXY3|A0A494BXY3_HUMAN Uncharacterized protein C11orf98 OS=Homo sapiens OX=9606 GN=C11orf98 PE=4 SV=1;tr|L0R588|L0R588_HUMAN Alternative protein C11orf48 OS=H	4	1	1	1	13.1	11.6	99	6.414	0	1	0	1	0	1	0	13.1	15191000	0	15191000	3038200	0	3038200
F8VZX2;Q15366;A0A384N6B9;B4DRD7;H3BRU6;B4DLC0;F8W0G4;F8VXH9;F8W1G6;Q5MJP6;E9PFP8;J3QT27;P57721;F8VRH0;Q53SS8;H3BND9;H3BSS4;Q15365;F8VTZ0	F8VZX2;Q15366;A0A384N6B9;B4DRD7;H3BRU6;B4DLC0;F8W0G4;F8VXH9;F8W1G6;Q5MJP6;E9PFP8;J3QT27;P57721	Poly(rC)-binding protein 2;	PCBP2;	tr|F8VZX2|F8VZX2_HUMAN Poly(rC)-binding protein 2 OS=Homo sapiens OX=9606 GN=PCBP2 PE=1 SV=1;sp|Q15366|PCBP2_HUMAN Poly(rC)-binding protein 2 OS=Homo sapiens OX=9606 GN=PCBP2 PE=1 SV=1;tr|A0A384N6B9|A0A384N6B9_HUMAN Epididymis secretory sperm binding prote	19	4	4	4	15.3	33.8	321	26.187	1	4	1	4	1	4	4	15.3	63153000	3552100	59600000	3157600	177600	2980000	16.7793
A0A2R8Y798;K7EPM1;A8K3B0;Q6FHV6;A0A2R8Y6G6;F5H0C8;E5RGZ4;B4DUJ6;K7ERS8;K7EKN2;K7EM90;A0A2R8YEM5;E5RG95;E5RI09;A0A2R8Y879;F5H1C3;A0A2R8YEG5;A0A024R4F1;P13929;P06733;P09104	A0A2R8Y798;K7EPM1;A8K3B0;Q6FHV6;A0A2R8Y6G6;F5H0C8;E5RGZ4;B4DUJ6;K7ERS8;K7EKN2;K7EM90;A0A2R8YEM5;E5RG95;E5RI09;A0A2R8Y879;F5H1C3;A0A2R8YEG5;A0A024R4F1;P13929;P06733;P09104	Alpha-enolase;Phosphopyruvate hydratase (Fragment);Phosphopyruvate hydratase	ENO1;ENO3;	tr|A0A2R8Y798|A0A2R8Y798_HUMAN Alpha-enolase OS=Homo sapiens OX=9606 GN=ENO1 PE=1 SV=1;tr|K7EPM1|K7EPM1_HUMAN Phosphopyruvate hydratase (Fragment) OS=Homo sapiens OX=9606 GN=ENO3 PE=1 SV=1;tr|A8K3B0|A8K3B0_HUMAN Phosphopyruvate hydratase OS=Homo sapiens OX	21	1	1	1	25.7	7.9849	70	6.0343	0	1	0	1	0	1	0	25.7	8710900	0	8710900	2903600	0	2903600
Q6FGE5;D3DV26;P60903	Q6FGE5;D3DV26;P60903	Protein S100-A10 (Fragment);Protein S100-A10	S100A10;	tr|Q6FGE5|Q6FGE5_HUMAN Protein S100-A10 (Fragment) OS=Homo sapiens OX=9606 GN=S100A10 PE=2 SV=1;tr|D3DV26|D3DV26_HUMAN Protein S100-A10 (Fragment) OS=Homo sapiens OX=9606 GN=S100A10 PE=4 SV=1;sp|P60903|S10AA_HUMAN Protein S100-A10 OS=Homo sapiens OX=9606 G	3	1	1	1	10.3	11.187	97	10.489	0	1	0	1	0	1	0	10.3	14269000	0	14269000	2853700	0	2853700
Q96QL0;P39023;H7C3M2;B5MCW2;H7C422;Q9NY85;G5E9G0;B3KS36;Q8TBW1;B4DN06;F8WCR1;Q49AJ9;Q9BT63	Q96QL0;P39023;H7C3M2;B5MCW2;H7C422;Q9NY85;G5E9G0;B3KS36;Q8TBW1;B4DN06;F8WCR1	Ribosomal protein L3;60S ribosomal protein L3;60S ribosomal protein L3 (Fragment)	RPL3;	tr|Q96QL0|Q96QL0_HUMAN Ribosomal protein L3 OS=Homo sapiens OX=9606 GN=RPL3 PE=2 SV=1;sp|P39023|RL3_HUMAN 60S ribosomal protein L3 OS=Homo sapiens OX=9606 GN=RPL3 PE=1 SV=2;tr|H7C3M2|H7C3M2_HUMAN 60S ribosomal protein L3 (Fragment) OS=Homo sapiens OX=9606	13	5	5	5	9.4	46.119	403	34.495	0	5	0	5	0	5	0	9.4	62716000	0	62716000	2789700	0	2789700
F8VZ58;A8K6N6;F8VZJ2;F8VNW4;F8W0W4;A0A7I2V2K5;A0A024RB41;H0YHX9;A0A7I2V473;Q9BZK3;Q13765;E9PAV3	F8VZ58;A8K6N6;F8VZJ2;F8VNW4;F8W0W4;A0A7I2V2K5;A0A024RB41;H0YHX9;A0A7I2V473;Q9BZK3;Q13765;E9PAV3	Nascent polypeptide-associated complex subunit alpha (Fragment);cDNA FLJ76356;	NACA;	tr|F8VZ58|F8VZ58_HUMAN Nascent polypeptide-associated complex subunit alpha (Fragment) OS=Homo sapiens OX=9606 GN=NACA PE=1 SV=1;tr|A8K6N6|A8K6N6_HUMAN cDNA FLJ76356 OS=Homo sapiens OX=9606 PE=2 SV=1;tr|F8VZJ2|F8VZJ2_HUMAN Nascent polypeptide-associated co	12	1	1	1	10.3	13.597	126	6.0915	0	1	0	1	0	1	0	10.3	7977600	0	7977600	2659200	0	2659200
B7ZAF0;P07437;Q5SU16;Q6LC01;Q5JP53;A0A384NYT8;B4DY90;Q1KSF8;B3KML9;B4E052;Q9BUU9;B4DMU8;P68371;Q8IZ29;Q8N6N5;Q5ST81;Q8IWP6;B7ZAK1;A0A183YE00;Q96B85;B4DQN9;Q2NKY5;A0A075B736;A1L195;Q5SQY0;A0A384MEE3;B2R6L0;A0A024QZU2;A4UCT2;B4DE77;A1L196;B4DMJ5;A5D907;A5D906;B4DXZ5;Q9UGA2;B4DJ43;B7Z4N1;Q96HX0;P04350;Q3ZCM7;Q13885;Q9BVA1;A6NNZ2;B4DFH6;O43209;Q9H4B7	B7ZAF0;P07437;Q5SU16;Q6LC01;Q5JP53;A0A384NYT8;B4DY90;Q1KSF8;B3KML9;B4E052;Q9BUU9;B4DMU8;P68371;Q8IZ29;Q8N6N5;Q5ST81;Q8IWP6;B7ZAK1	Tubulin beta chain;	;TUBB	tr|B7ZAF0|B7ZAF0_HUMAN Tubulin beta chain OS=Homo sapiens OX=9606 PE=2 SV=1;sp|P07437|TBB5_HUMAN Tubulin beta chain OS=Homo sapiens OX=9606 GN=TUBB PE=1 SV=2;tr|Q5SU16|Q5SU16_HUMAN Tubulin beta chain OS=Homo sapiens OX=9606 GN=TUBB PE=1 SV=1;tr|Q6LC01|Q6LC	47	3	3	3	7	46.566	415	17.768	1	3	1	3	1	3	2.2	7	55127000	2720200	52406000	2756300	136010	2620300	19.2655
Q3HM38;X6R2P6;K7ESJ4;O14737	Q3HM38;X6R2P6;K7ESJ4;O14737	Programmed cell death 5 short isoform;Programmed cell death protein 5;	PDCD5;	tr|Q3HM38|Q3HM38_HUMAN Programmed cell death 5 short isoform OS=Homo sapiens OX=9606 GN=PDCD5 PE=1 SV=1;tr|X6R2P6|X6R2P6_HUMAN Programmed cell death protein 5 OS=Homo sapiens OX=9606 GN=PDCD5 PE=1 SV=1;tr|K7ESJ4|K7ESJ4_HUMAN Programmed cell death protein 5	4	1	1	1	25	4.4748	40	-2	0	1	0	1	0	1	0	25	10187000	0	10187000	2546700	0	2546700
M0R3D6;M0R1A7;M0R117;B4DM74;B2R4C0;Q02543;Q32XH3;M0R0P7;B4DM94;B4DUV3;Q53HD3;Q76N54	M0R3D6;M0R1A7;M0R117;B4DM74;B2R4C0;Q02543;Q32XH3;M0R0P7;B4DM94;B4DUV3;Q53HD3	60S ribosomal protein L18a (Fragment);60S ribosomal protein L18a	RPL18A;	tr|M0R3D6|M0R3D6_HUMAN 60S ribosomal protein L18a (Fragment) OS=Homo sapiens OX=9606 GN=RPL18A PE=1 SV=1;tr|M0R1A7|M0R1A7_HUMAN 60S ribosomal protein L18a OS=Homo sapiens OX=9606 GN=RPL18A PE=1 SV=1;tr|M0R117|M0R117_HUMAN 60S ribosomal protein L18a OS=Homo	12	3	3	3	22	16.714	141	18.281	0	3	0	3	0	3	0	22	34634000	0	34634000	2511400	0	2511400
Q5HYL6;Q9NYL9;H0YKU1;H0YNJ8;H0YNU8;Q8N2Y6;Q15911	Q5HYL6;Q9NYL9;H0YKU1;H0YNJ8	Uncharacterized protein DKFZp686E1899;Tropomodulin-3;Tropomodulin-3 (Fragment)	DKFZp686E1899;TMOD3;	tr|Q5HYL6|Q5HYL6_HUMAN Uncharacterized protein DKFZp686E1899 OS=Homo sapiens OX=9606 GN=DKFZp686E1899 PE=2 SV=1;sp|Q9NYL9|TMOD3_HUMAN Tropomodulin-3 OS=Homo sapiens OX=9606 GN=TMOD3 PE=1 SV=1;tr|H0YKU1|H0YKU1_HUMAN Tropomodulin-3 (Fragment) OS=Homo sapiens	7	6	6	6	25.3	39.554	352	52.658	0	6	0	6	0	6	0	25.3	142250000	0	142250000	2488700	0	2488700
C9JMM0;B8ZZ43;S4R2Y4;A4D177;Q13185	C9JMM0;B8ZZ43;S4R2Y4;A4D177;Q13185	Chromobox protein homolog 3 (Fragment);Chromobox homolog 3 (HP1 gamma homolog, Drosophila), isoform CRA_b;	CBX3;	tr|C9JMM0|C9JMM0_HUMAN Chromobox protein homolog 3 (Fragment) OS=Homo sapiens OX=9606 GN=CBX3 PE=1 SV=1;tr|B8ZZ43|B8ZZ43_HUMAN Chromobox homolog 3 (HP1 gamma homolog, Drosophila), isoform CRA_b OS=Homo sapiens OX=9606 GN=CBX3 PE=1 SV=1;tr|S4R2Y4|S4R2Y4_HUM	5	1	1	1	21	7.2211	62	6.3416	0	1	0	1	0	1	0	21	7298400	0	7298400	2432800	0	2432800
Q8WVW9;P49458	Q8WVW9;P49458	Similar to signal recognition particle 9kD (Fragment);Signal recognition particle 9 kDa protein	;SRP9	tr|Q8WVW9|Q8WVW9_HUMAN Similar to signal recognition particle 9kD (Fragment) OS=Homo sapiens OX=9606 PE=2 SV=1;sp|P49458|SRP09_HUMAN Signal recognition particle 9 kDa protein OS=Homo sapiens OX=9606 GN=SRP9 PE=1 SV=2	2	1	1	1	24.4	5.2561	45	6.4482	0	1	0	1	0	1	0	24.4	9510000	0	9510000	2377500	0	2377500
B4DUQ1;B4DFF1;A0A024R228;Q5EC54;P61978;Q5T6W2;B3KU16;S4R359;S4R457	B4DUQ1;B4DFF1;A0A024R228;Q5EC54;P61978;Q5T6W2;B3KU16	Heterogeneous nuclear ribonucleoprotein K;		tr|B4DUQ1|B4DUQ1_HUMAN Heterogeneous nuclear ribonucleoprotein K OS=Homo sapiens OX=9606 PE=1 SV=1;tr|B4DFF1|B4DFF1_HUMAN Heterogeneous nuclear ribonucleoprotein K OS=Homo sapiens OX=9606 PE=2 SV=1;tr|A0A024R228|A0A024R228_HUMAN Heterogeneous nuclear ribon	9	6	6	6	19.1	48.51	439	46.357	0	6	0	6	0	6	0	19.1	91591000	0	91591000	2364700	0	2364700
A0A7I2V4N1;A0A024RA28;A0A7I2V3P1;A0A7I2V4I6;A0A7I2V323;A0A384NL58;P22626;A0A7I2V4S4;A0A7I2V3P7	A0A7I2V4N1;A0A024RA28;A0A7I2V3P1;A0A7I2V4I6;A0A7I2V323;A0A384NL58;P22626;A0A7I2V4S4;A0A7I2V3P7	Heterogeneous nuclear ribonucleoproteins A2/B1;Heterogeneous nuclear ribonucleoprotein A2/B1, isoform CRA_d	HNRNPA2B1	tr|A0A7I2V4N1|A0A7I2V4N1_HUMAN Heterogeneous nuclear ribonucleoproteins A2/B1 OS=Homo sapiens OX=9606 GN=HNRNPA2B1 PE=1 SV=1;tr|A0A024RA28|A0A024RA28_HUMAN Heterogeneous nuclear ribonucleoprotein A2/B1, isoform CRA_d OS=Homo sapiens OX=9606 GN=HNRNPA2B1 PE	9	2	2	2	13.3	32.487	301	16.582	1	2	1	2	1	2	8.3	13.3	49460000	7232300	42227000	2747800	401800	2346000	5.83873
B4E1Q7;A0A7P0T9W1;Q5VVL7;A0A7P0Z494;P11182	B4E1Q7;A0A7P0T9W1;Q5VVL7;A0A7P0Z494;P11182	cDNA FLJ57294, highly similar to Lipoamide acyltransferase component of branched-chain alpha-keto acid dehydrogenase complex, mitochondrial;		tr|B4E1Q7|B4E1Q7_HUMAN cDNA FLJ57294, highly similar to Lipoamide acyltransferase component of branched-chain alpha-keto acid dehydrogenase complex, mitochondrial OS=Homo sapiens OX=9606 PE=2 SV=1;tr|A0A7P0T9W1|A0A7P0T9W1_HUMAN Lipoamide acyltransferase co	5	1	1	1	3	32.946	301	6.0432	0	1	0	1	0	1	0	3	43996000	0	43996000	2315600	0	2315600
V9HVZ4;Q2TSD0;P04406;A4UCT1;Q0QET7;E7EUT5;Q5ZEY3;B4DRV9;A0A0K0K1K1;O14556	V9HVZ4;Q2TSD0;P04406;A4UCT1;Q0QET7;E7EUT5;Q5ZEY3;B4DRV9	Glyceraldehyde-3-phosphate dehydrogenase;	HEL-S-162eP;	tr|V9HVZ4|V9HVZ4_HUMAN Glyceraldehyde-3-phosphate dehydrogenase OS=Homo sapiens OX=9606 GN=HEL-S-162eP PE=2 SV=1;tr|Q2TSD0|Q2TSD0_HUMAN Glyceraldehyde-3-phosphate dehydrogenase OS=Homo sapiens OX=9606 PE=2 SV=1;sp|P04406|G3P_HUMAN Glyceraldehyde-3-phosphat	10	6	6	6	16.4	36.053	335	37.719	1	6	1	6	1	6	2.4	16.4	51377000	4513400	46864000	2524600	237550	2287100	9.62787
Q9NRR8	Q9NRR8	CDC42 small effector protein 1	CDC42SE1	sp|Q9NRR8|C42S1_HUMAN CDC42 small effector protein 1 OS=Homo sapiens OX=9606 GN=CDC42SE1 PE=1 SV=1	1	1	1	1	15.2	8.9252	79	6.4807	0	1	0	1	0	1	0	15.2	6798000	0	6798000	2266000	0	2266000
Q9HCD5;Q5JY17	Q9HCD5	Nuclear receptor coactivator 5	NCOA5	sp|Q9HCD5|NCOA5_HUMAN Nuclear receptor coactivator 5 OS=Homo sapiens OX=9606 GN=NCOA5 PE=1 SV=2	2	6	6	6	13.1	65.536	579	42.321	0	6	0	6	0	6	0	13.1	79652000	0	79652000	2242700	0	2242700
E9PPX1;H0YD78;E9PIQ2;H0YF27;B7Z8U9;E9PRL4;B7Z5V5;B7Z5V8;Q0P6H7;Q53G41;A0A024R3J1;Q14134	E9PPX1;H0YD78;E9PIQ2;H0YF27;B7Z8U9;E9PRL4;B7Z5V5;B7Z5V8;Q0P6H7;Q53G41;A0A024R3J1;Q14134	Tripartite motif-containing protein 29 (Fragment);	TRIM29;	tr|E9PPX1|E9PPX1_HUMAN Tripartite motif-containing protein 29 (Fragment) OS=Homo sapiens OX=9606 GN=TRIM29 PE=1 SV=1;tr|H0YD78|H0YD78_HUMAN Tripartite motif-containing protein 29 (Fragment) OS=Homo sapiens OX=9606 GN=TRIM29 PE=1 SV=1;tr|E9PIQ2|E9PIQ2_HUMAN	12	1	1	1	10.6	10.577	94	6.1428	0	1	0	1	0	1	0	10.6	13279000	0	13279000	2213200	0	2213200
V9GYR6;W0NWJ0;Q3LIE5	V9GYR6;W0NWJ0;Q3LIE5	Manganese-dependent ADP-ribose/CDP-alcohol diphosphatase;	ADPRM;	tr|V9GYR6|V9GYR6_HUMAN Manganese-dependent ADP-ribose/CDP-alcohol diphosphatase OS=Homo sapiens OX=9606 GN=ADPRM PE=1 SV=1;tr|W0NWJ0|W0NWJ0_HUMAN Manganese-dependent ADP-ribose/CDP-alcohol diphosphatase OS=Homo sapiens OX=9606 GN=ADPRM PE=2 SV=1;sp|Q3LIE5|	3	1	1	1	3.4	34.057	294	-2	0	1	0	1	0	1	0	3.4	21434000	0	21434000	2143400	0	2143400
Q53G83;P23396;F2Z2S8;E9PPU1;E9PL09;E9PQ96;E9PJH4;H0YF32;E9PK82;H0YCJ7;H0YEU2;E9PQX2;Q9NQS8;H0YES8;E9PSF4;A7E2S3	Q53G83;P23396;F2Z2S8;E9PPU1;E9PL09;E9PQ96;E9PJH4;H0YF32;E9PK82;H0YCJ7;H0YEU2	40S ribosomal protein S3 (Fragment);40S ribosomal protein S3	;RPS3	tr|Q53G83|Q53G83_HUMAN 40S ribosomal protein S3 (Fragment) OS=Homo sapiens OX=9606 PE=2 SV=1;sp|P23396|RS3_HUMAN 40S ribosomal protein S3 OS=Homo sapiens OX=9606 GN=RPS3 PE=1 SV=2;tr|F2Z2S8|F2Z2S8_HUMAN 40S ribosomal protein S3 OS=Homo sapiens OX=9606 GN=R	16	6	6	6	25.9	26.689	243	41.276	1	6	1	6	1	6	3.7	25.9	51797000	3891500	47906000	2319100	204820	2114300	10.3227
D6R9W4;A0A2Z6ATB6;Q16643;B3KSQ7;D6RCR4;D6RFI1;B7Z2Z0;D6R9Q9	D6R9W4;A0A2Z6ATB6;Q16643;B3KSQ7	Drebrin (Fragment);Drebrin A;Drebrin;	DBN1;	tr|D6R9W4|D6R9W4_HUMAN Drebrin (Fragment) OS=Homo sapiens OX=9606 GN=DBN1 PE=1 SV=1;tr|A0A2Z6ATB6|A0A2Z6ATB6_HUMAN Drebrin A OS=Homo sapiens OX=9606 GN=DBN1 PE=2 SV=1;sp|Q16643|DREB_HUMAN Drebrin OS=Homo sapiens OX=9606 GN=DBN1 PE=1 SV=4;tr|B3KSQ7|B3KSQ7_H	8	5	5	5	14.8	36.471	317	33.457	0	5	0	5	0	5	0	14.8	53068000	0	53068000	2055200	0	2055200
E5RK19;E5RFI6;E5RJ04;E5RGV4;E5RHE7;E5RH52;E5RG37;E5RFP9;A0A7R6V290;H3BM24;Q5TEE2;B4DSK9;Q6IT96;B5BU61;Q13547;Q92769	E5RK19;E5RFI6;E5RJ04;E5RGV4;E5RHE7;E5RH52;E5RG37;E5RFP9;A0A7R6V290;H3BM24;Q5TEE2;B4DSK9;Q6IT96;B5BU61;Q13547;Q92769	Histone deacetylase 2 (Fragment);	HDAC2;	tr|E5RK19|E5RK19_HUMAN Histone deacetylase 2 (Fragment) OS=Homo sapiens OX=9606 GN=HDAC2 PE=1 SV=1;tr|E5RFI6|E5RFI6_HUMAN Histone deacetylase 2 (Fragment) OS=Homo sapiens OX=9606 GN=HDAC2 PE=1 SV=1;tr|E5RJ04|E5RJ04_HUMAN Histone deacetylase 2 (Fragment) OS	16	1	1	1	25	6.4786	52	7.3224	0	1	0	1	0	1	0	25	5841600	0	5841600	1947200	0	1947200
Q5JRI1;Q53GD7;A0A0S2Z504;O75494;R4GMP8;Q6IQ42;Q8WXF0	Q5JRI1;Q53GD7;A0A0S2Z504;O75494;R4GMP8;Q6IQ42;Q8WXF0	Serine/arginine-rich-splicing factor 10;FUS interacting protein (Serine-arginine rich) 1 isoform 2 variant (Fragment);	SRSF10;	tr|Q5JRI1|Q5JRI1_HUMAN Serine/arginine-rich-splicing factor 10 OS=Homo sapiens OX=9606 GN=SRSF10 PE=1 SV=1;tr|Q53GD7|Q53GD7_HUMAN FUS interacting protein (Serine-arginine rich) 1 isoform 2 variant (Fragment) OS=Homo sapiens OX=9606 PE=2 SV=1;tr|A0A0S2Z504|	7	2	2	2	13.4	20.913	172	13.142	0	2	0	2	0	2	0	13.4	32704000	0	32704000	1900200	0	1900200
E7EX53;A0A2R8Y738;B4DLP4;A0A2R8YEM3;E7EQV9;A0A024R2Q4;P61313	E7EX53;A0A2R8Y738;B4DLP4;A0A2R8YEM3;E7EQV9;A0A024R2Q4;P61313	Ribosomal protein L15 (Fragment);Ribosomal protein L15	RPL15;	tr|E7EX53|E7EX53_HUMAN Ribosomal protein L15 (Fragment) OS=Homo sapiens OX=9606 GN=RPL15 PE=1 SV=1;tr|A0A2R8Y738|A0A2R8Y738_HUMAN Ribosomal protein L15 (Fragment) OS=Homo sapiens OX=9606 GN=RPL15 PE=1 SV=1;tr|B4DLP4|B4DLP4_HUMAN Ribosomal protein L15 OS=Ho	7	1	1	1	6.8	15.722	133	6.2857	0	1	0	1	0	1	0	6.8	17092000	0	17092000	1899200	0	1899200
Q9Y383;B3KSL5;A0A0A6YYJ8;B3KRR1;Q75M91;V9GZ75;F8WEU3;B8ZZ09;B8ZZ10;A8MYV2;D3DU41;Q1W6G4;Q53G47;Q9NQ29	Q9Y383;B3KSL5;A0A0A6YYJ8;B3KRR1	Putative RNA-binding protein Luc7-like 2;cDNA FLJ36545 fis, clone TRACH2006670, highly similar to RNA-binding protein Luc7-like 2;	LUC7L2;	sp|Q9Y383|LC7L2_HUMAN Putative RNA-binding protein Luc7-like 2 OS=Homo sapiens OX=9606 GN=LUC7L2 PE=1 SV=2;tr|B3KSL5|B3KSL5_HUMAN cDNA FLJ36545 fis, clone TRACH2006670, highly similar to RNA-binding protein Luc7-like 2 OS=Homo sapiens OX=9606 PE=2 SV=1;tr|	14	5	5	5	15.6	46.513	392	34.405	2	5	2	5	2	5	6.1	15.6	62899000	13188000	49711000	2096500	217660	1878800	8.63181
A0A024R4M0;P46781;A5D904;B5MCT8;C9JM19;B7Z732;F2Z3C0;A8MXK4	A0A024R4M0;P46781;A5D904;B5MCT8;C9JM19;B7Z732	40S ribosomal protein S9;RPS9 protein (Fragment)	RPS9;	tr|A0A024R4M0|A0A024R4M0_HUMAN 40S ribosomal protein S9 OS=Homo sapiens OX=9606 GN=RPS9 PE=1 SV=1;sp|P46781|RS9_HUMAN 40S ribosomal protein S9 OS=Homo sapiens OX=9606 GN=RPS9 PE=1 SV=3;tr|A5D904|A5D904_HUMAN RPS9 protein (Fragment) OS=Homo sapiens OX=9606	8	3	3	3	14.9	22.591	194	19.525	0	3	0	3	0	3	0	14.9	31979000	0	31979000	1860800	0	1860800
E7DVW5;Q01469	E7DVW5;Q01469	Fatty acid binding protein 5 (Psoriasis-associated);Fatty acid-binding protein 5	FABP5	tr|E7DVW5|E7DVW5_HUMAN Fatty acid binding protein 5 (Psoriasis-associated) OS=Homo sapiens OX=9606 GN=FABP5 PE=3 SV=1;sp|Q01469|FABP5_HUMAN Fatty acid-binding protein 5 OS=Homo sapiens OX=9606 GN=FABP5 PE=1 SV=3	2	2	2	2	13.3	15.164	135	12.096	0	2	0	2	0	2	0	13.3	20241000	0	20241000	1840100	0	1840100
A8K0T9;P52907	A8K0T9;P52907	F-actin-capping protein subunit alpha;F-actin-capping protein subunit alpha-1	;CAPZA1	tr|A8K0T9|A8K0T9_HUMAN F-actin-capping protein subunit alpha OS=Homo sapiens OX=9606 PE=2 SV=1;sp|P52907|CAZA1_HUMAN F-actin-capping protein subunit alpha-1 OS=Homo sapiens OX=9606 GN=CAPZA1 PE=1 SV=3	2	2	2	1	9.8	32.908	286	28.229	0	2	0	2	0	1	0	9.8	50655000	0	50655000	1617500	0	1617500
B2R7T8;A0A384MR50;B1AK88;B4DWA6;P47756;B1AK87;B1AK85;A0A6I8PRV6;Q7L4N0;A0A6I8PIN8	B2R7T8;A0A384MR50;B1AK88;B4DWA6;P47756;B1AK87;B1AK85	F-actin-capping protein subunit beta;		tr|B2R7T8|B2R7T8_HUMAN F-actin-capping protein subunit beta OS=Homo sapiens OX=9606 PE=2 SV=1;tr|A0A384MR50|A0A384MR50_HUMAN F-actin-capping protein subunit beta OS=Homo sapiens OX=9606 PE=2 SV=1;tr|B1AK88|B1AK88_HUMAN F-actin-capping protein subunit beta	10	6	6	6	22.4	30.656	272	37.098	0	6	0	6	0	6	0	22.4	70275000	0	70275000	1616800	0	1616800
A6NMY6;P07355;A0A024R5Z7;V9HW65;H0YNP5;H0YMW4;H0YN42;H0YMU9;H0YMD0;B4DNH8;H0YNB8;H0YKS4;H0YM50;H0YL33;A0A7I2V4P4;H0YMM1;B3KRQ1;H0YN28;H0YKX9;H0YMT9;H0YLV6;H0YKZ7;H0YNA0;H0YMD9;H0YKL9;H0YKV8;H0YKN4;H0YLE2	A6NMY6;P07355;A0A024R5Z7;V9HW65;H0YNP5;H0YMW4;H0YN42;H0YMU9;H0YMD0;B4DNH8;H0YNB8;H0YKS4;H0YM50;H0YL33;A0A7I2V4P4;H0YMM1	Putative annexin A2-like protein;Annexin A2;Annexin	ANXA2P2;ANXA2	sp|A6NMY6|AXA2L_HUMAN Putative annexin A2-like protein OS=Homo sapiens OX=9606 GN=ANXA2P2 PE=5 SV=2;sp|P07355|ANXA2_HUMAN Annexin A2 OS=Homo sapiens OX=9606 GN=ANXA2 PE=1 SV=2;tr|A0A024R5Z7|A0A024R5Z7_HUMAN Annexin OS=Homo sapiens OX=9606 GN=ANXA2 PE=2 SV=	28	5	5	5	17.1	38.659	339	36.276	0	5	0	5	0	5	0	17.1	45735000	0	45735000	1602000	0	1602000
Q59GG3;Q6FHM5;Q01664	Q59GG3;Q6FHM5;Q01664	Transcription factor AP-4 (Activating enhancer binding protein 4) variant (Fragment);TFAP4 protein;	;TFAP4	tr|Q59GG3|Q59GG3_HUMAN Transcription factor AP-4 (Activating enhancer binding protein 4) variant (Fragment) OS=Homo sapiens OX=9606 PE=2 SV=1;tr|Q6FHM5|Q6FHM5_HUMAN TFAP4 protein OS=Homo sapiens OX=9606 GN=TFAP4 PE=2 SV=1;sp|Q01664|TFAP4_HUMAN Transcriptio	3	1	1	1	2.7	33.091	293	5.9847	0	1	0	1	0	1	0	2.7	24841000	0	24841000	1552500	0	1552500
J3KRJ2;J3KRF8;J3QR41;J3KTD6;J3QLN8;J3KT86;B2RC06;Q96GD4	J3KRJ2;J3KRF8;J3QR41;J3KTD6;J3QLN8;J3KT86;B2RC06;Q96GD4	Aurora kinase (Fragment);Aurora kinase	AURKB	tr|J3KRJ2|J3KRJ2_HUMAN Aurora kinase (Fragment) OS=Homo sapiens OX=9606 GN=AURKB PE=1 SV=8;tr|J3KRF8|J3KRF8_HUMAN Aurora kinase OS=Homo sapiens OX=9606 GN=AURKB PE=1 SV=1;tr|J3QR41|J3QR41_HUMAN Aurora kinase (Fragment) OS=Homo sapiens OX=9606 GN=AURKB PE=1	8	1	1	1	21.7	7.6758	69	9.3829	0	1	0	1	0	1	0	21.7	7672800	0	7672800	1534600	0	1534600
Q5T750	Q5T750	Skin-specific protein 32	XP32	sp|Q5T750|XP32_HUMAN Skin-specific protein 32 OS=Homo sapiens OX=9606 GN=XP32 PE=1 SV=1	1	1	1	1	3.6	26.238	250	6.0032	0	1	0	1	0	1	0	3.6	17902000	0	17902000	1491800	0	1491800
B4DFE6;B4DL14;Q8TAS0;P36542	B4DFE6;B4DL14;Q8TAS0;P36542	cDNA FLJ59861, highly similar to ATP synthase gamma chain, mitochondrial;ATP synthase subunit gamma;		tr|B4DFE6|B4DFE6_HUMAN cDNA FLJ59861, highly similar to ATP synthase gamma chain, mitochondrial OS=Homo sapiens OX=9606 PE=2 SV=1;tr|B4DL14|B4DL14_HUMAN ATP synthase subunit gamma OS=Homo sapiens OX=9606 PE=2 SV=1;tr|Q8TAS0|Q8TAS0_HUMAN ATP synthase subuni	4	2	2	2	15.4	15.726	143	12.97	0	2	0	2	0	2	0	15.4	11889000	0	11889000	1486100	0	1486100
Q15670;Q53GA7;F5H5D3;Q7Z3M3;C9J2C0;A8JZY9;P0DPH7;Q1ZYQ1;P0DPH8;B4DN58;B7Z1K5;A0A7P0T945;B3KT06;B3KPS3;B4DQK4;Q9UQM3;B4DDU2;V9GZ17;P68366;A6NHL2;Q9NY65;P68363;Q71U36;Q9BQE3	Q15670;Q53GA7;F5H5D3;Q7Z3M3;C9J2C0;A8JZY9;P0DPH7;Q1ZYQ1;P0DPH8;B4DN58;B7Z1K5;A0A7P0T945;B3KT06;B3KPS3;B4DQK4;Q9UQM3;B4DDU2;V9GZ17;P68366;A6NHL2;Q9NY65;P68363;Q71U36;Q9BQE3	Alpha-tubulin isotype H2-alpha (Fragment);Tubulin alpha chain (Fragment);Tubulin alpha chain		tr|Q15670|Q15670_HUMAN Alpha-tubulin isotype H2-alpha (Fragment) OS=Homo sapiens OX=9606 PE=3 SV=1;tr|Q53GA7|Q53GA7_HUMAN Tubulin alpha chain (Fragment) OS=Homo sapiens OX=9606 PE=2 SV=1;tr|F5H5D3|F5H5D3_HUMAN Tubulin alpha chain OS=Homo sapiens OX=9606 GN	24	1	1	1	11.2	10.899	98	6.5302	0	1	0	1	0	1	0	11.2	8791300	0	8791300	1465200	0	1465200
Q1ZYL5;F5H7S3;D9YZV7;H7BYY1;H0YKJ4;H0YK48;B7Z722;A0A494BZZ2;B7Z596;Q59GR8;H0YN06;Q07413	Q1ZYL5;F5H7S3;D9YZV7;H7BYY1;H0YKJ4;H0YK48;B7Z722;A0A494BZZ2;B7Z596;Q59GR8	Tropomyosin 1 alpha variant 6;Tropomyosin alpha-1 chain;Tropomyosin 1 (Alpha) isoform 6	;TPM1	tr|Q1ZYL5|Q1ZYL5_HUMAN Tropomyosin 1 alpha variant 6 OS=Homo sapiens OX=9606 PE=2 SV=1;tr|F5H7S3|F5H7S3_HUMAN Tropomyosin alpha-1 chain OS=Homo sapiens OX=9606 GN=TPM1 PE=1 SV=2;tr|D9YZV7|D9YZV7_HUMAN Tropomyosin 1 (Alpha) isoform 6 OS=Homo sapiens OX=9606	12	8	4	3	29.8	28.508	245	25.375	0	8	0	4	0	3	0	29.8	32148000	0	32148000	1461300	0	1461300
A0A1S5UZ17;A0A024R2K4;Q9Y608;C9JSU1;C9JJC9;C9JC17;C9J321;C9J0U5	A0A1S5UZ17;A0A024R2K4;Q9Y608;C9JSU1	Leucine-rich repeat flightless-interacting protein 2;Leucine rich repeat (In FLII) interacting protein 2, isoform CRA_b	LRRFIP2;	tr|A0A1S5UZ17|A0A1S5UZ17_HUMAN Leucine-rich repeat flightless-interacting protein 2 OS=Homo sapiens OX=9606 GN=LRRFIP2 PE=2 SV=1;tr|A0A024R2K4|A0A024R2K4_HUMAN Leucine rich repeat (In FLII) interacting protein 2, isoform CRA_b OS=Homo sapiens OX=9606 GN=LR	8	4	4	4	9.9	49.343	434	25.539	0	4	0	4	0	4	0	9.9	35061000	0	35061000	1460900	0	1460900
C9JS04;C9JZQ9;C9JEL4;P20592	C9JS04;C9JZQ9;C9JEL4;P20592	Interferon-induced GTP-binding protein Mx2 (Fragment);	MX2;	tr|C9JS04|C9JS04_HUMAN Interferon-induced GTP-binding protein Mx2 (Fragment) OS=Homo sapiens OX=9606 GN=MX2 PE=1 SV=1;tr|C9JZQ9|C9JZQ9_HUMAN Interferon-induced GTP-binding protein Mx2 (Fragment) OS=Homo sapiens OX=9606 GN=MX2 PE=1 SV=1;tr|C9JEL4|C9JEL4_HUM	4	1	1	1	5.6	14.274	125	6.1041	0	1	0	1	0	1	0	5.6	10111000	0	10111000	1444400	0	1444400
O75367;A0A8I5KRC6;B4DJC3;D6RCF2;Q59FH0;A0A8I5KS04;A0A7I2V4D9;A0A7I2YQB9;A0A7I2V423;A0A7I2V412;Q9HA11;A0A7I2V2N7;A0A7I2YQD6;Q5SQT3;A0A7I2V6E9;A0A7I2YQR8;A0A024QZP6;Q9P0M6	O75367;A0A8I5KRC6;B4DJC3;D6RCF2;Q59FH0;A0A8I5KS04	Core histone macro-H2A.1;Histone H2A	MACROH2A1;	sp|O75367|H2AY_HUMAN Core histone macro-H2A.1 OS=Homo sapiens OX=9606 GN=MACROH2A1 PE=1 SV=5;tr|A0A8I5KRC6|A0A8I5KRC6_HUMAN Core histone macro-H2A.1 OS=Homo sapiens OX=9606 GN=MACROH2A1 PE=1 SV=1;tr|B4DJC3|B4DJC3_HUMAN Histone H2A OS=Homo sapiens OX=9606 G	18	4	4	4	14.6	39.183	369	25.051	0	4	0	4	0	4	0	14.6	52109000	0	52109000	1442900	0	1442900
H0YMV8;Q71UM5;C9JLI6	H0YMV8;Q71UM5;C9JLI6	40S ribosomal protein S27;40S ribosomal protein S27-like	RPS27L;	tr|H0YMV8|H0YMV8_HUMAN 40S ribosomal protein S27 OS=Homo sapiens OX=9606 GN=RPS27L PE=1 SV=1;sp|Q71UM5|RS27L_HUMAN 40S ribosomal protein S27-like OS=Homo sapiens OX=9606 GN=RPS27L PE=1 SV=3;tr|C9JLI6|C9JLI6_HUMAN 40S ribosomal protein S27 OS=Homo sapiens O	3	3	1	1	32	11.345	100	6.0416	2	3	0	1	0	1	21	32	8652900	0	8652900	1442100	0	1442100
P11142;V9HW22;E9PKE3;B3KTV0;Q53GZ6;Q53HF2;Q96IS6;B4E1Q1;E9PLF4;E9PN89;E9PNE6;E9PI65;B4DTX2;A0A024R6B5;P54652;A0A384MDT7;E9PK54;E9PQK7;E9PQQ4;A8K7Q2;Q9NZ87;B4DFN9;B2R6X5;Q53FC7;B3KUS2;B3KSM6;A0A384NKX5;Q9NWW3;B4DNX1;E9PN25;P17066;P48741;B4DEF7;Q96BE0;B4DNV4;A4D111;E9PS65;Q96H53;E9PM13;E9PPY6;B4E1T6	P11142;V9HW22;E9PKE3;B3KTV0;Q53GZ6;Q53HF2;Q96IS6;B4E1Q1;E9PLF4;E9PN89;E9PNE6;E9PI65;B4DTX2;A0A024R6B5;P54652;A0A384MDT7	Heat shock cognate 71 kDa protein;Epididymis luminal protein 33;	HSPA8;HEL-S-72p;	sp|P11142|HSP7C_HUMAN Heat shock cognate 71 kDa protein OS=Homo sapiens OX=9606 GN=HSPA8 PE=1 SV=1;tr|V9HW22|V9HW22_HUMAN Epididymis luminal protein 33 OS=Homo sapiens OX=9606 GN=HEL-S-72p PE=2 SV=1;tr|E9PKE3|E9PKE3_HUMAN Heat shock cognate 71 kDa protein	41	5	5	3	9.9	70.897	646	31.916	1	5	1	5	1	3	1.7	9.9	62170000	3624300	58545000	1539400	97953	1441400	14.7152
A0A087WUW5;A0A0D9SF20;K7EK45;A6NLN1;A0A7I2V621;A0A0U1RRM4;P26599	A0A087WUW5;A0A0D9SF20;K7EK45;A6NLN1;A0A7I2V621;A0A0U1RRM4;P26599	Polypyrimidine tract-binding protein 1 (Fragment);Polypyrimidine tract binding protein 1, isoform CRA_e;	PTBP1;	tr|A0A087WUW5|A0A087WUW5_HUMAN Polypyrimidine tract-binding protein 1 (Fragment) OS=Homo sapiens OX=9606 GN=PTBP1 PE=1 SV=6;tr|A0A0D9SF20|A0A0D9SF20_HUMAN Polypyrimidine tract binding protein 1, isoform CRA_e OS=Homo sapiens OX=9606 GN=PTBP1 PE=1 SV=1;tr|K	7	1	1	1	9.9	9.0351	81	6.1743	0	1	0	1	0	1	0	9.9	7048300	0	7048300	1409700	0	1409700
A0A024RD78;Q6P1L8	A0A024RD78;Q6P1L8	Mitochondrial ribosomal protein L14, isoform CRA_b;39S ribosomal protein L14, mitochondrial	MRPL14	tr|A0A024RD78|A0A024RD78_HUMAN Mitochondrial ribosomal protein L14, isoform CRA_b OS=Homo sapiens OX=9606 GN=MRPL14 PE=3 SV=1;sp|Q6P1L8|RM14_HUMAN 39S ribosomal protein L14, mitochondrial OS=Homo sapiens OX=9606 GN=MRPL14 PE=1 SV=1	2	3	3	3	17.9	15.947	145	17.749	0	3	0	3	0	3	0	17.9	13909000	0	13909000	1390900	0	1390900
B4DTW7;A0A0B4J203;Q6UN15	B4DTW7;A0A0B4J203;Q6UN15	cDNA FLJ61400, highly similar to Pre-mRNA 3-end-processing factor FIP1;Pre-mRNA 3-end-processing factor FIP1;		tr|B4DTW7|B4DTW7_HUMAN cDNA FLJ61400, highly similar to Pre-mRNA 3-end-processing factor FIP1 OS=Homo sapiens OX=9606 PE=2 SV=1;tr|A0A0B4J203|A0A0B4J203_HUMAN Pre-mRNA 3-end-processing factor FIP1 OS=Homo sapiens OX=9606 PE=3 SV=1;sp|Q6UN15|FIP1_HUMAN Pr	3	1	1	1	7.7	24.131	221	7.6194	0	1	0	1	0	1	0	7.7	17006000	0	17006000	1308100	0	1308100
B4DFG0;H0Y993;A0A494C028;P35659;H0Y8X0;D6RDA2;B4DNW3;A0A494C198	B4DFG0;H0Y993;A0A494C028;P35659;H0Y8X0;D6RDA2;B4DNW3	Protein DEK;DEK oncogene (DNA binding), isoform CRA_b	DEK	tr|B4DFG0|B4DFG0_HUMAN Protein DEK OS=Homo sapiens OX=9606 GN=DEK PE=1 SV=1;tr|H0Y993|H0Y993_HUMAN DEK oncogene (DNA binding), isoform CRA_b OS=Homo sapiens OX=9606 GN=DEK PE=1 SV=2;tr|A0A494C028|A0A494C028_HUMAN Protein DEK OS=Homo sapiens OX=9606 GN=DEK	8	4	4	4	14.4	39.5	347	24.48	0	4	0	4	0	4	0	14.4	32054000	0	32054000	1280700	0	1280700
Q53R15;A0A024R2Q5;P05976;P08590	Q53R15;A0A024R2Q5;P05976;P08590	Uncharacterized protein MYL1 (Fragment);Myosin, light polypeptide 3, alkali ventricular, skeletal, slow, isoform CRA_a	MYL1;MYL3	tr|Q53R15|Q53R15_HUMAN Uncharacterized protein MYL1 (Fragment) OS=Homo sapiens OX=9606 GN=MYL1 PE=4 SV=1;tr|A0A024R2Q5|A0A024R2Q5_HUMAN Myosin, light polypeptide 3, alkali ventricular, skeletal, slow, isoform CRA_a OS=Homo sapiens OX=9606 GN=MYL3 PE=4 SV=1	4	1	1	1	11.4	15.603	140	15.379	0	1	0	1	0	1	0	11.4	44714000	0	44714000	1222900	0	1222900
B3KS48;I3L4X5;Q70CQ4	B3KS48;I3L4X5;Q70CQ4	cDNA FLJ35471 fis, clone SMINT2006708, highly similar to Homo sapiens ubiquitin specific peptidase 31 (USP31), mRNA;Ubiquitin carboxyl-terminal hydrolase 31		tr|B3KS48|B3KS48_HUMAN cDNA FLJ35471 fis, clone SMINT2006708, highly similar to Homo sapiens ubiquitin specific peptidase 31 (USP31), mRNA OS=Homo sapiens OX=9606 PE=2 SV=1;tr|I3L4X5|I3L4X5_HUMAN Ubiquitin carboxyl-terminal hydrolase 31 OS=Homo sapiens OX=	3	1	1	1	1.6	68.256	645	-2	0	1	0	1	0	1	0	1.6	55915000	0	55915000	1189700	0	1189700
B4DDX2;B2R7B5;Q07666;B4E043	B4DDX2;B2R7B5;Q07666;B4E043	cDNA FLJ54590, highly similar to KH domain-containing, RNA-binding, signaltransduction-associated protein 1;		tr|B4DDX2|B4DDX2_HUMAN cDNA FLJ54590, highly similar to KH domain-containing, RNA-binding, signaltransduction-associated protein 1 OS=Homo sapiens OX=9606 PE=2 SV=1;tr|B2R7B5|B2R7B5_HUMAN cDNA, FLJ93365, highly similar to Homo sapiens KH domain containing,	4	4	4	4	9.2	46.459	423	26.991	0	4	0	4	0	4	0	9.2	92736000	0	92736000	1164600	0	1164600
B3KM90;Q643R0;Q9ULW0;Q96FC3	B3KM90;Q643R0;Q9ULW0	cDNA FLJ10529 fis, clone NT2RP2000965, highly similar to Targeting protein for Xklp2;HCTP4;	;HCTP4	tr|B3KM90|B3KM90_HUMAN cDNA FLJ10529 fis, clone NT2RP2000965, highly similar to Targeting protein for Xklp2 OS=Homo sapiens OX=9606 PE=2 SV=1;tr|Q643R0|Q643R0_HUMAN HCTP4 OS=Homo sapiens OX=9606 GN=HCTP4 PE=2 SV=1;sp|Q9ULW0|TPX2_HUMAN Targeting protein for	4	5	5	5	10.1	69.758	605	33.518	1	5	1	5	1	5	2	10.1	71840000	3952900	67887000	1257200	104020	1153200	11.0863
P05141;Q6NVC0	P05141;Q6NVC0	ADP/ATP translocase 2;ADP/ATP translocase (Fragment)	SLC25A5	sp|P05141|ADT2_HUMAN ADP/ATP translocase 2 OS=Homo sapiens OX=9606 GN=SLC25A5 PE=1 SV=7;tr|Q6NVC0|Q6NVC0_HUMAN ADP/ATP translocase (Fragment) OS=Homo sapiens OX=9606 GN=SLC25A5 PE=2 SV=1	2	2	2	2	7.4	32.852	298	12.423	0	2	0	2	0	2	0	7.4	54166000	0	54166000	1081300	0	1081300
G3XAI9;B3KWP5;B2RXJ1;Q5BKY9;Q8N9E0	G3XAI9;B3KWP5;B2RXJ1;Q5BKY9;Q8N9E0	Protein FAM133B;cDNA FLJ43509 fis, clone PERIC2003699;FAM133B protein	FAM133B;MGC40405;	tr|G3XAI9|G3XAI9_HUMAN Protein FAM133B OS=Homo sapiens OX=9606 GN=FAM133B PE=1 SV=1;tr|B3KWP5|B3KWP5_HUMAN cDNA FLJ43509 fis, clone PERIC2003699 OS=Homo sapiens OX=9606 GN=MGC40405 PE=2 SV=1;tr|B2RXJ1|B2RXJ1_HUMAN FAM133B protein OS=Homo sapiens OX=9606 GN	5	1	1	1	10.5	12.41	105	5.978	0	1	0	1	0	1	0	10.5	6372900	0	6372900	1062200	0	1062200
A0A7I2V4J2;A8K525;A0A0S2Z4Z9;A0A7I2V5Y7;A0A7I2V535;Q15233;C9IZL7;H7C367;A0A7I2V4N2;A0A7I2V464;A0A7I2V4K9;A0A7P0MRW0;A0A7I2YQK8;A0A0S2Z4E7;C9JYS8	A0A7I2V4J2;A8K525;A0A0S2Z4Z9;A0A7I2V5Y7;A0A7I2V535;Q15233;C9IZL7;H7C367;A0A7I2V4N2;A0A7I2V464;A0A7I2V4K9;A0A7P0MRW0	Non-POU domain-containing octamer-binding protein;cDNA FLJ76817, highly similar to Homo sapiens non-POU domain containing, octamer-binding (NONO), mRNA	NONO;	tr|A0A7I2V4J2|A0A7I2V4J2_HUMAN Non-POU domain-containing octamer-binding protein OS=Homo sapiens OX=9606 GN=NONO PE=1 SV=1;tr|A8K525|A8K525_HUMAN cDNA FLJ76817, highly similar to Homo sapiens non-POU domain containing, octamer-binding (NONO), mRNA OS=Homo	15	3	3	3	6.8	53.818	468	17.857	1	2	1	2	1	2	2.6	4.3	27044000	0	27044000	1040200	0	1040200
Q6FGH9;P63167;F8VXL2;F8VRV5;Q96FJ2	Q6FGH9;P63167;F8VXL2;F8VRV5;Q96FJ2	Dynein light chain;Dynein light chain 1, cytoplasmic	DNCL1;DYNLL1;	tr|Q6FGH9|Q6FGH9_HUMAN Dynein light chain OS=Homo sapiens OX=9606 GN=DNCL1 PE=2 SV=1;sp|P63167|DYL1_HUMAN Dynein light chain 1, cytoplasmic OS=Homo sapiens OX=9606 GN=DYNLL1 PE=1 SV=1;tr|F8VXL2|F8VXL2_HUMAN Dynein light chain OS=Homo sapiens OX=9606 GN=DYN	5	2	2	2	25.8	10.366	89	11.611	0	2	0	2	0	2	0	25.8	14376000	0	14376000	1018700	0	1018700
P31943;E7EN40;A0A384MEJ3;E9PCY7;D6RBM0;D6RIU0;G8JLB6;D6RAM1;D6RIH9;P55795;A0A384MDT2;B4DFK9;H0YB39;E5RGH4;D6RJ04;E5RGV0;D6RDU3;D6RDL0;E7EQJ0;D6RIT2;D6RFM3;D6R9T0;D6RF17	P31943;E7EN40;A0A384MEJ3;E9PCY7;D6RBM0;D6RIU0;G8JLB6;D6RAM1;D6RIH9;P55795;A0A384MDT2;B4DFK9;H0YB39;E5RGH4;D6RJ04;E5RGV0;D6RDU3;D6RDL0;E7EQJ0;D6RIT2;D6RFM3;D6R9T0;D6RF17	Heterogeneous nuclear ribonucleoprotein H;Heterogeneous nuclear ribonucleoprotein H (Fragment);	HNRNPH1;	sp|P31943|HNRH1_HUMAN Heterogeneous nuclear ribonucleoprotein H OS=Homo sapiens OX=9606 GN=HNRNPH1 PE=1 SV=4;tr|E7EN40|E7EN40_HUMAN Heterogeneous nuclear ribonucleoprotein H (Fragment) OS=Homo sapiens OX=9606 GN=HNRNPH1 PE=1 SV=1;tr|A0A384MEJ3|A0A384MEJ3_H	23	2	2	2	5.8	49.229	449	22.135	0	2	0	2	0	2	0	5.8	26324000	0	26324000	1012500	0	1012500
H9ZYJ2;P10599	H9ZYJ2;P10599	Thioredoxin	TXN	tr|H9ZYJ2|H9ZYJ2_HUMAN Thioredoxin OS=Homo sapiens OX=9606 GN=TXN PE=2 SV=1;sp|P10599|THIO_HUMAN Thioredoxin OS=Homo sapiens OX=9606 GN=TXN PE=1 SV=3	2	1	1	1	10.5	11.737	105	6.338	0	1	0	1	0	1	0	10.5	6729500	0	6729500	961360	0	961360
Q6PKC2;Q86Y74;B4DJ96;A8K3C5;J3KPP4;O95232;D6RHH0;U3KQT3;D6RDI2	Q6PKC2;Q86Y74;B4DJ96;A8K3C5;J3KPP4;O95232;D6RHH0;U3KQT3;D6RDI2	CROP protein (Fragment);	CROP;	tr|Q6PKC2|Q6PKC2_HUMAN CROP protein (Fragment) OS=Homo sapiens OX=9606 GN=CROP PE=2 SV=1;tr|Q86Y74|Q86Y74_HUMAN CROP protein (Fragment) OS=Homo sapiens OX=9606 GN=CROP PE=2 SV=1;tr|B4DJ96|B4DJ96_HUMAN cDNA FLJ59548, highly similar to Cisplatin resistance-a	9	2	2	2	10.6	27.016	236	12.159	0	2	0	2	0	2	0	10.6	14869000	0	14869000	929310	0	929310
B2R4M6;P06702	B2R4M6;P06702	Protein S100;Protein S100-A9	;S100A9	tr|B2R4M6|B2R4M6_HUMAN Protein S100 OS=Homo sapiens OX=9606 PE=2 SV=1;sp|P06702|S10A9_HUMAN Protein S100-A9 OS=Homo sapiens OX=9606 GN=S100A9 PE=1 SV=1	2	4	4	4	42.1	13.21	114	29.2	0	4	0	4	0	4	0	42.1	59739000	0	59739000	926360	0	926360
Q2F838;B4DSR4;B4DUK7;Q53YD7;P26641	Q2F838;B4DSR4;B4DUK7;Q53YD7;P26641	Eukaryotic translation elongation factor 1 gamma (Fragment);cDNA FLJ59973, highly similar to Elongation factor 1-gamma;		tr|Q2F838|Q2F838_HUMAN Eukaryotic translation elongation factor 1 gamma (Fragment) OS=Homo sapiens OX=9606 PE=2 SV=1;tr|B4DSR4|B4DSR4_HUMAN cDNA FLJ59973, highly similar to Elongation factor 1-gamma OS=Homo sapiens OX=9606 PE=2 SV=1;tr|B4DUK7|B4DUK7_HUMAN	5	1	1	1	14.9	9.6306	87	6.3495	0	1	0	1	0	1	0	14.9	4454400	0	4454400	890890	0	890890
B4DWU3	B4DWU3	Palmitoyl-protein thioesterase 1		tr|B4DWU3|B4DWU3_HUMAN Palmitoyl-protein thioesterase 1 OS=Homo sapiens OX=9606 PE=2 SV=1	1	1	1	1	2.6	26.054	232	6.3157	0	1	0	1	0	1	0	2.6	9650900	0	9650900	877350	0	877350
P07305	P07305	Histone H1.0	H1-0	sp|P07305|H10_HUMAN Histone H1.0 OS=Homo sapiens OX=9606 GN=H1-0 PE=1 SV=3	1	1	1	1	6.7	20.863	194	6.2839	0	1	0	1	0	1	0	6.7	6081300	0	6081300	868760	0	868760
P62906;Q1JQ76;A0A024RCW3	P62906;Q1JQ76;A0A024RCW3	60S ribosomal protein L10a;Ribosomal protein (Fragment);Ribosomal protein	RPL10A;	sp|P62906|RL10A_HUMAN 60S ribosomal protein L10a OS=Homo sapiens OX=9606 GN=RPL10A PE=1 SV=2;tr|Q1JQ76|Q1JQ76_HUMAN Ribosomal protein (Fragment) OS=Homo sapiens OX=9606 GN=RPL10A PE=2 SV=1;tr|A0A024RCW3|A0A024RCW3_HUMAN Ribosomal protein OS=Homo sapiens OX	3	2	2	2	12.4	24.831	217	12.465	0	2	0	2	0	2	0	12.4	16698000	0	16698000	862820	0	862820
B2R704;Q14244;B7Z3Y3;B7Z3E1;A0A087WZ40;B7ZB64	B2R704;Q14244;B7Z3Y3;B7Z3E1;A0A087WZ40;B7ZB64	cDNA, FLJ93207, highly similar to Homo sapiens microtubule-associated protein 7 (MAP7), mRNA;Ensconsin;	;MAP7	tr|B2R704|B2R704_HUMAN cDNA, FLJ93207, highly similar to Homo sapiens microtubule-associated protein 7 (MAP7), mRNA OS=Homo sapiens OX=9606 PE=2 SV=1;sp|Q14244|MAP7_HUMAN Ensconsin OS=Homo sapiens OX=9606 GN=MAP7 PE=1 SV=1;tr|B7Z3Y3|B7Z3Y3_HUMAN cDNA FLJ50	6	4	4	4	6	83.982	749	24.264	1	4	1	4	1	4	1.5	6	39365000	6036900	33328000	1009400	154790	854560	5.52077
Q96BS4;P22087;M0R2U2;M0R1H0;M0R2B0;M0R0P1;M0R299;M0QXL5;M0R2Q4;B4DLD4	Q96BS4;P22087;M0R2U2;M0R1H0;M0R2B0;M0R0P1;M0R299;M0QXL5;M0R2Q4;B4DLD4	FBL protein (Fragment);rRNA 2-O-methyltransferase fibrillarin;	FBL;	tr|Q96BS4|Q96BS4_HUMAN FBL protein (Fragment) OS=Homo sapiens OX=9606 GN=FBL PE=2 SV=2;sp|P22087|FBRL_HUMAN rRNA 2-O-methyltransferase fibrillarin OS=Homo sapiens OX=9606 GN=FBL PE=1 SV=2;tr|M0R2U2|M0R2U2_HUMAN rRNA 2-O-methyltransferase fibrillarin (Fra	10	5	5	5	22.7	28.449	260	32.556	1	5	1	5	1	5	5.4	22.7	45630000	3125700	42505000	819840	173650	819840	4.72122
Q5QP23;A0A0U1RQH7;H0Y4X3;B7Z4L7;Q6N037;Q7Z3L0;E1P5S2;G3XAC6;B4DRA0;B4DLM0;B3KWX7;Q68DD9;B4E1M7;A0A384NQ03;Q14498	Q5QP23;A0A0U1RQH7;H0Y4X3;B7Z4L7;Q6N037;Q7Z3L0;E1P5S2;G3XAC6;B4DRA0;B4DLM0;B3KWX7;Q68DD9;B4E1M7;A0A384NQ03;Q14498	RNA-binding protein 39 (Fragment);	RBM39;	tr|Q5QP23|Q5QP23_HUMAN RNA-binding protein 39 (Fragment) OS=Homo sapiens OX=9606 GN=RBM39 PE=1 SV=1;tr|A0A0U1RQH7|A0A0U1RQH7_HUMAN RNA-binding protein 39 (Fragment) OS=Homo sapiens OX=9606 GN=RBM39 PE=1 SV=1;tr|H0Y4X3|H0Y4X3_HUMAN RNA-binding protein 39 (F	15	1	1	1	6.5	27.081	231	6.5523	0	1	0	1	0	1	0	6.5	8135900	0	8135900	813590	0	813590
G3V5A4;G3V401;G3V2X0;Q0VGA3;Q9Y5B9	G3V5A4;G3V401;G3V2X0;Q0VGA3;Q9Y5B9	FACT complex subunit;FACT complex subunit SPT16	SUPT16H;	tr|G3V5A4|G3V5A4_HUMAN FACT complex subunit OS=Homo sapiens OX=9606 GN=SUPT16H PE=1 SV=1;tr|G3V401|G3V401_HUMAN FACT complex subunit OS=Homo sapiens OX=9606 GN=SUPT16H PE=1 SV=1;tr|G3V2X0|G3V2X0_HUMAN FACT complex subunit SPT16 OS=Homo sapiens OX=9606 GN=S	5	1	1	1	16.7	7.5553	66	6.9799	0	1	0	1	0	1	0	16.7	4025600	0	4025600	805120	0	805120
A0A669KBC9;A0A669KBL4;G5EA50;B3KXA1;Q6ZN18;P20800	A0A669KBC9;A0A669KBL4;G5EA50;B3KXA1;Q6ZN18;P20800	Zinc finger protein AEBP2;	AEBP2;	tr|A0A669KBC9|A0A669KBC9_HUMAN Zinc finger protein AEBP2 OS=Homo sapiens OX=9606 GN=AEBP2 PE=1 SV=1;tr|A0A669KBL4|A0A669KBL4_HUMAN Zinc finger protein AEBP2 OS=Homo sapiens OX=9606 GN=AEBP2 PE=1 SV=1;tr|G5EA50|G5EA50_HUMAN AE binding protein 2, isoform CRA	6	2	2	2	3.5	28.506	257	11.543	1	1	1	1	1	1	3.5	2.7	12463000	0	12463000	778960	0	778960
H0YKH2;H7C3F4;A0A024R5U7;A0A024R5X3;Q9NWH9	H0YKH2;H7C3F4;A0A024R5U7;A0A024R5X3;Q9NWH9	SAFB-like transcription modulator (Fragment);	SLTM;	tr|H0YKH2|H0YKH2_HUMAN SAFB-like transcription modulator (Fragment) OS=Homo sapiens OX=9606 GN=SLTM PE=1 SV=1;tr|H7C3F4|H7C3F4_HUMAN SAFB-like transcription modulator (Fragment) OS=Homo sapiens OX=9606 GN=SLTM PE=1 SV=1;tr|A0A024R5U7|A0A024R5U7_HUMAN SAFB-	5	1	1	1	11	10.815	100	6.0022	0	1	0	1	0	1	0	11	5386400	0	5386400	769480	0	769480
A0A0B4J1Z1;B4DEK2;C9JAB2;Q16629;Q8NB80;F8WEA1	A0A0B4J1Z1;B4DEK2;C9JAB2;Q16629;Q8NB80	Serine/arginine-rich-splicing factor 7;cDNA FLJ59182, highly similar to Splicing factor, arginine/serine-rich 7;	SRSF7;	tr|A0A0B4J1Z1|A0A0B4J1Z1_HUMAN Serine/arginine-rich-splicing factor 7 OS=Homo sapiens OX=9606 GN=SRSF7 PE=1 SV=1;tr|B4DEK2|B4DEK2_HUMAN cDNA FLJ59182, highly similar to Splicing factor, arginine/serine-rich 7 OS=Homo sapiens OX=9606 PE=2 SV=1;tr|C9JAB2|C9J	6	5	5	5	47.4	15.763	137	42.614	0	5	0	5	0	5	0	47.4	45737000	0	45737000	759980	0	759980
M0QYU7	M0QYU7	Upstream stimulatory factor 2 (Fragment)	USF2	tr|M0QYU7|M0QYU7_HUMAN Upstream stimulatory factor 2 (Fragment) OS=Homo sapiens OX=9606 GN=USF2 PE=1 SV=1	1	1	1	1	8.7	17.216	149	6.1373	0	1	0	1	0	1	0	8.7	70062000	0	70062000	756750	0	756750
F8VQE1;B4DN52;Q53GG0;Q9UHB6;F8VS07;B3KTW2;F8VRN8	F8VQE1;B4DN52;Q53GG0;Q9UHB6;F8VS07;B3KTW2	LIM domain and actin-binding protein 1;cDNA FLJ55990, highly similar to LIM domain and actin-binding protein 1;	LIMA1;	tr|F8VQE1|F8VQE1_HUMAN LIM domain and actin-binding protein 1 OS=Homo sapiens OX=9606 GN=LIMA1 PE=1 SV=1;tr|B4DN52|B4DN52_HUMAN cDNA FLJ55990, highly similar to LIM domain and actin-binding protein 1 OS=Homo sapiens OX=9606 PE=2 SV=1;tr|Q53GG0|Q53GG0_HUMAN	7	5	5	5	10	66.99	598	33.323	0	5	0	5	0	5	0	10	47480000	0	47480000	739460	0	739460
H3BV80;H3BMS0;H3BMM9;H3BTC0;D3DU92;A0A024R9P1;Q15287	H3BV80;H3BMS0;H3BMM9;H3BTC0;D3DU92;A0A024R9P1;Q15287	RNA-binding protein with serine-rich domain 1;	RNPS1;	tr|H3BV80|H3BV80_HUMAN RNA-binding protein with serine-rich domain 1 OS=Homo sapiens OX=9606 GN=RNPS1 PE=1 SV=2;tr|H3BMS0|H3BMS0_HUMAN RNA-binding protein with serine-rich domain 1 OS=Homo sapiens OX=9606 GN=RNPS1 PE=1 SV=1;tr|H3BMM9|H3BMM9_HUMAN RNA-bindi	7	2	2	2	7.6	24.561	211	14.507	0	2	0	2	0	2	0	7.6	11627000	0	11627000	737750	0	737750
E5RGE1;Q6LD62;E5RIR4;E9PD24;E7EVZ2;E7ESK7;D0PNI1;E7EX29;P63104	E5RGE1;Q6LD62;E5RIR4;E9PD24;E7EVZ2;E7ESK7;D0PNI1;E7EX29;P63104	14-3-3 protein zeta/delta (Fragment);14-3-3 protein protein ( cytosolic phospholipase A2protein ) (Fragment);	YWHAZ;14-3-3;	tr|E5RGE1|E5RGE1_HUMAN 14-3-3 protein zeta/delta (Fragment) OS=Homo sapiens OX=9606 GN=YWHAZ PE=1 SV=8;tr|Q6LD62|Q6LD62_HUMAN 14-3-3 protein protein ( cytosolic phospholipase A2protein ) (Fragment) OS=Homo sapiens OX=9606 GN=14-3-3 protein PE=2 SV=1;tr|E5R	9	1	1	1	27.5	5.7634	51	6.3221	0	1	0	1	0	1	0	27.5	3584200	0	3584200	716850	0	716850
Q8NHW5;F8VU65;A8K4Z4;Q53HW2;Q53HK9;F8VWS0;F8VS58;Q6NSF2;F8VZS0;G3V210;F8VRK7;F8VQY6;A0A024RBS2;P05388;F8VW21;B4E3D5;F8VPE8;F8VWV4	Q8NHW5;F8VU65;A8K4Z4;Q53HW2;Q53HK9;F8VWS0;F8VS58;Q6NSF2;F8VZS0;G3V210;F8VRK7;F8VQY6;A0A024RBS2;P05388;F8VW21;B4E3D5;F8VPE8;F8VWV4	60S acidic ribosomal protein P0-like;60S acidic ribosomal protein P0 (Fragment);	RPLP0P6;RPLP0;	sp|Q8NHW5|RLA0L_HUMAN 60S acidic ribosomal protein P0-like OS=Homo sapiens OX=9606 GN=RPLP0P6 PE=5 SV=1;tr|F8VU65|F8VU65_HUMAN 60S acidic ribosomal protein P0 (Fragment) OS=Homo sapiens OX=9606 GN=RPLP0 PE=1 SV=1;tr|A8K4Z4|A8K4Z4_HUMAN 60S acidic ribosomal	18	2	2	2	6.6	34.364	317	11.706	0	2	0	2	0	2	0	6.6	11992000	0	11992000	666240	0	666240
C9JUG7;F8W9N7;Q53GE2;Q53GC7;A4D0V4;P47755	C9JUG7;F8W9N7;Q53GE2;Q53GC7;A4D0V4;P47755	F-actin-capping protein subunit alpha;	CAPZA2;	tr|C9JUG7|C9JUG7_HUMAN F-actin-capping protein subunit alpha OS=Homo sapiens OX=9606 GN=CAPZA2 PE=1 SV=1;tr|F8W9N7|F8W9N7_HUMAN F-actin-capping protein subunit alpha OS=Homo sapiens OX=9606 GN=CAPZA2 PE=1 SV=1;tr|Q53GE2|Q53GE2_HUMAN F-actin-capping protein	6	2	1	1	16.4	16.698	146	6.4065	0	2	0	1	0	1	0	16.4	5975800	0	5975800	663970	0	663970
F5H4E5;Q5HYC2	F5H4E5;Q5HYC2	Uncharacterized protein KIAA2026 (Fragment);Uncharacterized protein KIAA2026	KIAA2026	tr|F5H4E5|F5H4E5_HUMAN Uncharacterized protein KIAA2026 (Fragment) OS=Homo sapiens OX=9606 GN=KIAA2026 PE=1 SV=1;sp|Q5HYC2|K2026_HUMAN Uncharacterized protein KIAA2026 OS=Homo sapiens OX=9606 GN=KIAA2026 PE=2 SV=2	2	1	1	1	1.1	70.079	617	6.2616	0	1	0	1	0	1	0	1.1	24547000	0	24547000	663420	0	663420
E9PJA7;Q6DCA8;A0A1W2PQ43;E9PK09;E9PQN2;E9PKI6;E9PK91;Q9NYF8;H0YF00	E9PJA7;Q6DCA8;A0A1W2PQ43;E9PK09;E9PQN2;E9PKI6;E9PK91;Q9NYF8	Bcl-2-associated transcription factor 1;BCLAF1 protein (Fragment);	BCLAF1;	tr|E9PJA7|E9PJA7_HUMAN Bcl-2-associated transcription factor 1 OS=Homo sapiens OX=9606 GN=BCLAF1 PE=1 SV=1;tr|Q6DCA8|Q6DCA8_HUMAN BCLAF1 protein (Fragment) OS=Homo sapiens OX=9606 GN=BCLAF1 PE=2 SV=1;tr|A0A1W2PQ43|A0A1W2PQ43_HUMAN Bcl-2-associated transcri	9	3	3	3	7.1	52.917	467	17.331	0	3	0	3	0	3	0	7.1	18767000	0	18767000	660840	0	660840
I3L3P7;I3L246;B2R4W8;A8K7H3;H3BN98;P62244;H3BV27;H3BT37;I3L303	I3L3P7;I3L246;B2R4W8;A8K7H3;H3BN98;P62244;H3BV27;H3BT37;I3L303	40S ribosomal protein S15a	RPS15A;	tr|I3L3P7|I3L3P7_HUMAN 40S ribosomal protein S15a OS=Homo sapiens OX=9606 GN=RPS15A PE=1 SV=1;tr|I3L246|I3L246_HUMAN 40S ribosomal protein S15a OS=Homo sapiens OX=9606 GN=RPS15A PE=1 SV=1;tr|B2R4W8|B2R4W8_HUMAN 40S ribosomal protein S15a OS=Homo sapiens OX	9	2	2	2	23	11.477	100	12.931	0	2	0	2	0	2	0	23	10734000	0	10734000	644880	0	644880
Q02413	Q02413	Desmoglein-1	DSG1	sp|Q02413|DSG1_HUMAN Desmoglein-1 OS=Homo sapiens OX=9606 GN=DSG1 PE=1 SV=2	1	5	5	5	6.6	113.75	1049	32.078	0	5	0	5	0	5	0	6.6	51295000	0	51295000	638290	0	638290
E9PR23;E9PRA4;E9PNU3;E9PQC8;Q71H61	E9PR23;E9PRA4;E9PNU3;E9PQC8;Q71H61	Immunoglobulin-like domain-containing receptor 2;	ILDR2;	tr|E9PR23|E9PR23_HUMAN Immunoglobulin-like domain-containing receptor 2 OS=Homo sapiens OX=9606 GN=ILDR2 PE=1 SV=1;tr|E9PRA4|E9PRA4_HUMAN Immunoglobulin-like domain-containing receptor 2 OS=Homo sapiens OX=9606 GN=ILDR2 PE=1 SV=1;tr|E9PNU3|E9PNU3_HUMAN Imm	5	1	1	1	2.5	58.07	512	-2	0	1	0	1	0	1	0	2.5	20702000	0	20702000	627330	0	627330
P41091;Q2VIR3	P41091;Q2VIR3	Eukaryotic translation initiation factor 2 subunit 3;Eukaryotic translation initiation factor 2 subunit 3B	EIF2S3;EIF2S3B	sp|P41091|IF2G_HUMAN Eukaryotic translation initiation factor 2 subunit 3 OS=Homo sapiens OX=9606 GN=EIF2S3 PE=1 SV=3;sp|Q2VIR3|IF2GL_HUMAN Eukaryotic translation initiation factor 2 subunit 3B OS=Homo sapiens OX=9606 GN=EIF2S3B PE=2 SV=2	2	2	2	2	6.4	51.109	472	14.079	0	2	0	2	0	2	0	6.4	15561000	0	15561000	622420	0	622420
L8E8T6	L8E8T6	Alternative protein MMRN2	MMRN2	tr|L8E8T6|L8E8T6_HUMAN Alternative protein MMRN2 OS=Homo sapiens OX=9606 GN=MMRN2 PE=4 SV=1	1	1	1	1	17.9	8.7975	78	6.1971	0	1	0	1	0	1	0	17.9	3056000	0	3056000	611190	0	611190
A0A087X1B7;Q5T7Y7;X6R700;Q9Y3Y2	A0A087X1B7;Q5T7Y7;X6R700;Q9Y3Y2	Chromatin target of PRMT1 protein;	CHTOP;	tr|A0A087X1B7|A0A087X1B7_HUMAN Chromatin target of PRMT1 protein OS=Homo sapiens OX=9606 GN=CHTOP PE=1 SV=1;tr|Q5T7Y7|Q5T7Y7_HUMAN Chromatin target of PRMT1 protein OS=Homo sapiens OX=9606 GN=CHTOP PE=1 SV=1;tr|X6R700|X6R700_HUMAN Chromatin target of PRMT1	4	1	1	1	21.1	8.5199	76	6.503	0	1	0	1	0	1	0	21.1	4209700	0	4209700	601380	0	601380
B3KM36;B3KN59;O95816	B3KM36;B3KN59;O95816	cDNA FLJ10153 fis, clone HEMBA1003417, highly similar to BAG family molecular chaperone regulator 2;		tr|B3KM36|B3KM36_HUMAN cDNA FLJ10153 fis, clone HEMBA1003417, highly similar to BAG family molecular chaperone regulator 2 OS=Homo sapiens OX=9606 PE=2 SV=1;tr|B3KN59|B3KN59_HUMAN cDNA FLJ13673 fis, clone PLACE1011858, highly similar to BAG family molecula	3	1	1	1	5.2	23.712	211	8.6147	0	1	0	1	0	1	0	5.2	9422200	0	9422200	588890	0	588890
B4E0S6;O43143	B4E0S6;O43143	RNA helicase;ATP-dependent RNA helicase DHX15	;DHX15	tr|B4E0S6|B4E0S6_HUMAN RNA helicase OS=Homo sapiens OX=9606 PE=2 SV=1;sp|O43143|DHX15_HUMAN ATP-dependent RNA helicase DHX15 OS=Homo sapiens OX=9606 GN=DHX15 PE=1 SV=2	2	6	6	6	7.7	89.546	784	39.81	0	6	0	6	0	6	0	7.7	45633000	0	45633000	557140	0	557140
A0A0S2Z3R6;Q13751	A0A0S2Z3R6;Q13751	Laminin beta 3 isoform 1 (Fragment);Laminin subunit beta-3	LAMB3	tr|A0A0S2Z3R6|A0A0S2Z3R6_HUMAN Laminin beta 3 isoform 1 (Fragment) OS=Homo sapiens OX=9606 GN=LAMB3 PE=2 SV=1;sp|Q13751|LAMB3_HUMAN Laminin subunit beta-3 OS=Homo sapiens OX=9606 GN=LAMB3 PE=1 SV=1	2	1	1	1	0.8	129.57	1172	6.2052	0	1	0	1	0	1	0	0.8	36791000	0	36791000	533210	0	533210
B3KTU7;A0A804HK74;F2Z2B9;B3KRS1;B4DS45;A0A804HI27;A0A804HL95;A0A804HJQ4;A0A804HJS9;Q53EQ3;A0A804HJ08;A0A804HJH7;Q9BSJ2	B3KTU7;A0A804HK74;F2Z2B9;B3KRS1;B4DS45;A0A804HI27;A0A804HL95;A0A804HJQ4;A0A804HJS9;Q53EQ3;A0A804HJ08;A0A804HJH7;Q9BSJ2	Gamma-tubulin complex component	;TUBGCP2	tr|B3KTU7|B3KTU7_HUMAN Gamma-tubulin complex component OS=Homo sapiens OX=9606 PE=1 SV=1;tr|A0A804HK74|A0A804HK74_HUMAN Gamma-tubulin complex component OS=Homo sapiens OX=9606 GN=TUBGCP2 PE=1 SV=1;tr|F2Z2B9|F2Z2B9_HUMAN Gamma-tubulin complex component OS=H	13	1	1	1	2	57.183	495	-2	0	1	0	1	0	1	0	2	19122000	0	19122000	531180	0	531180
P15924;Q4LE79;B4E2A0;B4DKX6;B4DWT7	P15924;Q4LE79	Desmoplakin;DSP variant protein (Fragment)	DSP	sp|P15924|DESP_HUMAN Desmoplakin OS=Homo sapiens OX=9606 GN=DSP PE=1 SV=3;tr|Q4LE79|Q4LE79_HUMAN DSP variant protein (Fragment) OS=Homo sapiens OX=9606 GN=DSP variant protein PE=2 SV=1	5	17	17	17	5.3	331.77	2871	107.39	0	17	0	17	0	17	0	5.3	140720000	0	140720000	502960	0	502960
V9GY61;K7EJW7;K7EIF2;H7C0Y7;C9JBG0;Q96PJ7;Q6NXT3;A0A024QZ68;E7ES60;B4DNC0;Q9BZG1	V9GY61;K7EJW7;K7EIF2;H7C0Y7;C9JBG0;Q96PJ7;Q6NXT3;A0A024QZ68;E7ES60;B4DNC0;Q9BZG1	Ras-related protein Rab-34, isoform NARR (Fragment);	RAB34;	tr|V9GY61|V9GY61_HUMAN Ras-related protein Rab-34, isoform NARR (Fragment) OS=Homo sapiens OX=9606 GN=RAB34 PE=1 SV=8;tr|K7EJW7|K7EJW7_HUMAN Ras-related protein Rab-34, isoform NARR (Fragment) OS=Homo sapiens OX=9606 GN=RAB34 PE=1 SV=1;tr|K7EIF2|K7EIF2_HUM	11	1	1	1	18.8	5.4753	48	6.3154	0	1	0	1	0	1	0	18.8	2009600	0	2009600	502390	0	502390
A0A087X0X3;P52272;M0R2I7;Q6P2D7;M0QZM1;Q7KYM9;Q59ES8;M0R0Y6;M0QYQ7;M0R0N3;M0R019;M0R2T0;B4DEG4	A0A087X0X3;P52272;M0R2I7;Q6P2D7;M0QZM1;Q7KYM9;Q59ES8	Heterogeneous nuclear ribonucleoprotein M;	HNRNPM;	tr|A0A087X0X3|A0A087X0X3_HUMAN Heterogeneous nuclear ribonucleoprotein M OS=Homo sapiens OX=9606 GN=HNRNPM PE=1 SV=1;sp|P52272|HNRPM_HUMAN Heterogeneous nuclear ribonucleoprotein M OS=Homo sapiens OX=9606 GN=HNRNPM PE=1 SV=3;tr|M0R2I7|M0R2I7_HUMAN Heteroge	13	3	3	3	4.8	77.569	730	19.214	0	3	0	3	0	3	0	4.8	27400000	0	27400000	498180	0	498180
A0A0D9SFY5;A0A0D9SFE5;Q6DC98;E9PBF6;P20700	A0A0D9SFY5;A0A0D9SFE5;Q6DC98;E9PBF6;P20700	Lamin-B1 (Fragment);Lamin B1, isoform CRA_a;LMNB1 protein (Fragment)	LMNB1;	tr|A0A0D9SFY5|A0A0D9SFY5_HUMAN Lamin-B1 (Fragment) OS=Homo sapiens OX=9606 GN=LMNB1 PE=1 SV=1;tr|A0A0D9SFE5|A0A0D9SFE5_HUMAN Lamin B1, isoform CRA_a OS=Homo sapiens OX=9606 GN=LMNB1 PE=1 SV=1;tr|Q6DC98|Q6DC98_HUMAN LMNB1 protein (Fragment) OS=Homo sapiens	5	1	1	1	7.2	18.459	166	6.1736	0	1	0	1	0	1	0	7.2	6411700	0	6411700	493210	0	493210
A8K964;Q9H307;G3V5F0;G3V579;B4E392;B4DTD4	A8K964;Q9H307	Pinin	;PNN	tr|A8K964|A8K964_HUMAN Pinin OS=Homo sapiens OX=9606 PE=2 SV=1;sp|Q9H307|PININ_HUMAN Pinin OS=Homo sapiens OX=9606 GN=PNN PE=1 SV=5	6	4	4	4	6.8	81.541	717	24.729	0	4	0	4	0	4	0	6.8	34874000	0	34874000	488350	0	488350
Q7Z406;B3KWH4;M0QY43	Q7Z406	Myosin-14	MYH14	sp|Q7Z406|MYH14_HUMAN Myosin-14 OS=Homo sapiens OX=9606 GN=MYH14 PE=1 SV=2	3	5	1	1	2.1	227.87	1995	6.4217	1	5	0	1	0	1	0.6	2.1	60360000	0	60360000	475280	0	475280
B4E190;C9J1Z8;B4DEB9;A4D0Z3;A0A024R3Q0;A0A024R0Y6;F5H423;B4DLJ3;P84085;P84077;P61204	B4E190;C9J1Z8;B4DEB9;A4D0Z3;A0A024R3Q0;A0A024R0Y6;F5H423;B4DLJ3;P84085;P84077;P61204	cDNA FLJ57770, moderately similar to ADP-ribosylation factor 3;ADP-ribosylation factor 5 (Fragment);	;ARF5	tr|B4E190|B4E190_HUMAN cDNA FLJ57770, moderately similar to ADP-ribosylation factor 3 OS=Homo sapiens OX=9606 PE=2 SV=1;tr|C9J1Z8|C9J1Z8_HUMAN ADP-ribosylation factor 5 (Fragment) OS=Homo sapiens OX=9606 GN=ARF5 PE=1 SV=1;tr|B4DEB9|B4DEB9_HUMAN ADP-ribosyl	11	1	1	1	6.9	16.159	144	6.1039	0	1	0	1	0	1	0	6.9	4275400	0	4275400	475050	0	475050
P16402;Q4VB24;B2R984;A3R0T8;A3R0T7;P10412;Q02539;A1L407;P22492	P16402;Q4VB24;B2R984;A3R0T8;A3R0T7;P10412	Histone H1.3;Histone cluster 1, H1e;	H1-3;HIST1H1E;	sp|P16402|H13_HUMAN Histone H1.3 OS=Homo sapiens OX=9606 GN=H1-3 PE=1 SV=2;tr|Q4VB24|Q4VB24_HUMAN Histone cluster 1, H1e OS=Homo sapiens OX=9606 GN=HIST1H1E PE=2 SV=1;tr|B2R984|B2R984_HUMAN cDNA, FLJ94268, highly similar to Homo sapiens histone 1, H1e (HIS	9	9	1	1	29.9	22.35	221	6.466	6	9	0	1	0	1	17.2	29.9	5608500	0	5608500	467370	0	467370
E7EU85;B4DGH9;E9PFF5;B4DM21;B4DM78;A0A0F7L0Q8;B4DXZ6;A0A0F7L1S3;A0A0F7KYT8;P51114;C9JZE0;C9JY20	E7EU85;B4DGH9;E9PFF5;B4DM21;B4DM78;A0A0F7L0Q8;B4DXZ6;A0A0F7L1S3;A0A0F7KYT8;P51114;C9JZE0;C9JY20	RNA-binding protein FXR1;cDNA FLJ58772, highly similar to Fragile X mental retardation syndrome-related protein 1;	FXR1;	tr|E7EU85|E7EU85_HUMAN RNA-binding protein FXR1 OS=Homo sapiens OX=9606 GN=FXR1 PE=1 SV=1;tr|B4DGH9|B4DGH9_HUMAN cDNA FLJ58772, highly similar to Fragile X mental retardation syndrome-related protein 1 OS=Homo sapiens OX=9606 PE=2 SV=1;tr|E9PFF5|E9PFF5_HUM	12	2	2	2	6.4	50.99	454	12.009	0	2	0	2	0	2	0	6.4	11711000	0	11711000	450410	0	450410
A0A0S2Z5K3;Q3LIB4;A0A0S2Z5R3;Q9NPI6;A0A087WT55;A0A0S2Z5I2;A0A087WVE6	A0A0S2Z5K3;Q3LIB4;A0A0S2Z5R3;Q9NPI6;A0A087WT55;A0A0S2Z5I2	5-(N(7)-methylguanosine 5-triphospho)-[mRNA] hydrolase (Fragment);5-(N(7)-methylguanosine 5-triphospho)-[mRNA] hydrolase	DCP1A;	tr|A0A0S2Z5K3|A0A0S2Z5K3_HUMAN 5-(N(7)-methylguanosine 5-triphospho)-[mRNA] hydrolase (Fragment) OS=Homo sapiens OX=9606 GN=DCP1A PE=2 SV=1;tr|Q3LIB4|Q3LIB4_HUMAN 5-(N(7)-methylguanosine 5-triphospho)-[mRNA] hydrolase OS=Homo sapiens OX=9606 GN=Nbla003	7	3	3	3	6.8	59.488	546	23.198	0	3	0	3	0	3	0	6.8	27033000	0	27033000	444000	0	444000
P27482	P27482	Calmodulin-like protein 3	CALML3	sp|P27482|CALL3_HUMAN Calmodulin-like protein 3 OS=Homo sapiens OX=9606 GN=CALML3 PE=1 SV=2	1	1	1	1	7.4	16.891	149	6.5873	0	1	0	1	0	1	0	7.4	4820600	0	4820600	438240	0	438240
Q15717;M0QZR9	Q15717;M0QZR9	ELAV-like protein 1	ELAVL1	sp|Q15717|ELAV1_HUMAN ELAV-like protein 1 OS=Homo sapiens OX=9606 GN=ELAVL1 PE=1 SV=2;tr|M0QZR9|M0QZR9_HUMAN ELAV-like protein 1 OS=Homo sapiens OX=9606 GN=ELAVL1 PE=1 SV=1	2	2	2	2	7.4	36.091	326	13.753	0	2	0	2	0	2	0	7.4	7743500	0	7743500	430200	0	430200
P63261;I3L4N8;B4DVQ0;B4E3A4;A0A804GS07;I3L3I0;I3L1U9;I3L3R2;K7EM38;J3KT65;A1E282;A0A7P0TBL1	P63261;I3L4N8;B4DVQ0;B4E3A4;A0A804GS07;I3L3I0;I3L1U9	Actin, cytoplasmic 2;cDNA FLJ58286, highly similar to Actin, cytoplasmic 2	ACTG1;	sp|P63261|ACTG_HUMAN Actin, cytoplasmic 2 OS=Homo sapiens OX=9606 GN=ACTG1 PE=1 SV=1;tr|I3L4N8|I3L4N8_HUMAN Actin, cytoplasmic 2 OS=Homo sapiens OX=9606 GN=ACTG1 PE=1 SV=9;tr|B4DVQ0|B4DVQ0_HUMAN cDNA FLJ58286, highly similar to Actin, cytoplasmic 2 OS=Homo	12	19	1	1	68	41.792	375	7.3844	9	18	0	1	0	1	31.5	60.3	9805200	0	9805200	426310	0	426310
Q14331;E9PRR7	Q14331;E9PRR7	Protein FRG1;Protein FRG1 (Fragment)	FRG1	sp|Q14331|FRG1_HUMAN Protein FRG1 OS=Homo sapiens OX=9606 GN=FRG1 PE=1 SV=1;tr|E9PRR7|E9PRR7_HUMAN Protein FRG1 (Fragment) OS=Homo sapiens OX=9606 GN=FRG1 PE=1 SV=1	2	2	2	2	9.7	29.172	258	11.682	0	2	0	2	0	2	0	9.7	10803000	0	10803000	425750	0	425750
H0Y4Y4;A0A024QZ77;Q96C19	H0Y4Y4;A0A024QZ77;Q96C19	EF-hand domain-containing protein D2 (Fragment);EF-hand domain family, member D2, isoform CRA_a;	EFHD2;	tr|H0Y4Y4|H0Y4Y4_HUMAN EF-hand domain-containing protein D2 (Fragment) OS=Homo sapiens OX=9606 GN=EFHD2 PE=1 SV=1;tr|A0A024QZ77|A0A024QZ77_HUMAN EF-hand domain family, member D2, isoform CRA_a OS=Homo sapiens OX=9606 GN=EFHD2 PE=2 SV=1;sp|Q96C19|EFHD2_HUMA	3	1	1	1	6.7	19.474	179	6.2538	0	1	0	1	0	1	0	6.7	5525200	0	5525200	425020	0	425020
Q53T09;P13010	Q53T09;P13010	Uncharacterized protein XRCC5 (Fragment);X-ray repair cross-complementing protein 5	XRCC5	tr|Q53T09|Q53T09_HUMAN Uncharacterized protein XRCC5 (Fragment) OS=Homo sapiens OX=9606 GN=XRCC5 PE=3 SV=1;sp|P13010|XRCC5_HUMAN X-ray repair cross-complementing protein 5 OS=Homo sapiens OX=9606 GN=XRCC5 PE=1 SV=3	2	2	2	2	3	64.243	568	12.045	0	2	0	2	0	2	0	3	15080000	0	15080000	418880	0	418880
B4DZZ3;A2ABK4;A0A0G2JI50;E9PD43;A0A0A0MT02;A0A0A0MSN9;B7Z6T4;A0A1U9X839;H9ZYJ1;A0A1U9X830;P18615	B4DZZ3;A2ABK4;A0A0G2JI50;E9PD43;A0A0A0MT02;A0A0A0MSN9;B7Z6T4;A0A1U9X839;H9ZYJ1;A0A1U9X830;P18615	cDNA FLJ61007, highly similar to Negative elongation factor E;Negative elongation factor E (Fragment);	;NELFE	tr|B4DZZ3|B4DZZ3_HUMAN cDNA FLJ61007, highly similar to Negative elongation factor E OS=Homo sapiens OX=9606 PE=2 SV=1;tr|A2ABK4|A2ABK4_HUMAN Negative elongation factor E (Fragment) OS=Homo sapiens OX=9606 GN=NELFE PE=1 SV=1;tr|A0A0G2JI50|A0A0G2JI50_HUMAN	11	1	1	1	8.8	16.473	148	6.3689	0	1	0	1	0	1	0	8.8	3348900	0	3348900	418610	0	418610
A0A0D9SEM9	A0A0D9SEM9	ATP-dependent RNA helicase DDX39A (Fragment)	DDX39A	tr|A0A0D9SEM9|A0A0D9SEM9_HUMAN ATP-dependent RNA helicase DDX39A (Fragment) OS=Homo sapiens OX=9606 GN=DDX39A PE=1 SV=1	1	1	1	1	10.4	10.925	96	-2	0	1	0	1	0	1	0	10.4	3695600	0	3695600	410620	0	410620
A0A140VK00;P25311	A0A140VK00;P25311	Testicular tissue protein Li 227;Zinc-alpha-2-glycoprotein	;AZGP1	tr|A0A140VK00|A0A140VK00_HUMAN Testicular tissue protein Li 227 OS=Homo sapiens OX=9606 PE=2 SV=1;sp|P25311|ZA2G_HUMAN Zinc-alpha-2-glycoprotein OS=Homo sapiens OX=9606 GN=AZGP1 PE=1 SV=2	2	1	1	1	3.4	34.258	298	6.3759	0	1	0	1	0	1	0	3.4	7650900	0	7650900	402680	0	402680
A0A140VK53;Q9UQ35;I3L4D8;O60382;I3L0N7;Q05CV9;A0AUK8;I3L182;Q9UQ39;Q05BI2;I3L1I8	A0A140VK53;Q9UQ35;I3L4D8	Testicular secretory protein Li 53;Serine/arginine repetitive matrix protein 2;	;SRRM2	tr|A0A140VK53|A0A140VK53_HUMAN Testicular secretory protein Li 53 OS=Homo sapiens OX=9606 PE=2 SV=1;sp|Q9UQ35|SRRM2_HUMAN Serine/arginine repetitive matrix protein 2 OS=Homo sapiens OX=9606 GN=SRRM2 PE=1 SV=2;tr|I3L4D8|I3L4D8_HUMAN Serine/arginine repetiti	11	10	10	10	4.6	299.61	2752	63.909	2	9	2	9	2	9	0.8	4.2	96925000	13064000	83862000	450310	48991	401310	8.1915
E9PDF6;B0I1S9;O43795;E7EQD9;Q05CR5;C9JUP5;C9JYW1;B3KQI2;Q13871;C9K0I9;Q14777;H7C2Y7;B2R643;Q9UBC5	E9PDF6;B0I1S9;O43795;E7EQD9;Q05CR5	Unconventional myosin-Ib;MYO1B variant protein	MYO1B;	tr|E9PDF6|E9PDF6_HUMAN Unconventional myosin-Ib OS=Homo sapiens OX=9606 GN=MYO1B PE=1 SV=1;tr|B0I1S9|B0I1S9_HUMAN MYO1B variant protein OS=Homo sapiens OX=9606 GN=MYO1B PE=2 SV=1;sp|O43795|MYO1B_HUMAN Unconventional myosin-Ib OS=Homo sapiens OX=9606 GN=MYO	14	6	6	6	7.6	128.48	1107	37.186	0	6	0	6	0	6	0	7.6	43150000	0	43150000	392920	0	392920
E4W6B6;B2R4D8;A0A024R1V4;K7ELC7;P61353	E4W6B6;B2R4D8;A0A024R1V4;K7ELC7;P61353	60S ribosomal protein L27 (Fragment);60S ribosomal protein L27	RPL27;	tr|E4W6B6|E4W6B6_HUMAN 60S ribosomal protein L27 (Fragment) OS=Homo sapiens OX=9606 GN=RPL27 PE=2 SV=1;tr|B2R4D8|B2R4D8_HUMAN 60S ribosomal protein L27 OS=Homo sapiens OX=9606 PE=2 SV=1;tr|A0A024R1V4|A0A024R1V4_HUMAN 60S ribosomal protein L27 OS=Homo sapie	5	1	1	1	8.7	14.257	126	6.0938	0	1	0	1	0	1	0	8.7	8530300	0	8530300	388960	0	388960
B4E356;B4DE32;B1AHC9;A0A024R1N4;P12956;Q6IC76;B2RDN9	B4E356;B4DE32;B1AHC9;A0A024R1N4;P12956;Q6IC76;B2RDN9	cDNA FLJ54993, highly similar to ATP-dependent DNA helicase 2 subunit 1;cDNA FLJ53970, highly similar to ATP-dependent DNA helicase 2 subunit 1 (EC3.6.1.-)		tr|B4E356|B4E356_HUMAN cDNA FLJ54993, highly similar to ATP-dependent DNA helicase 2 subunit 1 OS=Homo sapiens OX=9606 PE=2 SV=1;tr|B4DE32|B4DE32_HUMAN cDNA FLJ53970, highly similar to ATP-dependent DNA helicase 2 subunit 1 (EC3.6.1.-) OS=Homo sapiens OX=9	7	2	2	2	5.3	54.451	476	13.633	0	2	0	2	0	2	0	5.3	11578000	0	11578000	385920	0	385920
B4DRX8;B4DHA6;Q6IB29;H7C2Q8;Q99848	B4DRX8;B4DHA6;Q6IB29;H7C2Q8;Q99848	cDNA FLJ51285, highly similar to Probable rRNA-processing protein EBP2;cDNA FLJ60526, highly similar to Probable rRNA-processing protein EBP2;		tr|B4DRX8|B4DRX8_HUMAN cDNA FLJ51285, highly similar to Probable rRNA-processing protein EBP2 OS=Homo sapiens OX=9606 PE=2 SV=1;tr|B4DHA6|B4DHA6_HUMAN cDNA FLJ60526, highly similar to Probable rRNA-processing protein EBP2 OS=Homo sapiens OX=9606 PE=2 SV=1;	5	1	1	1	12.5	12.875	120	6.5154	0	1	0	1	0	1	0	12.5	3055300	0	3055300	381910	0	381910
Q14151;K7EII0;A0PJ47;B7Z959;B7Z1C7;B7Z2F6;B7Z2Z1;B7Z5X3;B7ZLP5;A8K329;Q15424	Q14151;K7EII0;A0PJ47;B7Z959;B7Z1C7;B7Z2F6;B7Z2Z1;B7Z5X3;B7ZLP5;A8K329;Q15424	Scaffold attachment factor B2;Scaffold attachment factor B1 (Fragment);SAFB2 protein (Fragment)	SAFB2;SAFB;	sp|Q14151|SAFB2_HUMAN Scaffold attachment factor B2 OS=Homo sapiens OX=9606 GN=SAFB2 PE=1 SV=1;tr|K7EII0|K7EII0_HUMAN Scaffold attachment factor B1 (Fragment) OS=Homo sapiens OX=9606 GN=SAFB PE=1 SV=1;tr|A0PJ47|A0PJ47_HUMAN SAFB2 protein (Fragment) OS=Homo	11	2	2	2	1.9	107.47	953	12.314	0	2	0	2	0	2	0	1.9	18865000	0	18865000	369900	0	369900
B4DNK4;H3BTN5;P14618;A0A804F729;A0A804F6T5;A0A024R5Z9;V9HWB8;A0A024R609;B4DRT3;Q16715;Q16716;B4DPM0;A0A4D6DDG8;H3BU13;Q504U3;Q8WUW7;H3BQ34;H3BTJ2;H3BUW1;H3BT25;P30613	B4DNK4;H3BTN5;P14618;A0A804F729;A0A804F6T5;A0A024R5Z9;V9HWB8;A0A024R609;B4DRT3;Q16715;Q16716;B4DPM0;A0A4D6DDG8;H3BU13;Q504U3;Q8WUW7;H3BQ34;H3BTJ2;H3BUW1;H3BT25;P30613	Pyruvate kinase;Pyruvate kinase (Fragment);Pyruvate kinase PKM;	PKM;	tr|B4DNK4|B4DNK4_HUMAN Pyruvate kinase OS=Homo sapiens OX=9606 GN=PKM PE=1 SV=1;tr|H3BTN5|H3BTN5_HUMAN Pyruvate kinase (Fragment) OS=Homo sapiens OX=9606 GN=PKM PE=1 SV=1;sp|P14618|KPYM_HUMAN Pyruvate kinase PKM OS=Homo sapiens OX=9606 GN=PKM PE=1 SV=4;tr|	21	2	2	2	5.3	49.897	457	12.445	0	2	0	2	0	2	0	5.3	11133000	0	11133000	347920	0	347920
Q5D862	Q5D862	Filaggrin-2	FLG2	sp|Q5D862|FILA2_HUMAN Filaggrin-2 OS=Homo sapiens OX=9606 GN=FLG2 PE=1 SV=1	1	1	1	1	0.5	248.07	2391	7.1363	0	1	0	1	0	1	0	0.5	25663000	0	25663000	333280	0	333280
P42166;A0A024RBH7;G5E972;A0A024RBE7;P42167;H0YJH7;Q59G12	P42166;A0A024RBH7;G5E972;A0A024RBE7;P42167	Lamina-associated polypeptide 2, isoform alpha;Thymopoietin, isoform CRA_a;	TMPO;	sp|P42166|LAP2A_HUMAN Lamina-associated polypeptide 2, isoform alpha OS=Homo sapiens OX=9606 GN=TMPO PE=1 SV=2;tr|A0A024RBH7|A0A024RBH7_HUMAN Thymopoietin, isoform CRA_a OS=Homo sapiens OX=9606 GN=TMPO PE=3 SV=1;tr|G5E972|G5E972_HUMAN Lamina-associated pol	7	3	3	3	5.2	75.491	694	19.229	0	3	0	3	0	3	0	5.2	12663000	0	12663000	324690	0	324690
Q5T749	Q5T749	Keratinocyte proline-rich protein	KPRP	sp|Q5T749|KPRP_HUMAN Keratinocyte proline-rich protein OS=Homo sapiens OX=9606 GN=KPRP PE=1 SV=1	1	1	1	1	3.1	64.135	579	7.3749	0	1	0	1	0	1	0	3.1	14783000	0	14783000	324370	0	324370
Q86YA8;F8VU51;P49750	Q86YA8;F8VU51;P49750	YLPM1 protein (Fragment);YLP motif-containing protein 1	YLPM1;	tr|Q86YA8|Q86YA8_HUMAN YLPM1 protein (Fragment) OS=Homo sapiens OX=9606 GN=YLPM1 PE=2 SV=1;tr|F8VU51|F8VU51_HUMAN YLP motif-containing protein 1 OS=Homo sapiens OX=9606 GN=YLPM1 PE=1 SV=1;sp|P49750|YLPM1_HUMAN YLP motif-containing protein 1 OS=Homo sapiens	3	1	1	1	2.5	56.756	520	7.4584	0	1	0	1	0	1	0	2.5	5183000	0	5183000	304880	0	304880
B3KRI0;Q9UJL9	B3KRI0;Q9UJL9	cDNA FLJ34293 fis, clone FEBRA2004651, highly similar to Zinc finger protein 643;Zinc finger protein 69 homolog B	;ZFP69B	tr|B3KRI0|B3KRI0_HUMAN cDNA FLJ34293 fis, clone FEBRA2004651, highly similar to Zinc finger protein 643 OS=Homo sapiens OX=9606 PE=2 SV=1;sp|Q9UJL9|ZF69B_HUMAN Zinc finger protein 69 homolog B OS=Homo sapiens OX=9606 GN=ZFP69B PE=1 SV=2	2	1	1	1	3.2	54.458	465	-2	0	1	0	1	0	1	0	3.2	10491000	0	10491000	291410	0	291410
O00571;B4DLU5;A0A2R8Y645;Q59GX6;A0A2R8Y4A4;B5BTY4;A0A2U3TZJ9;A0A2R8YFS5;A0A024R9A4;A0A2R8YFR4;A0A2R8YCW1;A0A0D9SG12;A0A2R8YF78;A0A0D9SFB3;A0A2R8Y5G6;A0A0D9SF53;O15523;A0A2R8YDH3;F6S8Q4;A0A2R8Y7T2;A0A2R8YDT5;B4E010;Q5S4N1;B4E132;A0A087WVZ1;B4E3C4;C9J081;C9J8G5;A0A0J9YVQ7;A0A2R8Y650;A0A2R8YCU0	O00571;B4DLU5;A0A2R8Y645;Q59GX6;A0A2R8Y4A4;B5BTY4;A0A2U3TZJ9;A0A2R8YFS5;A0A024R9A4;A0A2R8YFR4;A0A2R8YCW1;A0A0D9SG12;A0A2R8YF78;A0A0D9SFB3;A0A2R8Y5G6;A0A0D9SF53;O15523;A0A2R8YDH3;F6S8Q4;A0A2R8Y7T2;A0A2R8YDT5;B4E010;Q5S4N1	ATP-dependent RNA helicase DDX3X;RNA helicase;	DDX3X;	sp|O00571|DDX3X_HUMAN ATP-dependent RNA helicase DDX3X OS=Homo sapiens OX=9606 GN=DDX3X PE=1 SV=3;tr|B4DLU5|B4DLU5_HUMAN RNA helicase OS=Homo sapiens OX=9606 PE=2 SV=1;tr|A0A2R8Y645|A0A2R8Y645_HUMAN RNA helicase OS=Homo sapiens OX=9606 GN=DDX3X PE=1 SV=1;t	31	5	4	4	10.1	73.243	662	25.924	0	5	0	4	0	4	0	10.1	17972000	0	17972000	284660	0	284660
Q8TBA7;K9JA46;P07900;Q86U12;O75322;Q2VPJ6;Q96HX7	Q8TBA7;K9JA46;P07900;Q86U12;O75322;Q2VPJ6;Q96HX7	HSP90AA1 protein (Fragment);Epididymis luminal secretory protein 52;	HSP90AA1;EL52;	tr|Q8TBA7|Q8TBA7_HUMAN HSP90AA1 protein (Fragment) OS=Homo sapiens OX=9606 GN=HSP90AA1 PE=2 SV=2;tr|K9JA46|K9JA46_HUMAN Epididymis luminal secretory protein 52 OS=Homo sapiens OX=9606 GN=EL52 PE=2 SV=1;sp|P07900|HS90A_HUMAN Heat shock protein HSP 90-alpha	7	5	2	2	10.2	73.826	638	17.211	0	5	0	2	0	2	0	10.2	15074000	0	15074000	283870	0	283870
Q9BU76	Q9BU76	Multiple myeloma tumor-associated protein 2	MMTAG2	sp|Q9BU76|MMTA2_HUMAN Multiple myeloma tumor-associated protein 2 OS=Homo sapiens OX=9606 GN=MMTAG2 PE=1 SV=1	1	2	2	2	8.7	29.411	263	11.922	0	2	0	2	0	2	0	8.7	4710200	0	4710200	277070	0	277070
A0PJD3;A0A024R689;A0A1C7CYX1;Q6PJG2;H7C1L3	A0PJD3;A0A024R689;A0A1C7CYX1;Q6PJG2;H7C1L3	C14orf43 protein (Fragment);Chromosome 14 open reading frame 43, isoform CRA_a;	C14orf43;	tr|A0PJD3|A0PJD3_HUMAN C14orf43 protein (Fragment) OS=Homo sapiens OX=9606 GN=C14orf43 PE=2 SV=1;tr|A0A024R689|A0A024R689_HUMAN Chromosome 14 open reading frame 43, isoform CRA_a OS=Homo sapiens OX=9606 GN=C14orf43 PE=4 SV=1;tr|A0A1C7CYX1|A0A1C7CYX1_HUMAN	5	2	2	2	2.5	112.69	1025	12.914	0	2	0	2	0	2	0	2.5	13782000	0	13782000	265040	0	265040
B4DIF8;D6W5C0;K9MS24;B2ZZ89;A0A087WUZ3;Q01082	B4DIF8;D6W5C0;K9MS24;B2ZZ89;A0A087WUZ3;Q01082	Spectrin, beta, non-erythrocytic 1, isoform CRA_c;Spectrin beta chain	SPTBN1;	tr|B4DIF8|B4DIF8_HUMAN Spectrin, beta, non-erythrocytic 1, isoform CRA_c OS=Homo sapiens OX=9606 GN=SPTBN1 PE=2 SV=1;tr|D6W5C0|D6W5C0_HUMAN Spectrin beta chain OS=Homo sapiens OX=9606 GN=SPTBN1 PE=3 SV=1;tr|K9MS24|K9MS24_HUMAN Spectrin beta chain OS=Homo s	6	1	1	1	2.8	39.717	354	6.0926	0	1	0	1	0	1	0	2.8	6173100	0	6173100	257210	0	257210
Q58F26;Q6PJK6;Q08211	Q58F26;Q6PJK6;Q08211	RNA helicase (Fragment);ATP-dependent RNA helicase A	DHX9;	tr|Q58F26|Q58F26_HUMAN RNA helicase (Fragment) OS=Homo sapiens OX=9606 GN=DHX9 PE=2 SV=1;tr|Q6PJK6|Q6PJK6_HUMAN RNA helicase (Fragment) OS=Homo sapiens OX=9606 GN=DHX9 PE=2 SV=1;sp|Q08211|DHX9_HUMAN ATP-dependent RNA helicase A OS=Homo sapiens OX=9606 GN=D	3	2	2	2	4	67.105	596	12.139	0	2	0	2	0	2	0	4	8449400	0	8449400	256040	0	256040
B4DRX3;Q8TBK5;Q8N5Z7;B2R4K7;A0A024RBK3;Q9HBB3;Q02878	B4DRX3;Q8TBK5;Q8N5Z7;B2R4K7;A0A024RBK3;Q9HBB3;Q02878	60S ribosomal protein L6	;RPL6	tr|B4DRX3|B4DRX3_HUMAN 60S ribosomal protein L6 OS=Homo sapiens OX=9606 PE=2 SV=1;tr|Q8TBK5|Q8TBK5_HUMAN 60S ribosomal protein L6 OS=Homo sapiens OX=9606 GN=RPL6 PE=1 SV=1;tr|Q8N5Z7|Q8N5Z7_HUMAN 60S ribosomal protein L6 OS=Homo sapiens OX=9606 GN=RPL6 PE=1	7	1	1	1	5.7	26.073	227	6.2203	0	1	0	1	0	1	0	5.7	8287100	0	8287100	250130	0	250130
H3BPT7;H3BTT0;B3KPI7;B4DIT3;Q8N554	H3BPT7;H3BTT0;B3KPI7;B4DIT3;Q8N554	Zinc finger protein 276;	ZNF276;	tr|H3BPT7|H3BPT7_HUMAN Zinc finger protein 276 OS=Homo sapiens OX=9606 GN=ZNF276 PE=1 SV=1;tr|H3BTT0|H3BTT0_HUMAN Zinc finger protein 276 OS=Homo sapiens OX=9606 GN=ZNF276 PE=1 SV=1;tr|B3KPI7|B3KPI7_HUMAN cDNA FLJ31843 fis, clone NT2RP7000271, highly simil	5	1	1	1	3.9	30.155	280	5.978	0	1	0	1	0	1	0	3.9	3141800	0	3141800	241670	0	241670
Q9HCS7;Q68CN2;Q71SV8	Q9HCS7;Q68CN2;Q71SV8	Pre-mRNA-splicing factor SYF1;Uncharacterized protein DKFZp762C1015 (Fragment);	XAB2;DKFZp762C1015;	sp|Q9HCS7|SYF1_HUMAN Pre-mRNA-splicing factor SYF1 OS=Homo sapiens OX=9606 GN=XAB2 PE=1 SV=2;tr|Q68CN2|Q68CN2_HUMAN Uncharacterized protein DKFZp762C1015 (Fragment) OS=Homo sapiens OX=9606 GN=DKFZp762C1015 PE=2 SV=1;tr|Q71SV8|Q71SV8_HUMAN Crn-related prote	3	2	2	2	2.9	100.01	855	12.704	0	2	0	2	0	2	0	2.9	12972000	0	12972000	235850	0	235850
A0A0A6YYC7;A0A024R4Z4;A0A024R4Z1;Q96JP5	A0A0A6YYC7;A0A024R4Z4;A0A024R4Z1;Q96JP5	HCG2042749, isoform CRA_d;HCG2039447, isoform CRA_d;	ZFP91-CNTF;hCG_2039447;	tr|A0A0A6YYC7|A0A0A6YYC7_HUMAN HCG2042749, isoform CRA_d OS=Homo sapiens OX=9606 GN=ZFP91-CNTF PE=4 SV=1;tr|A0A024R4Z4|A0A024R4Z4_HUMAN HCG2039447, isoform CRA_d OS=Homo sapiens OX=9606 GN=hCG_2039447 PE=1 SV=1;tr|A0A024R4Z1|A0A024R4Z1_HUMAN HCG2042749, is	4	1	1	1	2.3	59.57	529	6.3383	0	1	0	1	0	1	0	2.3	6577500	0	6577500	226810	0	226810
Q01804;D6RI06	Q01804;D6RI06	OTU domain-containing protein 4;Ubiquitinyl hydrolase 1 (Fragment)	OTUD4	sp|Q01804|OTUD4_HUMAN OTU domain-containing protein 4 OS=Homo sapiens OX=9606 GN=OTUD4 PE=1 SV=4;tr|D6RI06|D6RI06_HUMAN Ubiquitinyl hydrolase 1 (Fragment) OS=Homo sapiens OX=9606 GN=OTUD4 PE=1 SV=1	2	2	2	2	1.8	124.04	1114	11.808	0	2	0	2	0	2	0	1.8	12868000	0	12868000	221860	0	221860
A0A5K1VW66;A0A024R1D9;A0A024R1I0;A0A024R1F6;A0A024R1J9;A0A024R1J8;B7Z4B6;P35240	A0A5K1VW66;A0A024R1D9;A0A024R1I0;A0A024R1F6;A0A024R1J9;A0A024R1J8;B7Z4B6;P35240	Merlin (Fragment);Neurofibromin 2 (Bilateral acoustic neuroma), isoform CRA_d;	NF2;	tr|A0A5K1VW66|A0A5K1VW66_HUMAN Merlin (Fragment) OS=Homo sapiens OX=9606 GN=NF2 PE=1 SV=1;tr|A0A024R1D9|A0A024R1D9_HUMAN Neurofibromin 2 (Bilateral acoustic neuroma), isoform CRA_d OS=Homo sapiens OX=9606 GN=NF2 PE=4 SV=1;tr|A0A024R1I0|A0A024R1I0_HUMAN Neu	8	1	1	1	2.5	47.145	401	6.1639	0	1	0	1	0	1	0	2.5	5299700	0	5299700	220820	0	220820
Q9H0H5;A0A2X0U4T9;A0A024R136;B2RE34;F8VWY4;Q9BZ74;F8VRD2;Q9H9L9;F8VVE5;F8VVY0;F8VXH1;F8VZ66;F8W0L1;F8VWX0;F8VS54;F8VV39;F8VUW9;F8VV47	Q9H0H5;A0A2X0U4T9;A0A024R136;B2RE34;F8VWY4;Q9BZ74;F8VRD2;Q9H9L9;F8VVE5;F8VVY0;F8VXH1;F8VZ66;F8W0L1;F8VWX0;F8VS54;F8VV39;F8VUW9;F8VV47	Rac GTPase-activating protein 1;RACGAP1 (Fragment);	RACGAP1;	sp|Q9H0H5|RGAP1_HUMAN Rac GTPase-activating protein 1 OS=Homo sapiens OX=9606 GN=RACGAP1 PE=1 SV=1;tr|A0A2X0U4T9|A0A2X0U4T9_HUMAN RACGAP1 (Fragment) OS=Homo sapiens OX=9606 GN=RACGAP1 PE=4 SV=1;tr|A0A024R136|A0A024R136_HUMAN Rac GTPase activating protein 1	18	2	2	2	2.8	71.026	632	13.513	0	2	0	2	0	2	0	2.8	8103300	0	8103300	219010	0	219010
A0A8I5KSD5;A0A8I5KUE3;A0A8I5KYZ1;E9PMV1;Q15149;H0YDN1;D3DWL0;Q96IE3	A0A8I5KSD5;A0A8I5KUE3;A0A8I5KYZ1;E9PMV1;Q15149;H0YDN1	Plectin;	PLEC;	tr|A0A8I5KSD5|A0A8I5KSD5_HUMAN Plectin OS=Homo sapiens OX=9606 GN=PLEC PE=1 SV=1;tr|A0A8I5KUE3|A0A8I5KUE3_HUMAN Plectin OS=Homo sapiens OX=9606 GN=PLEC PE=1 SV=1;tr|A0A8I5KYZ1|A0A8I5KYZ1_HUMAN Plectin OS=Homo sapiens OX=9606 GN=PLEC PE=1 SV=1;tr|E9PMV1|E9P	8	15	15	15	3.8	505.29	4453	93.164	0	15	0	15	0	15	0	3.8	89307000	0	89307000	217460	0	217460
Q9H2B4	Q9H2B4	Sulfate anion transporter 1	SLC26A1	sp|Q9H2B4|S26A1_HUMAN Sulfate anion transporter 1 OS=Homo sapiens OX=9606 GN=SLC26A1 PE=1 SV=2	1	1	1	1	1	75.015	701	5.9975	0	1	0	1	0	1	0	1	6074000	0	6074000	216930	0	216930
Q53RR5;E9PG15;P27348	Q53RR5;E9PG15;P27348	Uncharacterized protein YWHAQ (Fragment);14-3-3 protein theta (Fragment);14-3-3 protein theta	YWHAQ;	tr|Q53RR5|Q53RR5_HUMAN Uncharacterized protein YWHAQ (Fragment) OS=Homo sapiens OX=9606 GN=YWHAQ PE=3 SV=1;tr|E9PG15|E9PG15_HUMAN 14-3-3 protein theta (Fragment) OS=Homo sapiens OX=9606 GN=YWHAQ PE=1 SV=1;sp|P27348|1433T_HUMAN 14-3-3 protein theta OS=Homo	3	1	1	1	14.3	11.199	98	6.3891	0	1	0	1	0	1	0	14.3	2139700	0	2139700	213970	0	213970
B4E1T1;B4DL32;H0YI76;H0YIN9;F8VU69	B4E1T1;B4DL32	cDNA FLJ54081, highly similar to Keratin, type II cytoskeletal 5;cDNA FLJ59922, highly similar to Keratin, type II cytoskeletal 5		tr|B4E1T1|B4E1T1_HUMAN cDNA FLJ54081, highly similar to Keratin, type II cytoskeletal 5 OS=Homo sapiens OX=9606 PE=2 SV=1;tr|B4DL32|B4DL32_HUMAN cDNA FLJ59922, highly similar to Keratin, type II cytoskeletal 5 OS=Homo sapiens OX=9606 PE=2 SV=1	5	28	1	0	40.9	58.85	555	10.544	21	26	0	1	0	0	30.5	37.5	6835400	0	6835400	213600	0	213600
V9GY01;Q9Y448	V9GY01;Q9Y448	Chromosome 15 open reading frame 23, isoform CRA_d;Small kinetochore-associated protein	KNSTRN	tr|V9GY01|V9GY01_HUMAN Chromosome 15 open reading frame 23, isoform CRA_d OS=Homo sapiens OX=9606 GN=KNSTRN PE=1 SV=1;sp|Q9Y448|SKAP_HUMAN Small kinetochore-associated protein OS=Homo sapiens OX=9606 GN=KNSTRN PE=1 SV=2	2	1	1	1	5.9	26.983	238	8.2752	0	1	0	1	0	1	0	5.9	3844900	0	3844900	213600	0	213600
H7C1J2;H7C1M5;Q9H147;F2Z2A4	H7C1J2;H7C1M5;Q9H147;F2Z2A4	Deoxynucleotidyltransferase terminal-interacting protein 1 (Fragment)	DNTTIP1;	tr|H7C1J2|H7C1J2_HUMAN Deoxynucleotidyltransferase terminal-interacting protein 1 (Fragment) OS=Homo sapiens OX=9606 GN=DNTTIP1 PE=1 SV=1;tr|H7C1M5|H7C1M5_HUMAN Deoxynucleotidyltransferase terminal-interacting protein 1 (Fragment) OS=Homo sapiens OX=9606 G	4	2	2	2	9.5	26.352	232	12.519	0	2	0	2	0	2	0	9.5	11629000	0	11629000	213270	0	213270
Q6IBR8;B5BU01;P20042	Q6IBR8;B5BU01;P20042	Eukaryotic translation initiation factor 2, subunit 2 beta, 38kDa;Eukaryotic translation initiation factor 2 beta;	EIF2S2;	tr|Q6IBR8|Q6IBR8_HUMAN Eukaryotic translation initiation factor 2, subunit 2 beta, 38kDa OS=Homo sapiens OX=9606 GN=EIF2S2 PE=2 SV=1;tr|B5BU01|B5BU01_HUMAN Eukaryotic translation initiation factor 2 beta OS=Homo sapiens OX=9606 GN=EIF2S2 PE=2 SV=1;sp|P2004	3	1	1	1	4.5	38.388	333	7.2224	0	1	0	1	0	1	0	4.5	4436700	0	4436700	201670	0	201670
Q8J015;Q0VGL3;A0A7I2V2L9;Q9BSQ6;Q5QTS3;Q53H34;A0A384ME37;M0QYS1;P40429;A0A7I2V5L3;Q6NVV1	Q8J015;Q0VGL3;A0A7I2V2L9;Q9BSQ6;Q5QTS3;Q53H34;A0A384ME37;M0QYS1;P40429;A0A7I2V5L3;Q6NVV1	60S ribosomal protein L13a	RPL13A;	tr|Q8J015|Q8J015_HUMAN 60S ribosomal protein L13a OS=Homo sapiens OX=9606 GN=RPL13A PE=1 SV=1;tr|Q0VGL3|Q0VGL3_HUMAN 60S ribosomal protein L13a OS=Homo sapiens OX=9606 GN=RPL13A PE=2 SV=1;tr|A0A7I2V2L9|A0A7I2V2L9_HUMAN 60S ribosomal protein L13a OS=Homo sa	11	2	2	2	12.7	16.731	142	11.679	0	2	0	2	0	2	0	12.7	2186800	0	2186800	198800	0	198800
Q7Z759;Q53HU0;P50990	Q7Z759;Q53HU0;P50990	T-complex protein 1 subunit theta;T-complex protein 1 subunit theta (Fragment);	CCT8;	tr|Q7Z759|Q7Z759_HUMAN T-complex protein 1 subunit theta OS=Homo sapiens OX=9606 GN=CCT8 PE=2 SV=1;tr|Q53HU0|Q53HU0_HUMAN T-complex protein 1 subunit theta (Fragment) OS=Homo sapiens OX=9606 PE=2 SV=1;sp|P50990|TCPQ_HUMAN T-complex protein 1 subunit theta	3	1	1	1	2	54.106	497	6.5094	0	1	0	1	0	1	0	2	6945200	0	6945200	198430	0	198430
B7Z532;A0A7I2V5M1;A0A7I2YQK6;B7Z5E7;A0A7I2V599;A0A7I2V2X6;B7Z4F6;B7Z597;B3GQS7;A0A024R3X4;P10809	B7Z532;A0A7I2V5M1;A0A7I2YQK6;B7Z5E7;A0A7I2V599;A0A7I2V2X6;B7Z4F6;B7Z597;B3GQS7;A0A024R3X4;P10809	cDNA FLJ51028, highly similar to 60 kDa heat shock protein, mitochondrial;60 kDa heat shock protein, mitochondrial;	;HSPD1	tr|B7Z532|B7Z532_HUMAN cDNA FLJ51028, highly similar to 60 kDa heat shock protein, mitochondrial OS=Homo sapiens OX=9606 PE=2 SV=1;tr|A0A7I2V5M1|A0A7I2V5M1_HUMAN 60 kDa heat shock protein, mitochondrial OS=Homo sapiens OX=9606 GN=HSPD1 PE=1 SV=1;tr|A0A7I2Y	11	1	1	1	3.7	26.685	245	5.9863	0	1	0	1	0	1	0	3.7	2854300	0	2854300	190290	0	190290
A0A8I5KYZ4;A0A8I5KNP3;A0A8I5KNN2;Q9NR30;A0A8I5KND9;Q3SWU7	A0A8I5KYZ4;A0A8I5KNP3;A0A8I5KNN2;Q9NR30;A0A8I5KND9	RNA helicase	DDX21	tr|A0A8I5KYZ4|A0A8I5KYZ4_HUMAN RNA helicase OS=Homo sapiens OX=9606 GN=DDX21 PE=1 SV=1;tr|A0A8I5KNP3|A0A8I5KNP3_HUMAN RNA helicase OS=Homo sapiens OX=9606 GN=DDX21 PE=1 SV=1;tr|A0A8I5KNN2|A0A8I5KNN2_HUMAN RNA helicase OS=Homo sapiens OX=9606 GN=DDX21 PE=1	6	3	3	3	4.8	81.577	729	17.817	0	3	0	3	0	3	0	4.8	10776000	0	10776000	176940	0	176940
G3V3B0;Q69YJ6;B4DQZ7;S4R3H4;E7EQT4;Q9UKV3	G3V3B0;Q69YJ6;B4DQZ7;S4R3H4;E7EQT4;Q9UKV3	Apoptotic chromatin condensation inducer in the nucleus;Uncharacterized protein DKFZp667N107 (Fragment);	ACIN1;DKFZp667N107;	tr|G3V3B0|G3V3B0_HUMAN Apoptotic chromatin condensation inducer in the nucleus OS=Homo sapiens OX=9606 GN=ACIN1 PE=1 SV=1;tr|Q69YJ6|Q69YJ6_HUMAN Uncharacterized protein DKFZp667N107 (Fragment) OS=Homo sapiens OX=9606 GN=DKFZp667N107 PE=2 SV=1;tr|B4DQZ7|B4D	6	2	2	2	4.8	67.494	582	12.057	0	2	0	2	0	2	0	4.8	8794300	0	8794300	176150	0	176150
K7EJ74;K7EP67;B4DZB1;B3KX19;Q6IBM8;A8KAP3;Q15029	K7EJ74;K7EP67;B4DZB1;B3KX19;Q6IBM8;A8KAP3;Q15029	116 kDa U5 small nuclear ribonucleoprotein component (Fragment)	EFTUD2	tr|K7EJ74|K7EJ74_HUMAN 116 kDa U5 small nuclear ribonucleoprotein component (Fragment) OS=Homo sapiens OX=9606 GN=EFTUD2 PE=1 SV=1;tr|K7EP67|K7EP67_HUMAN 116 kDa U5 small nuclear ribonucleoprotein component (Fragment) OS=Homo sapiens OX=9606 GN=EFTUD2 PE=1	7	1	1	1	9.7	14.81	134	6.3453	0	1	0	1	0	1	0	9.7	1751800	0	1751800	175180	0	175180
D6REM6;Q68D11;A0A0R4J2E8;A8MXP9;P43243;D6RBK5;H0Y8T4;Q9H4N1;D6R991;Q5CZA7;B4DF66;B3KM87;B4DRS1	D6REM6;Q68D11;A0A0R4J2E8;A8MXP9;P43243;D6RBK5;H0Y8T4;Q9H4N1;D6R991;Q5CZA7;B4DF66;B3KM87;B4DRS1	Matrin-3;Uncharacterized protein DKFZp686K23100	MATR3;DKFZp686K23100;	tr|D6REM6|D6REM6_HUMAN Matrin-3 OS=Homo sapiens OX=9606 GN=MATR3 PE=1 SV=1;tr|Q68D11|Q68D11_HUMAN Uncharacterized protein DKFZp686K23100 OS=Homo sapiens OX=9606 GN=DKFZp686K23100 PE=2 SV=1;tr|A0A0R4J2E8|A0A0R4J2E8_HUMAN Matrin-3 OS=Homo sapiens OX=9606 GN=	13	2	2	2	3.8	88.358	794	11.731	0	2	0	2	0	2	0	3.8	11797000	0	11797000	174340	0	174340
A0A024QZW7;P49790	A0A024QZW7;P49790	Nucleoporin 153kDa, isoform CRA_a;Nuclear pore complex protein Nup153	NUP153	tr|A0A024QZW7|A0A024QZW7_HUMAN Nucleoporin 153kDa, isoform CRA_a OS=Homo sapiens OX=9606 GN=NUP153 PE=4 SV=1;sp|P49790|NU153_HUMAN Nuclear pore complex protein Nup153 OS=Homo sapiens OX=9606 GN=NUP153 PE=1 SV=2	2	2	2	2	1.4	153.97	1475	12.044	0	2	0	2	0	2	0	1.4	11952000	0	11952000	170740	0	170740
A0A804HJB2;A8K8H0;P51801	A0A804HJB2;A8K8H0;P51801	Chloride channel protein;Chloride channel protein ClC-Kb	CLCNKB;	tr|A0A804HJB2|A0A804HJB2_HUMAN Chloride channel protein OS=Homo sapiens OX=9606 GN=CLCNKB PE=1 SV=1;tr|A8K8H0|A8K8H0_HUMAN Chloride channel protein OS=Homo sapiens OX=9606 PE=2 SV=1;sp|P51801|CLCKB_HUMAN Chloride channel protein ClC-Kb OS=Homo sapiens OX=9	3	1	1	1	5.8	75.317	686	6.0953	0	1	0	1	0	1	0	5.8	4594400	0	4594400	170160	0	170160
Q8IVT2	Q8IVT2	Mitotic interactor and substrate of PLK1	MISP	sp|Q8IVT2|MISP_HUMAN Mitotic interactor and substrate of PLK1 OS=Homo sapiens OX=9606 GN=MISP PE=1 SV=1	1	2	2	2	2.7	75.356	679	11.533	0	2	0	2	0	2	0	2.7	6889000	0	6889000	164020	0	164020
C9JHK9;C9JZV3;A0A090N7X1;A0A090N7Y2;Q9UG63	C9JHK9;C9JZV3;A0A090N7X1;A0A090N7Y2;Q9UG63	ATP-binding cassette sub-family F member 2 (Fragment);	ABCF2;	tr|C9JHK9|C9JHK9_HUMAN ATP-binding cassette sub-family F member 2 (Fragment) OS=Homo sapiens OX=9606 GN=ABCF2 PE=1 SV=1;tr|C9JZV3|C9JZV3_HUMAN ATP-binding cassette sub-family F member 2 (Fragment) OS=Homo sapiens OX=9606 GN=ABCF2 PE=1 SV=8;tr|A0A090N7X1|A0	5	2	2	2	9.2	26.93	240	12.147	0	2	0	2	0	2	0	9.2	2621200	0	2621200	163830	0	163830
A0A0A0MRM8;A0A1Y0BRN0;A0A1Y0BRN3;A0A590UK71;A0A5F9ZI03;A0A590UJY4;A0A590UK86;A0A590UK22;A0A590UKB0;A0A590UJ75;A0A0D9SGC1;A0A590UJ40;Q9UM54	A0A0A0MRM8;A0A1Y0BRN0;A0A1Y0BRN3;A0A590UK71;A0A5F9ZI03;A0A590UJY4;A0A590UK86;A0A590UK22;A0A590UKB0;A0A590UJ75;A0A0D9SGC1;A0A590UJ40;Q9UM54	Unconventional myosin-VI;	MYO6;Myo6-008;	tr|A0A0A0MRM8|A0A0A0MRM8_HUMAN Unconventional myosin-VI OS=Homo sapiens OX=9606 GN=MYO6 PE=1 SV=1;tr|A0A1Y0BRN0|A0A1Y0BRN0_HUMAN Unconventional myosin-VI OS=Homo sapiens OX=9606 GN=Myo6-008 PE=2 SV=1;tr|A0A1Y0BRN3|A0A1Y0BRN3_HUMAN Unconventional myosin-VI	13	2	2	2	2.2	145.01	1253	16.259	0	2	0	2	0	2	0	2.2	17512000	0	17512000	160630	0	160630
A0A3B3ITZ9;Q9Y2W1;Q7Z5U1;Q05D20;Q6P0P7;Q6PJV4	A0A3B3ITZ9;Q9Y2W1;Q7Z5U1;Q05D20;Q6P0P7;Q6PJV4	Thyroid hormone receptor-associated protein 3;	THRAP3;	tr|A0A3B3ITZ9|A0A3B3ITZ9_HUMAN Thyroid hormone receptor-associated protein 3 OS=Homo sapiens OX=9606 GN=THRAP3 PE=1 SV=1;sp|Q9Y2W1|TR150_HUMAN Thyroid hormone receptor-associated protein 3 OS=Homo sapiens OX=9606 GN=THRAP3 PE=1 SV=2;tr|Q7Z5U1|Q7Z5U1_HUMAN	6	2	2	2	3.1	103.52	910	13.605	0	2	0	2	0	2	0	3.1	8872200	0	8872200	158430	0	158430
P21333;Q60FE5;Q60FE6;A6NDY9;A0A7P0NMY4;Q8TES4;Q96C61;Q6NXF2;B4E2F9;B4DTD5;F8WE98;A0A7I2V3E6;A0A087WWY3;H0Y5F3;Q2VP91;H0Y5C6;Q86TQ3	P21333;Q60FE5;Q60FE6;A6NDY9;A0A7P0NMY4;Q8TES4	Filamin-A;Filamin A;	FLNA;	sp|P21333|FLNA_HUMAN Filamin-A OS=Homo sapiens OX=9606 GN=FLNA PE=1 SV=4;tr|Q60FE5|Q60FE5_HUMAN Filamin-A OS=Homo sapiens OX=9606 GN=FLNA PE=1 SV=1;tr|Q60FE6|Q60FE6_HUMAN Filamin A OS=Homo sapiens OX=9606 GN=FLNA PE=2 SV=1;tr|A6NDY9|A6NDY9_HUMAN Filamin A	17	7	7	7	3.1	280.74	2647	43.1	0	7	0	7	0	7	0	3.1	41683000	0	41683000	156900	0	156900
B4DI97;B4DZL9;F5H148;B7ZB55;B4DTK6;H3BMT1;Q9NYV6	B4DI97;B4DZL9;F5H148;B7ZB55;B4DTK6;H3BMT1;Q9NYV6	cDNA FLJ56083, highly similar to RNA polymerase I-specific transcriptioninitiation factor RRN3;		tr|B4DI97|B4DI97_HUMAN cDNA FLJ56083, highly similar to RNA polymerase I-specific transcriptioninitiation factor RRN3 OS=Homo sapiens OX=9606 PE=2 SV=1;tr|B4DZL9|B4DZL9_HUMAN cDNA FLJ55505, highly similar to RNA polymerase I-specific transcription initiati	7	1	1	1	2.6	57.307	502	-2	0	1	0	1	0	1	0	2.6	4541500	0	4541500	151380	0	151380
A9UFC0;B2CIS9;P31944	A9UFC0;B2CIS9;P31944	Caspase 14;Caspase 14, apoptosis-related cysteine peptidase;Caspase-14	CASP14;	tr|A9UFC0|A9UFC0_HUMAN Caspase 14 OS=Homo sapiens OX=9606 GN=CASP14 PE=2 SV=1;tr|B2CIS9|B2CIS9_HUMAN Caspase 14, apoptosis-related cysteine peptidase OS=Homo sapiens OX=9606 GN=CASP14 PE=2 SV=1;sp|P31944|CASPE_HUMAN Caspase-14 OS=Homo sapiens OX=9606 GN=CA	3	2	2	2	5	27.666	242	12.305	0	2	0	2	0	2	0	5	2665900	0	2665900	148110	0	148110
A0A1X7SBZ2;A0A5H1ZRQ2;Q59F66;Q92841;B4DZQ7;A0A0U1RQJ0	A0A1X7SBZ2;A0A5H1ZRQ2;Q59F66;Q92841;B4DZQ7	RNA helicase;RNA helicase (Fragment);	DDX17;	tr|A0A1X7SBZ2|A0A1X7SBZ2_HUMAN RNA helicase OS=Homo sapiens OX=9606 GN=DDX17 PE=1 SV=1;tr|A0A5H1ZRQ2|A0A5H1ZRQ2_HUMAN RNA helicase OS=Homo sapiens OX=9606 GN=DDX17 PE=1 SV=2;tr|Q59F66|Q59F66_HUMAN RNA helicase (Fragment) OS=Homo sapiens OX=9606 PE=2 SV=1;s	6	5	3	3	7.8	80.253	729	17.867	1	5	0	3	0	3	1.6	7.8	15014000	0	15014000	145910	0	145910
H7C1M2;P18583	H7C1M2;P18583	Protein SON (Fragment);Protein SON	SON	tr|H7C1M2|H7C1M2_HUMAN Protein SON (Fragment) OS=Homo sapiens OX=9606 GN=SON PE=1 SV=1;sp|P18583|SON_HUMAN Protein SON OS=Homo sapiens OX=9606 GN=SON PE=1 SV=4	2	1	1	1	2.2	159.91	1454	6.428	0	1	0	1	0	1	0	2.2	7962200	0	7962200	142180	0	142180
B7Z5G6;B7Z656;B7Z3F1;B7Z3G0;B7Z5Q8;E7EPK0;E9PDJ9;B7Z2J4;H0Y8P3;D6RD46;G5EA03;Q9UPQ0	B7Z5G6;B7Z656;B7Z3F1;B7Z3G0;B7Z5Q8;E7EPK0;E9PDJ9;B7Z2J4;H0Y8P3;D6RD46;G5EA03;Q9UPQ0	cDNA FLJ50057, weakly similar to LIM domain only protein 7 (Fragment);cDNA FLJ51076, weakly similar to LIM domain only protein 7;		tr|B7Z5G6|B7Z5G6_HUMAN cDNA FLJ50057, weakly similar to LIM domain only protein 7 (Fragment) OS=Homo sapiens OX=9606 PE=2 SV=1;tr|B7Z656|B7Z656_HUMAN cDNA FLJ51076, weakly similar to LIM domain only protein 7 OS=Homo sapiens OX=9606 PE=2 SV=1;tr|B7Z3F1|B7Z	12	1	1	1	1.4	81.007	710	5.9845	0	1	0	1	0	1	0	1.4	6533500	0	6533500	133340	0	133340
F5H3X6;F5GY37;Q99623	F5H3X6;F5GY37;Q99623	Prohibitin (Fragment);Prohibitin;Prohibitin-2	PHB2	tr|F5H3X6|F5H3X6_HUMAN Prohibitin (Fragment) OS=Homo sapiens OX=9606 GN=PHB2 PE=1 SV=3;tr|F5GY37|F5GY37_HUMAN Prohibitin OS=Homo sapiens OX=9606 GN=PHB2 PE=1 SV=1;sp|Q99623|PHB2_HUMAN Prohibitin-2 OS=Homo sapiens OX=9606 GN=PHB2 PE=1 SV=2	3	1	1	1	4.9	27.437	247	6.2712	0	1	0	1	0	1	0	4.9	2656100	0	2656100	132810	0	132810
Q5R210;Q5R208;Q5R206;A8K134;A0A024R454;P31327;A0A669KBF2;Q5R207;Q5R209	Q5R210;Q5R208;Q5R206;A8K134;A0A024R454;P31327	Carbamoylphosphate synthetase I	CPS1;	tr|Q5R210|Q5R210_HUMAN Carbamoylphosphate synthetase I OS=Homo sapiens OX=9606 GN=CPS1 PE=2 SV=1;tr|Q5R208|Q5R208_HUMAN Carbamoylphosphate synthetase I OS=Homo sapiens OX=9606 GN=CPS1 PE=2 SV=1;tr|Q5R206|Q5R206_HUMAN Carbamoylphosphate synthetase I OS=Homo	9	4	4	4	2.9	164.9	1500	24.173	0	4	0	4	0	4	0	2.9	15905000	0	15905000	131440	0	131440
P11388;A0A4D6UXC9	P11388;A0A4D6UXC9	DNA topoisomerase 2-alpha;DNA topoisomerase 2	TOP2A	sp|P11388|TOP2A_HUMAN DNA topoisomerase 2-alpha OS=Homo sapiens OX=9606 GN=TOP2A PE=1 SV=3;tr|A0A4D6UXC9|A0A4D6UXC9_HUMAN DNA topoisomerase 2 OS=Homo sapiens OX=9606 GN=TOP2A PE=2 SV=1	2	2	2	2	1.6	174.38	1531	11.549	1	1	1	1	1	1	0.8	0.8	11579000	0	11579000	124510	0	124510
B3KM86;D3DVI5;Q8N5A0;A0A087WUT6;O60841	B3KM86;D3DVI5;Q8N5A0;A0A087WUT6;O60841	Eukaryotic translation initiation factor 5B;	;EIF5B	tr|B3KM86|B3KM86_HUMAN Eukaryotic translation initiation factor 5B OS=Homo sapiens OX=9606 PE=2 SV=1;tr|D3DVI5|D3DVI5_HUMAN Eukaryotic translation initiation factor 5B OS=Homo sapiens OX=9606 GN=EIF5B PE=4 SV=1;tr|Q8N5A0|Q8N5A0_HUMAN Eukaryotic translation	5	2	2	2	4.7	71.492	634	19.41	0	2	0	2	0	2	0	4.7	4404500	0	4404500	122350	0	122350
Q13310;Q6IQ30;B1ANR0;A0A7I2V4L7;A0A7I2V5W9;Q59GZ7;A0A7I2V598;H0Y5F5;Q53GL4;H0YEU6;E5RGH3;H0YEQ8;Q3B867;Q147Y3;Q15164;H0YBN4;B1ANR1;E5RJB9;E5RH24;A0A7I2V4V6	Q13310;Q6IQ30;B1ANR0;A0A7I2V4L7;A0A7I2V5W9;Q59GZ7;A0A7I2V598;H0Y5F5;Q53GL4;H0YEU6;E5RGH3;H0YEQ8;Q3B867;Q147Y3;Q15164;H0YBN4;B1ANR1;E5RJB9;E5RH24;A0A7I2V4V6	Polyadenylate-binding protein 4;Polyadenylate-binding protein	PABPC4;	sp|Q13310|PABP4_HUMAN Polyadenylate-binding protein 4 OS=Homo sapiens OX=9606 GN=PABPC4 PE=1 SV=1;tr|Q6IQ30|Q6IQ30_HUMAN Polyadenylate-binding protein OS=Homo sapiens OX=9606 GN=PABPC4 PE=2 SV=1;tr|B1ANR0|B1ANR0_HUMAN Polyadenylate-binding protein OS=Homo	20	2	2	1	3.9	70.782	644	12.03	0	2	0	2	0	1	0	3.9	7638700	0	7638700	121740	0	121740
H0Y653;H0YDU4;A0PJ92;A0A494C128;A8K9K6;O00567	H0Y653;H0YDU4;A0PJ92;A0A494C128;A8K9K6;O00567	Nucleolar protein 56 (Fragment);NOP56 protein (Fragment)	NOP56;	tr|H0Y653|H0Y653_HUMAN Nucleolar protein 56 (Fragment) OS=Homo sapiens OX=9606 GN=NOP56 PE=1 SV=1;tr|H0YDU4|H0YDU4_HUMAN Nucleolar protein 56 (Fragment) OS=Homo sapiens OX=9606 GN=NOP56 PE=1 SV=1;tr|A0PJ92|A0PJ92_HUMAN NOP56 protein (Fragment) OS=Homo sapi	6	1	1	1	5.9	24.144	219	6.2034	0	1	0	1	0	1	0	5.9	1543100	0	1543100	118700	0	118700
Q7Z3K9;E9PPJ0;Q13435;E9PJT3;E9PJ04;H0YCG1	Q7Z3K9;E9PPJ0;Q13435;E9PJT3;E9PJ04;H0YCG1	Uncharacterized protein DKFZp781L0540 (Fragment);Splicing factor 3B subunit 2;	DKFZp781L0540;SF3B2;	tr|Q7Z3K9|Q7Z3K9_HUMAN Uncharacterized protein DKFZp781L0540 (Fragment) OS=Homo sapiens OX=9606 GN=DKFZp781L0540 PE=2 SV=1;tr|E9PPJ0|E9PPJ0_HUMAN Splicing factor 3B subunit 2 OS=Homo sapiens OX=9606 GN=SF3B2 PE=1 SV=1;sp|Q13435|SF3B2_HUMAN Splicing factor	6	2	2	2	4.3	90.022	799	15.372	0	2	0	2	0	2	0	4.3	10938000	0	10938000	104990	0	104990
H0YLE8;B4E2M0;A4QPB0;A0A024RC65;P46940;B4DNP4;Q6P1N4;A0A0J9YXZ5	H0YLE8;B4E2M0;A4QPB0;A0A024RC65;P46940;B4DNP4;Q6P1N4;A0A0J9YXZ5	Ras GTPase-activating-like protein IQGAP1;cDNA FLJ55443, highly similar to Ras GTPase-activating-like protein IQGAP1;	IQGAP1;	tr|H0YLE8|H0YLE8_HUMAN Ras GTPase-activating-like protein IQGAP1 OS=Homo sapiens OX=9606 GN=IQGAP1 PE=1 SV=1;tr|B4E2M0|B4E2M0_HUMAN cDNA FLJ55443, highly similar to Ras GTPase-activating-like protein IQGAP1 OS=Homo sapiens OX=9606 PE=2 SV=1;tr|A4QPB0|A4QPB	8	2	2	2	1.8	124.79	1085	11.829	0	2	0	2	0	2	0	1.8	9373200	0	9373200	103990	0	103990
A0A024QZ63;Q92614;B4DYM1;B4DZ32;B4E0T8	A0A024QZ63;Q92614;B4DYM1	HCG27198, isoform CRA_c;Unconventional myosin-XVIIIa;	hCG_27198;MYO18A;	tr|A0A024QZ63|A0A024QZ63_HUMAN HCG27198, isoform CRA_c OS=Homo sapiens OX=9606 GN=hCG_27198 PE=3 SV=1;sp|Q92614|MY18A_HUMAN Unconventional myosin-XVIIIa OS=Homo sapiens OX=9606 GN=MYO18A PE=1 SV=3;tr|B4DYM1|B4DYM1_HUMAN cDNA FLJ60372, highly similar to Myo	5	4	4	4	2	231.24	2039	23.906	0	4	0	4	0	4	0	2	14505000	0	14505000	95915	0	95915
Q53FA3;A0A1U9X7X4;B4DI54;P34931;A0A1U9X7W7;B4DXY3;B2RCQ9;A0A1U9X7X9;A0A0G2JIW1;A8K5I0;A0A1U9X7W4;P0DMV9;B4DWK5;B4DI39;Q59EJ3;P0DMV8;B4DNT8;B4E1S9;B4DVU9;Q9UQC1	Q53FA3;A0A1U9X7X4;B4DI54;P34931;A0A1U9X7W7;B4DXY3;B2RCQ9;A0A1U9X7X9;A0A0G2JIW1;A8K5I0;A0A1U9X7W4;P0DMV9;B4DWK5;B4DI39;Q59EJ3;P0DMV8	HSPA1L (Fragment);HSPA1L;cDNA FLJ56386, highly similar to Heat shock 70 kDa protein 1L	HSPA1L;	tr|Q53FA3|Q53FA3_HUMAN HSPA1L (Fragment) OS=Homo sapiens OX=9606 GN=HSPA1L PE=1 SV=1;tr|A0A1U9X7X4|A0A1U9X7X4_HUMAN HSPA1L OS=Homo sapiens OX=9606 PE=3 SV=1;tr|B4DI54|B4DI54_HUMAN cDNA FLJ56386, highly similar to Heat shock 70 kDa protein 1L OS=Homo sapien	20	3	1	1	6.4	70.403	641	6.3084	0	3	0	1	0	1	0	6.4	3508300	0	3508300	87708	0	87708
A0A494C1A5;A4FU77;O75643;Q9H8B9	A0A494C1A5;A4FU77;O75643;Q9H8B9	U5 small nuclear ribonucleoprotein 200 kDa helicase (Fragment);SNRNP200 protein (Fragment);	SNRNP200;	tr|A0A494C1A5|A0A494C1A5_HUMAN U5 small nuclear ribonucleoprotein 200 kDa helicase (Fragment) OS=Homo sapiens OX=9606 GN=SNRNP200 PE=1 SV=1;tr|A4FU77|A4FU77_HUMAN SNRNP200 protein (Fragment) OS=Homo sapiens OX=9606 GN=SNRNP200 PE=2 SV=1;sp|O75643|U520_HUMA	4	4	4	4	3.6	157.65	1375	25.91	0	4	0	4	0	4	0	3.6	16931000	0	16931000	81535	0	81535
Q9HB00;Q08554	Q9HB00;Q08554	Desmocollin 1, isoform CRA_b;Desmocollin-1	DSC1	tr|Q9HB00|Q9HB00_HUMAN Desmocollin 1, isoform CRA_b OS=Homo sapiens OX=9606 GN=DSC1 PE=4 SV=1;sp|Q08554|DSC1_HUMAN Desmocollin-1 OS=Homo sapiens OX=9606 GN=DSC1 PE=1 SV=2	2	1	1	1	1.1	93.834	840	6.2857	0	1	0	1	0	1	0	1.1	3452900	0	3452900	70468	0	70468
P46013	P46013	Proliferation marker protein Ki-67	MKI67	sp|P46013|KI67_HUMAN Proliferation marker protein Ki-67 OS=Homo sapiens OX=9606 GN=MKI67 PE=1 SV=2	1	3	3	3	2.1	358.69	3256	18.909	0	3	0	3	0	3	0	2.1	20599000	0	20599000	56650	0	56650
B3KWI5;E9PMC9;Q7Z589	B3KWI5;E9PMC9;Q7Z589	cDNA FLJ43124 fis, clone CTONG3004072, highly similar to Protein EMSY;BRCA2-interacting transcriptional repressor EMSY;	;EMSY	tr|B3KWI5|B3KWI5_HUMAN cDNA FLJ43124 fis, clone CTONG3004072, highly similar to Protein EMSY OS=Homo sapiens OX=9606 PE=2 SV=1;tr|E9PMC9|E9PMC9_HUMAN BRCA2-interacting transcriptional repressor EMSY OS=Homo sapiens OX=9606 GN=EMSY PE=1 SV=1;sp|Q7Z589|EMSY_	3	1	1	1	1.1	130.78	1224	6.3445	0	1	0	1	0	1	0	1.1	3483900	0	3483900	49771	0	49771
B2R5U1;B4E299;B3KU67;A0A140VK49;Q59FF0;Q7KZF4	B2R5U1;B4E299;B3KU67;A0A140VK49;Q59FF0;Q7KZF4	Staphylococcal nuclease domain-containing protein;		tr|B2R5U1|B2R5U1_HUMAN Staphylococcal nuclease domain-containing protein OS=Homo sapiens OX=9606 PE=2 SV=1;tr|B4E299|B4E299_HUMAN Staphylococcal nuclease domain-containing protein OS=Homo sapiens OX=9606 PE=2 SV=1;tr|B3KU67|B3KU67_HUMAN Staphylococcal nucl	6	1	1	1	1.5	99.67	885	6.1478	0	1	0	1	0	1	0	1.5	2682500	0	2682500	44708	0	44708
H0Y8Y7;A0A3B3IS06;E7ETY2;Q13428;A0A2R8Y4M7;A0A2R8Y857;B4DLB1;Q59FZ2;B4DRA2;A0A6I8PRA0	H0Y8Y7;A0A3B3IS06;E7ETY2;Q13428;A0A2R8Y4M7;A0A2R8Y857;B4DLB1;Q59FZ2;B4DRA2;A0A6I8PRA0	Treacle protein;Treacle protein (Fragment)	TCOF1	tr|H0Y8Y7|H0Y8Y7_HUMAN Treacle protein OS=Homo sapiens OX=9606 GN=TCOF1 PE=1 SV=2;tr|A0A3B3IS06|A0A3B3IS06_HUMAN Treacle protein (Fragment) OS=Homo sapiens OX=9606 GN=TCOF1 PE=1 SV=1;tr|E7ETY2|E7ETY2_HUMAN Treacle protein OS=Homo sapiens OX=9606 GN=TCOF1 P	10	2	2	2	2.2	100.58	994	14.342	0	2	0	2	0	2	0	2.2	2591900	0	2591900	44688	0	44688
P19474	P19474	E3 ubiquitin-protein ligase TRIM21	TRIM21	sp|P19474|RO52_HUMAN E3 ubiquitin-protein ligase TRIM21 OS=Homo sapiens OX=9606 GN=TRIM21 PE=1 SV=1	1	1	1	1	1.9	54.169	475	6.0005	0	1	0	1	0	1	0	1.9	1339100	0	1339100	44635	0	44635
B4DM32;E1NZA1;Q92616	B4DM32;E1NZA1;Q92616	cDNA FLJ54481, highly similar to GCN1-like protein 1 (Fragment);Peroxisome proliferator activated receptor interacting complex protein	;PRIC295	tr|B4DM32|B4DM32_HUMAN cDNA FLJ54481, highly similar to GCN1-like protein 1 (Fragment) OS=Homo sapiens OX=9606 PE=2 SV=1;tr|E1NZA1|E1NZA1_HUMAN Peroxisome proliferator activated receptor interacting complex protein OS=Homo sapiens OX=9606 GN=PRIC295 PE=2 S	3	1	1	1	1.5	89.206	813	6.0364	0	1	0	1	0	1	0	1.5	1807000	0	1807000	34751	0	34751
A0A384P5S9;A0A024R889;A0A0D9SF54;A0A0D9SGF6;Q13813;A0A1B0GTB7;A0A0D9SFH4;A0A0D9SFF6;B4DTV8;B4DGT1	A0A384P5S9;A0A024R889;A0A0D9SF54;A0A0D9SGF6;Q13813;A0A1B0GTB7;A0A0D9SFH4;A0A0D9SFF6;B4DTV8;B4DGT1	Epididymis secretory sperm binding protein;Spectrin, alpha, non-erythrocytic 1 (Alpha-fodrin), isoform CRA_g;	;SPTAN1	tr|A0A384P5S9|A0A384P5S9_HUMAN Epididymis secretory sperm binding protein OS=Homo sapiens OX=9606 PE=2 SV=1;tr|A0A024R889|A0A024R889_HUMAN Spectrin, alpha, non-erythrocytic 1 (Alpha-fodrin), isoform CRA_g OS=Homo sapiens OX=9606 GN=SPTAN1 PE=3 SV=1;tr|A0A0	10	2	2	2	0.9	282.28	2452	28.526	0	2	0	2	0	2	0	0.9	2842700	0	2842700	15041	0	15041
B4DFX6;F6XZD3;Q8N283	B4DFX6;F6XZD3;Q8N283	cDNA FLJ58791, highly similar to Ankyrin repeat domain-containing protein 35;Ankyrin repeat domain-containing protein 35;	;ANKRD35	tr|B4DFX6|B4DFX6_HUMAN cDNA FLJ58791, highly similar to Ankyrin repeat domain-containing protein 35 OS=Homo sapiens OX=9606 PE=2 SV=1;tr|F6XZD3|F6XZD3_HUMAN Ankyrin repeat domain-containing protein 35 OS=Homo sapiens OX=9606 GN=ANKRD35 PE=1 SV=1;sp|Q8N283|	3	1	1	1	1	100.3	910	6.4297	1	0	1	0	1	0	1	0	0	0	0	0	0	0
B7Z5C1;B4DHD2;Q4W4Y1;Q8WUM4	B7Z5C1;B4DHD2;Q4W4Y1;Q8WUM4	cDNA FLJ56126, highly similar to Programmed cell death 6-interacting protein;cDNA FLJ55458, highly similar to Programmed cell death 6-interacting protein		tr|B7Z5C1|B7Z5C1_HUMAN cDNA FLJ56126, highly similar to Programmed cell death 6-interacting protein OS=Homo sapiens OX=9606 PE=2 SV=1;tr|B4DHD2|B4DHD2_HUMAN cDNA FLJ55458, highly similar to Programmed cell death 6-interacting protein OS=Homo sapiens OX=960	4	1	1	1	2	71.819	649	6.4244	0	1	0	1	0	1	0	2	0	0	0	0	0	0
Q4KMQ1	Q4KMQ1	Taperin	TPRN	sp|Q4KMQ1|TPRN_HUMAN Taperin OS=Homo sapiens OX=9606 GN=TPRN PE=1 SV=2	1	1	1	1	1.8	75.555	711	6.4015	0	1	0	1	0	1	0	1.8	0	0	0	0	0	0
D6R992;A8K3H9;Q01201	D6R992;A8K3H9;Q01201	Transcription factor RelB;	RELB;	tr|D6R992|D6R992_HUMAN Transcription factor RelB OS=Homo sapiens OX=9606 GN=RELB PE=1 SV=1;tr|A8K3H9|A8K3H9_HUMAN cDNA FLJ75649, highly similar to Homo sapiens v-rel reticuloendotheliosis viral oncogene homolog B, nuclear factor of kappa light polypeptide	3	1	1	1	1.6	61.776	576	6.3714	0	1	0	1	0	1	0	1.6	0	0	0	0	0	0
A0A3B3IU53	A0A3B3IU53	Male-specific lethal 3 homolog (Fragment)	MSL3	tr|A0A3B3IU53|A0A3B3IU53_HUMAN Male-specific lethal 3 homolog (Fragment) OS=Homo sapiens OX=9606 GN=MSL3 PE=1 SV=1	1	1	1	1	20	8.557	70	6.3597	1	0	1	0	1	0	20	0	0	0	0	0	0	0
